# Supplementary material for: Strategies for Controlling the Spatial Orientation of Single Molecules Tethered on DNA Origami Templates Physisorbed on Glass Substrates: Intercalation and Stretching
Source: MDPI journal article supplement (doi:10.3390/ijms23147690), 2022-07-12
Supplement: s1 [file s1]

# Supplementary Materials:

## Strategies for Controlling the Spatial Orientation of Single Molecules Tethered on DNA Origami Templates Physisorbed on Glass Substrates: Intercalation and Stretching

*Keitel Cervantes-Salguero*<sup>1,\*</sup> *Austin Biaggne*<sup>1</sup> *John M. Youngsman*<sup>1</sup> *Brett M. Ward*<sup>1</sup> *Young C. Kim*<sup>2</sup> *Lan Li*<sup>1,3</sup> *John A. Hall*<sup>4</sup> *William B. Knowlton*<sup>1,5</sup> *Elton Graugnard*<sup>1,3</sup> *Wan Kuang*<sup>5,\*</sup>

<sup>1</sup> Micron School of Materials Science and Engineering, Boise State University, Boise, ID 83725, USA

<sup>2</sup> Materials Science and Technology Division, U.S. Naval Research Laboratory, Code 6300, Washington, D.C. 20375, USA

<sup>3</sup> Center for Advanced Energy Studies, Idaho Falls, ID, USA

<sup>4</sup> Division of Research and Economic Development, Boise State University, Boise, ID, USA

<sup>5</sup> Department of Electrical and Computer Engineering, Boise State University, Boise, ID, USA

\* Correspondence: keitlercervantess@boisestate.edu, wankuang@boisestate.edu

Keywords: *DNA origami, nanoarchitectonics, single molecules, orientation control, dipolar imaging, super resolution microscopy, DNA-PAINT, intercalation, mechanical stretching, cyanine, Cy5*

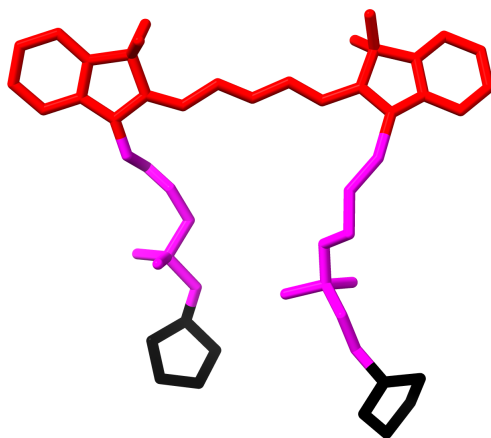

Figure S1: The molecular structure of Cy5 and the two tethers. Cy5 dye (red), tethers (pink) and DNA sugars (black). Whereas both tethers consisted of one C3 linker and one phosphate, the tether on the 3' end of the Cy5 (the tether on the right) had an additional carbon.

## Text S1 Rationale of the design: orientation-dependence, neighboring bases and surface

We discuss a thought experiment on the position-dependent orientation of a single molecule attached to a long rigid DNA duplex frozen in space. In particular, the single molecule is attached between two consecutive DNA bases in the center of the duplex. It is assumed that all the bases are the same. Here, we further assume that the single molecule will have a range of orientations with a mean angle with respect to the DNA duplex axis (relative angle). This assumption implies that a local minimum exists for the interaction of the single molecule and DNA. If the single molecule is placed one base after, its relative angle will remain the same; the same happens if the single molecule is placed one base before. As a result, the relative angle of the single molecule is independent of the attachment position on the DNA. Because an angle twist per base ( $\sim 35.4^\circ$  in B-form)[1] is present relative to the DNA axis, the position-dependent orientations must follow a helical trend.

The previous analysis assumed that all the neighboring bases were exactly the same and no effect resulted from the immobilizing substrate, which is not the case in reality. We did an experiment that suggested that the neighboring bases had an effect on the orientation. In this experiment, Cy5 was simply attached to one staple strand of the origami, i.e. the DNA sequence was fixed and therefore the neighboring bases of the Cy5 were always changing (see S2).

In the results,  $\phi_{\text{mean}}$  was also approximately perpendicular to the DNA axis, which strongly suggested intercalation; however,  $\theta_{\text{mean}}$  had a trend that did not follow a clear pattern but oscillated around a geometrical model (see Main Text and Text S4.1). This range of orientations suggested a dependence on the neighboring bases. Moreover, the effect of the immobilizing surface might be observed for  $\mathbf{b} = \mathbf{7}$  to  $\mathbf{10}$  but this effect was not completely clear as the neighboring bases were different. Nevertheless, these results prompted us to design the DNA platform to keep the same neighboring bases and prevent any effect due to the surface.





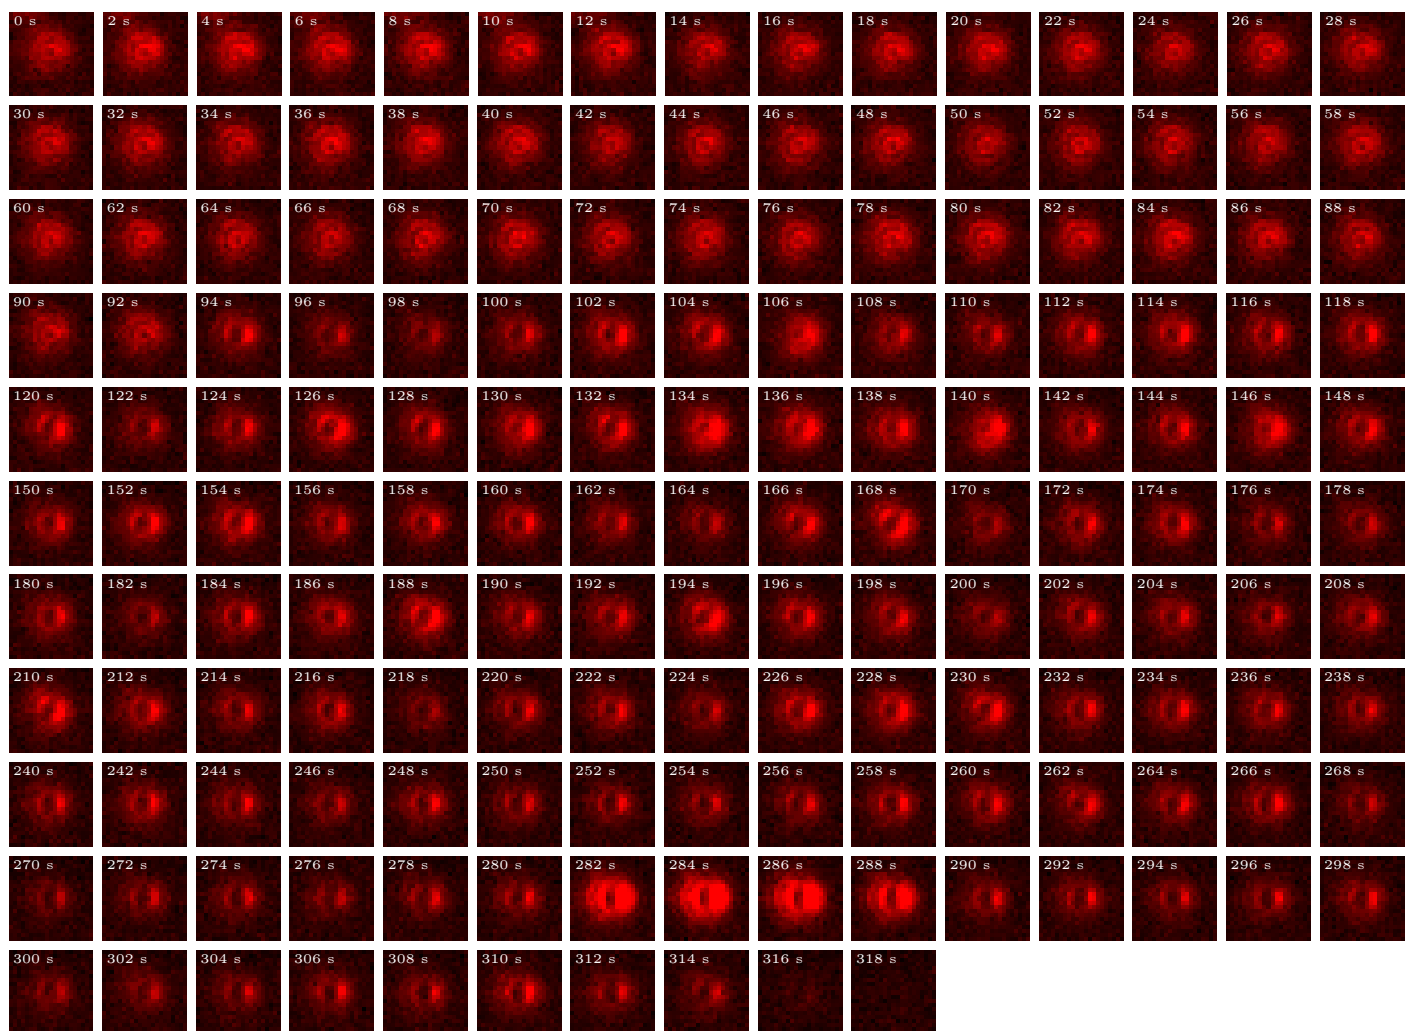

Figure S3: Representative time series of a dipole changing orientation in sample **6AA**. Time evolution runs from the top-left frame to the bottom-right frame. Each frame was captured for 2 sec. The different orientations are observed at 0 s (until 92 s), 104 s (again at 138 s), 112 s, 272 s (until 276 s, and again at 282 s). Dye was bleached completely in the last frame.

## Text S2 Kent distribution

The spherical data were analyzed in the framework of the Kent (Fisher-Bingham) distribution[2, 3] which is a spherical analogue of the general bivariate normal distribution in the plane. The Kent distribution can model asymmetric data as oval contours. A confidence region can be obtained as an elliptical cone to represent the dispersion of the data. The Kent distribution is defined by the parameters  $\kappa$ ,  $\beta$ , and  $\Gamma$ , which represents the concentration, describes the ovalness, and represents the orientation and axial components of the Kent distribution. These parameters can be estimated by the moment estimates  $\tilde{\kappa}$ ,  $\tilde{\beta}$  and  $\tilde{\Gamma}$  using an iterative method. In particular,  $\tilde{\Gamma}$  is used to find the elliptical cone. The mathematical treatment was described in the original article by Kent[2] but a simplified description in the context of our measurements is described as follows.

Consider the Cartesian and Spherical coordinates as in Figure 1A in the main text. The sample mean vector of the transition dipole moments  $\boldsymbol{\mu}_i = [x_i, y_i, z_i]$  ( $i = 1$  to  $n$ ) was calculated as  $\bar{\boldsymbol{\mu}} = n^{-1} \sum \boldsymbol{\mu}_i$ . The spherical coordinates of the unit vector  $\hat{\boldsymbol{\mu}} = \bar{\boldsymbol{\mu}} / \|\bar{\boldsymbol{\mu}}\| = [x_{\text{mean}}, y_{\text{mean}}, z_{\text{mean}}]$  were obtained from:

$$\begin{aligned} x_{\text{mean}} &= \cos(\phi_{\text{mean}}) \sin(\theta_{\text{mean}}) \\ y_{\text{mean}} &= \sin(\phi_{\text{mean}}) \sin(\theta_{\text{mean}}) \\ z_{\text{mean}} &= \cos(\theta_{\text{mean}}) \end{aligned}$$

The sample dispersion matrix was calculated as  $\mathbf{S} = n^{-1} \sum \boldsymbol{\mu}_i \boldsymbol{\mu}_i^T$ .

The general idea was to properly rotate all the  $\boldsymbol{\mu}_i$  vectors along the  $\bar{\boldsymbol{\mu}}$ , which became a new axis. And then determining variances related to the two orthogonal axes perpendicular to the new axis. This was done in three steps.

The first step was a transformation that rotated all  $\boldsymbol{\mu}_i$  in such a way that  $\bar{\boldsymbol{\mu}}$  was aligned to a new  $Z^*$  axis. This transformation was done by the orthogonal rotational matrix  $H$ :

$$H = \begin{bmatrix} \cos(\theta_{\text{mean}}) \cos(\phi_{\text{mean}}) & -\sin(\phi_{\text{mean}}) & \cos(\theta_{\text{mean}}) \cos(\phi_{\text{mean}}) \\ \cos(\theta_{\text{mean}}) \sin(\phi_{\text{mean}}) & \cos(\phi_{\text{mean}}) & \sin(\theta_{\text{mean}}) \sin(\phi_{\text{mean}}) \\ -\sin(\theta_{\text{mean}}) & 0 & \cos(\theta_{\text{mean}}) \end{bmatrix} \quad (1)$$

The second step was a transformation that rotated all  $\boldsymbol{\mu}_i$  around  $Z^*$  and aligned the axes of large and small dispersion to the new  $X^*$  and new  $Y^*$  axis, respectively. This transformation was done by diagonalizing the upper submatrix  $B_U$  ( $2 \times 2$ ) of  $B = H^T S H$ :

$$B_U = \begin{bmatrix} b_{11} & b_{12} \\ b_{21} & b_{22} \end{bmatrix} \quad (2)$$

$\psi$  was chosen so  $\psi = \arctan(2b_{12}/(b_{11} - b_{22}))/2$ , and the rotation matrix  $K$  along the  $Z^*$  was:

$$K = \begin{bmatrix} \cos\psi & -\sin\psi & 0 \\ \sin\psi & \cos\psi & 0 \\ 0 & 0 & 1 \end{bmatrix} \quad (3)$$

Then  $\tilde{\Gamma} = H K$ .

The third step was determining an ellipse-like region on the unit sphere. This ellipse was defined by the sample moments  $\sigma_{x^*}$  and  $\sigma_{y^*}$ :

$$\begin{aligned} \sigma_{x^*}^2 &= n^{-1} \sum x_i^{*2} \\ \sigma_{y^*}^2 &= n^{-1} \sum y_i^{*2} \end{aligned}$$

Where the coordinates in the new  $X^*Y^*Z^*$  axes were transformed:  $[x_i^*, y_i^*, z_i^*] = \tilde{\Gamma}^T[x_i, y_i, z_i]^T$ .

Finally,  $\sigma = \sqrt{\sigma_{x^*}\sigma_{y^*}}$  was the radius of a circular cone with the same area as the elliptical cone in [4, 2]. In our calculation of  $\hat{\boldsymbol{\mu}}$  and  $\sigma$ , outliers were not considered.

### Text S3 Cartesian coordinate system

To calculate the Cartesian coordinate system (XYZ axes) for the 16 base pairs DNA duplex, the following criteria were used. Calculating the X axis was done by obtaining the center axis of the DNA duplex helix. To calculate the Y axis, we considered the fact that the plane containing the flat DNA origami also contained the DNA duplex and, therefore, the Y axis belonged to this plane and was perpendicular to the center axis of the DNA duplex. Moreover, the DNA origami structure imposed a positional limitation at the two crossovers of both terminal ends of the DNA duplex. These two crossovers were at the 5' end of one strand and at the 5' end of the complementary strand. In addition, the DNA duplex could rotate around the center axis of the DNA duplex but this rotation was limited by the two crossovers; as a result, the DNA duplex was symmetrically positioned relative to the two crossovers, i.e., to the 5' ends of the DNA duplex. The previous structural considerations meant that, in our DNA duplex system, to calculate the Y axis we needed to find the plane that passed through the center axis of the DNA duplex and was satisfying a symmetrical relationship with the terminal ends of the DNA duplex, as seen in Figure 1C in the main text. Once both X and Y axes were defined, calculating the Z axis was simply achieved by obtaining the vector perpendicular to both the X and Y axis. The preceding criteria for finding the XYZ axes was applied to our geometrical model and molecular dynamic simulations. In our calculations, the DNA bases were represented by the C1' carbon atoms of the DNA duplex. C1' is the carbon connecting the DNA base to the sugar of the backbone. In the molecular dynamic simulations, the XYZ axes were recalculated at every simulation step.

## Text S4 Geometric models

### Text S4.1 Model for position-dependence

A DNA model was built based on a 16 base pairs DNA in B-form. The atomic positions were obtained from Protein Data Bank (PDB) data. In this model, the positions of the bases were simplified by representing them by the position of the C1' carbon atoms of the respective sugars of the DNA backbone. The Cartesian coordinate system for the DNA duplex was calculated as in Text S3 (see Figure 1A in the main text for schematics of the coordinates). In the model, the vector orientation for a flanking base pair was calculated by connecting the respective C1' carbons of each of the two bases in the base pair. The vector orientations were obtained for both two flanking base pairs. Then, the mean orientation of the two vectors was calculated. The orientation of the model as a function of  $b$  was given by  $\theta_{\text{model}} = 285.7^\circ - 35.7^\circ \times b$ , and  $\phi_{\text{model}} \approx 90^\circ$  (perpendicular to the DNA axis for any position).

### Text S4.2 Model for stretching

In similar way to Text S4.1, a DNA model was built based on a 16 base pairs DNA in B-form. This time, the vector orientation from one flanking base to the other flanking base was calculated for all stretching levels.

Table S1: Statistical results for all samples in the Main Text: **bTT**, **bGC**, **bAA**, **-bTT**, **-bGC**, and **6GC/n**

| Sample                           | $\theta_{\text{mean}}$ | $\phi_{\text{mean}}$ | $\sigma_{x^*}$ | $\sigma_{y^*}$ | $\sigma$ |
|----------------------------------|------------------------|----------------------|----------------|----------------|----------|
| <b>5TT</b> (5'-TCT-Cy5-TAT-3')   | 121.2°                 | 97.4°                | 7.6°           | 5.1°           | 6.2°     |
| <b>6TT</b> (5'-TCT-Cy5-TAT-3')   | 70.4°                  | 98.2°                | 7.0°           | 4.4°           | 5.6°     |
| <b>7TT</b> (5'-TCT-Cy5-TAT-3')   | 48.8°                  | 96.1°                | 8.2°           | 4.0°           | 5.7°     |
| <b>8TT</b> (5'-TCT-Cy5-TAT-3')   | 30.0°                  | 80.8°                | 5.5°           | 3.6°           | 4.5°     |
| <b>9TT</b> (5'-TCT-Cy5-TAT-3')   | 145.8°                 | 78.8°                | 9.4°           | 5.0°           | 6.9°     |
| <b>10TT</b> (5'-TCT-Cy5-TAT-3')  | 122.3°                 | 83.0°                | 9.8°           | 5.3°           | 7.2°     |
| <b>5GC</b> (5'-TCG-Cy5-CAT-3')   | 120.4°                 | 101.4°               | 8.5°           | 4.5°           | 6.2°     |
| <b>6GC</b> (5'-TCG-Cy5-CAT-3')   | 14.5°                  | 73.6°                | 14.9°          | 9.8°           | 12.1°    |
| <b>7GC</b> (5'-TCG-Cy5-CAT-3')   | 1.0°                   | 2.5°                 | 24.0°          | 6.8°           | 12.7°    |
| <b>8GC</b> (5'-TCG-Cy5-CAT-3')   | 174.5°                 | 29.3°                | 23.9°          | 13.0°          | 17.6°    |
| <b>9GC</b> (5'-TCG-Cy5-CAT-3')   | 151.5°                 | 83.0°                | 14.2°          | 9.3°           | 11.5°    |
| <b>10GC</b> (5'-TCG-Cy5-CAT-3')  | 118.7°                 | 87.2°                | 11.4°          | 5.6°           | 8.0°     |
| <b>5AA</b> (5'-TCA-Cy5-AAT-3')   | 70.1°                  | 95.2°                | 15.0°          | 9.71°          | 12.1°    |
| <b>6AA</b> (5'-TCA-Cy5-AAT-3')   | 24.1°                  | 61.5°                | 15.9°          | 7.4°           | 10.8°    |
| <b>7AA</b> (5'-TCA-Cy5-AAT-3')   | 169.9°                 | 120.2°               | 21.2°          | 9.5°           | 14.2°    |
| <b>8AA</b> (5'-TCA-Cy5-AAT-3')   | 140.0°                 | 105.5°               | 8.6°           | 5.7°           | 7.0°     |
| <b>9AA</b> (5'-TCA-Cy5-AAT-3')   | 105.4°                 | 87.7°                | 16.1°          | 6.2°           | 10.0°    |
| <b>10AA</b> (5'-TCA-Cy5-AAT-3')  | 93.8°                  | 83.5°                | 14.9°          | 8.7°           | 11.4°    |
| <b>-5TT</b> (3'-TAT-Cy5-TCT-5')  | 101.8°                 | 95.0°                | 16.2°          | 8.3°           | 11.6°    |
| <b>-6TT</b> (3'-TAT-Cy5-TCT-5')  | 76.2°                  | 96.8°                | 9.6°           | 6.2°           | 7.7°     |
| <b>-7TT</b> (3'-TAT-Cy5-TCT-5')  | 66.5°                  | 95.4°                | 8.7°           | 5.7°           | 7.0°     |
| <b>-8TT</b> (3'-TAT-Cy5-TCT-5')  | 59.0°                  | 96.6°                | 10.6°          | 6.7°           | 8.4°     |
| <b>-9TT</b> (3'-TAT-Cy5-TCT-5')  | 94.0°                  | 88.1°                | 20.2°          | 8.4°           | 13.0°    |
| <b>-10TT</b> (3'-TAT-Cy5-TCT-5') | 63.8°                  | 66.6°                | 10.6°          | 9.7°           | 10.1°    |
| <b>-5GC</b> (3'-TAC-Cy5-GCT-5')  | 113.2°                 | 99.2°                | 8.4°           | 6.9°           | 7.6°     |
| <b>-6GC</b> (3'-TAC-Cy5-GCT-5')  | 126.0°                 | 97.4°                | 8.1°           | 3.9°           | 5.6°     |
| <b>-7GC</b> (3'-TAC-Cy5-GCT-5')  | 83.7°                  | 88.9°                | 16.1°          | 4.7°           | 8.7°     |
| <b>-8GC</b> (3'-TAC-Cy5-GCT-5')  | 67.6°                  | 86.6°                | 11.6°          | 6.3°           | 8.6°     |
| <b>-9GC</b> (3'-TAC-Cy5-GCT-5')  | 28.1°                  | 89.3°                | 5.8°           | 3.1°           | 4.3°     |
| <b>-10GC</b> (3'-TAC-Cy5-GCT-5') | 82.8°                  | 23.0°                | 13.1°          | 6.8°           | 9.4°     |
| <b>6GC/0 (=6GC)</b>              | 14.5°                  | 73.6°                | 14.9°          | 9.8°           | 12.1°    |
| <b>6GC/1</b>                     | 76.0°                  | 93.1°                | 10.0°          | 6.8°           | 8.3°     |
| <b>6GC/2</b>                     | 59.9°                  | 86.5°                | 15.6°          | 7.9°           | 11.1°    |
| <b>6GC/3</b>                     | 89.3°                  | 100.0°               | 17.0°          | 13.9°          | 15.4°    |
| <b>6GC/4</b>                     | 65.2°                  | 104.7°               | 21.6°          | 12.1°          | 16.2°    |
| <b>6GC/5</b>                     | 47.2°                  | 111.5°               | 8.8°           | 5.2°           | 6.8°     |
| <b>6GC/6</b>                     | 89.3°                  | 51.6°                | 13.9°          | 6.2°           | 9.3°     |
| <b>6GC/7</b>                     | 69.0°                  | 15.2°                | 18.9°          | 11.8°          | 14.9°    |
| <b>6GC/8</b>                     | 80.8°                  | 10.0°                | 11.9°          | 8.9°           | 10.3°    |

Table S2: Fitting parameters for the linear fittings in Figure 2 of the Main Text.

| Sample     | Intercept              | Slope                 | Pearson's r | R-square (COD) | Adj. R-Square |
|------------|------------------------|-----------------------|-------------|----------------|---------------|
| <b>bTT</b> | $292.6187 \pm 22.5619$ | $-35.0495 \pm 2.9332$ | -0.98628    | 0.97275        | 0.96594       |
| <b>bAA</b> | $217.9975 \pm 18.3673$ | $-31.6574 \pm 2.3879$ | -0.98881    | 0.97775        | 0.97219       |

Table S3: DFT results of optimized structures shown in Figure S4. Distances and angles were calculated based on the structural definitions in S5. The interaction energy in kcal/mol was calculated as  $E_{int} = E_{system} - E_{base} - E_{dye}$ , where  $E$  was the energy of the fully relaxed molecule. Angles and distances were measured as in Figure S5.

| DNA base<br>(structure) | Interaction energy<br>(kcal/mol) | Dye-base distance<br>(nm) | Stack angle<br>(°) | Planar angle<br>(°) | Orientation                   |
|-------------------------|----------------------------------|---------------------------|--------------------|---------------------|-------------------------------|
| A (A1)                  | -14.93                           | 0.37                      | 96.46              | 3.5                 | Parallel stacking             |
| A (A2)                  | -13.66                           | 0.36                      | 107.26             | 10.44               | Parallel stacking             |
| A (A3)                  | -13.49                           | 0.38                      | 117.36             | 8.56                | Parallel stacking             |
| T (T1)                  | -13.05                           | 0.37                      | 111.05             | 10.57               | Parallel stacking             |
| T (T2)                  | -12.13                           | 0.36                      | 91.65              | 16.81               | Parallel stacking             |
| T (T3)                  | -11.98                           | 0.38                      | 114.31             | 11.07               | Parallel stacking             |
| T (T4)                  | -10.57                           | 0.38                      | 114.31             | 11.07               | Parallel stacking             |
| C (C1)                  | -14.09                           | 0.35                      | 99.05              | 4.18                | Parallel stacking             |
| C (C2)                  | -16.60                           | 0.49                      | 76.53              | 81.17               | T stacking                    |
| C (C3)                  | -19.31                           | 0.48                      | 79.22              | 88.78               | T stacking                    |
| G (G1)                  | -18.37                           | 0.42                      | 114.07             | 7.67                | Parallel stacking             |
| G (G2)                  | -17.09                           | 0.38                      | 112.44             | 6.13                | Parallel stacking             |
| G (G3)                  | -18.41                           | 0.46                      | 67.44              | 49.65               | Oblique stacking              |
| G (G4)                  | -19.08                           | 0.64                      | 32.38              | 36.59               | Stacking with<br>the Cy5 axis |

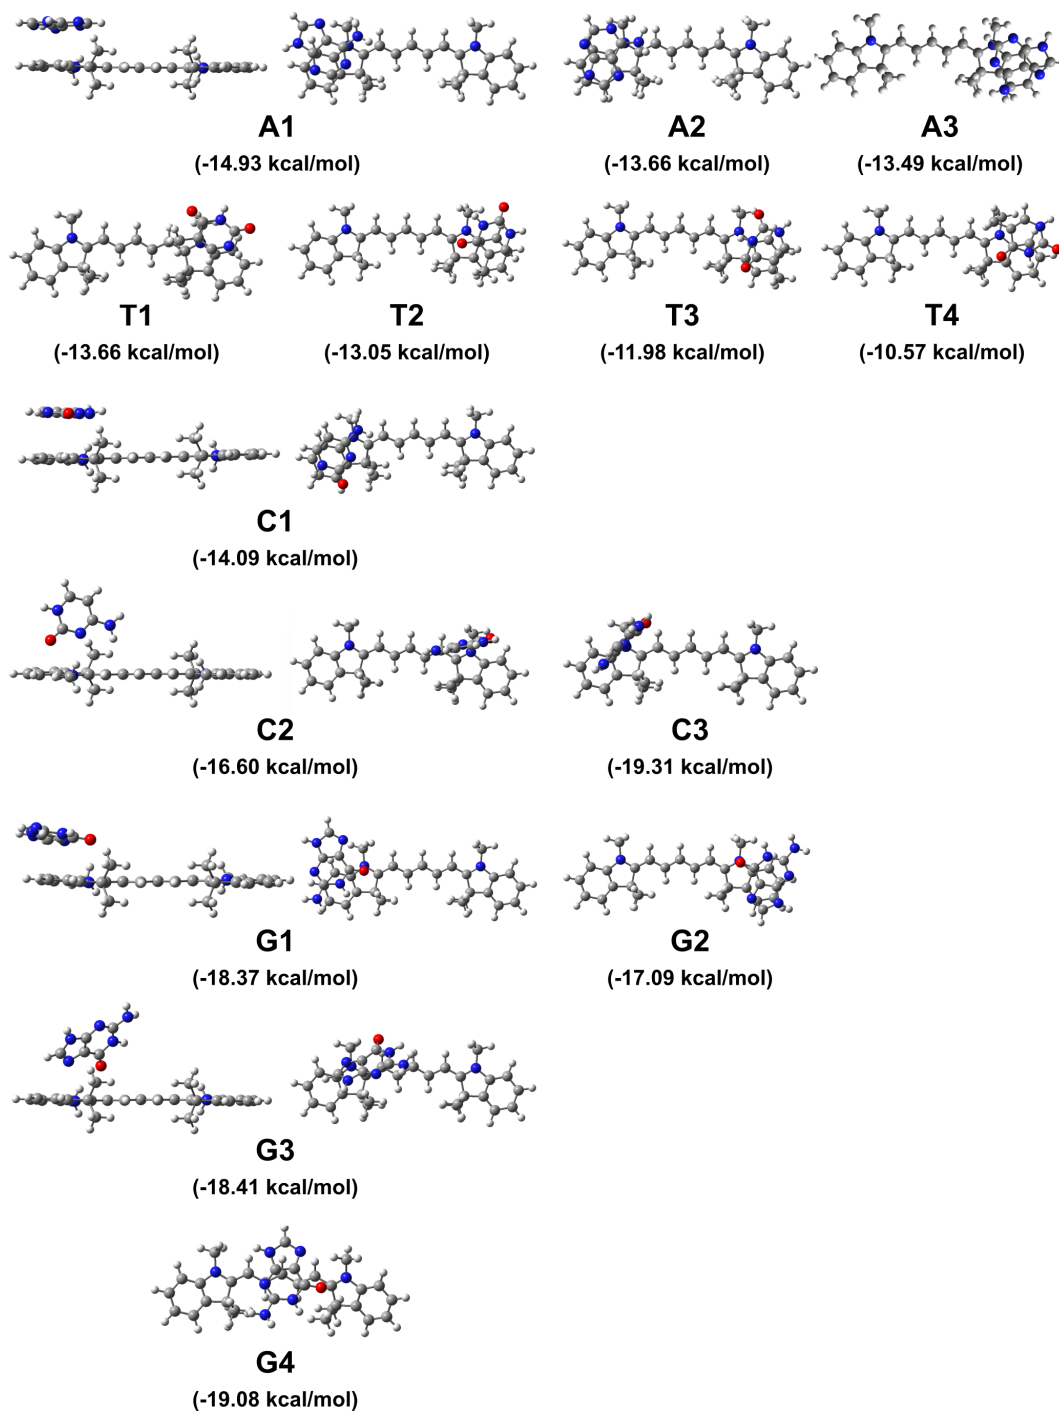

Figure S4: Molecular structures of the interaction between Cy5 and the DNA bases optimized using density functional theory (DFT). These structures represent all the different 32 optimized structures. See Table S3 for structural parameters related to stacking.



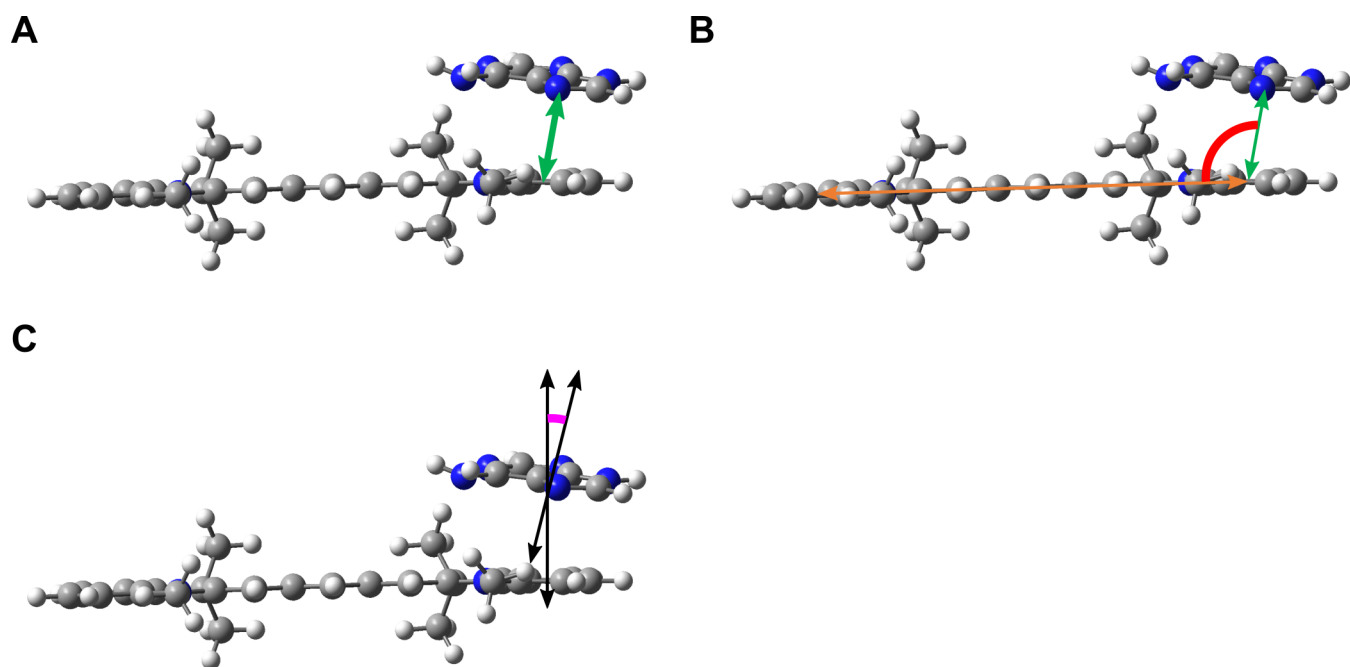

Figure S5: Definition of distances and angles for the interaction between the indole of Cy5 and the DNA bases. A) The dye-base distance was defined as the norm of the vector (green arrow) from the indole center to the base center. B) The stack angle between the indole and the base was defined as the angle (shown in red) between the long dye axis and the dye-base vector. C) The planar angle was defined as the angle (shown in pink) between the normal planes of the indole and the base.

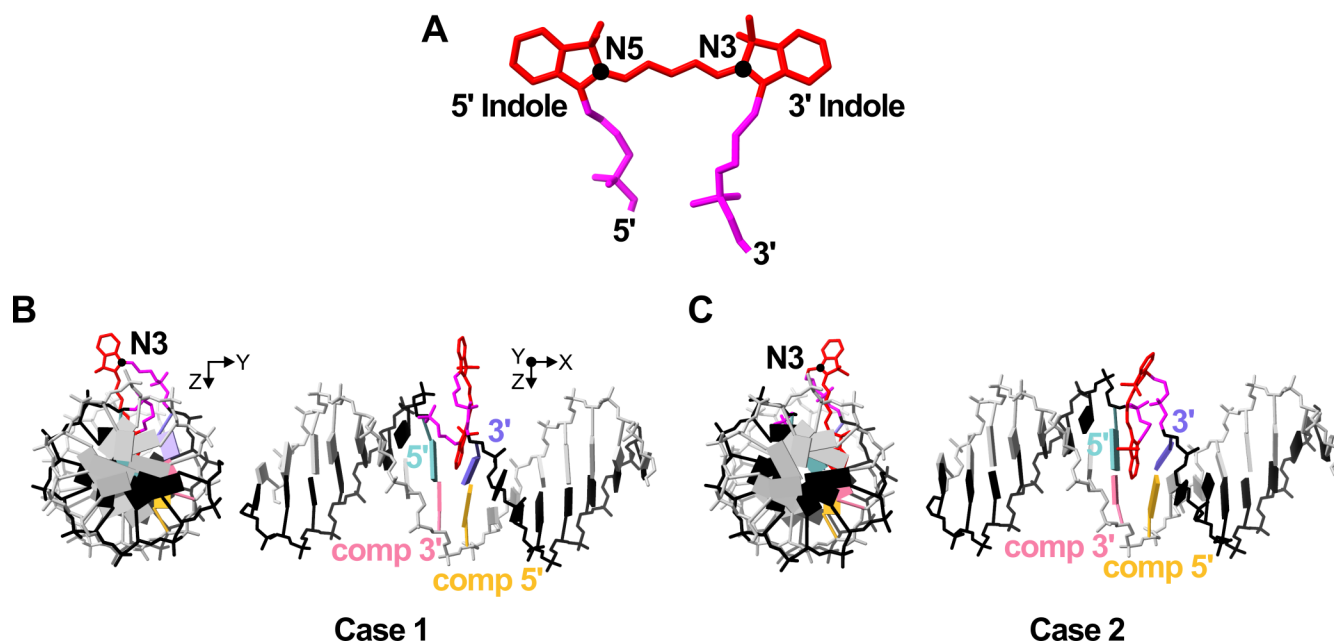

Figure S6: Initialization cases for MD simulations. A) Cy5 and the two tethers. 5' and 3' end indoles are labeled as 5' and 3' Indole. 5' and 3' end nitrogen atoms are labeled as N5 and N3. B) Initialization with 5' indole intercalated. Nitrogens are facing towards the front. C) Initialization with 5' indole intercalated. Nitrogens are facing towards the back. The 5' and 3' end flanking bases are labeled as 5' and 3' bases. The complementary 5' and 3' end flanking bases are labeled as complementary 5' and complementary 3' bases.

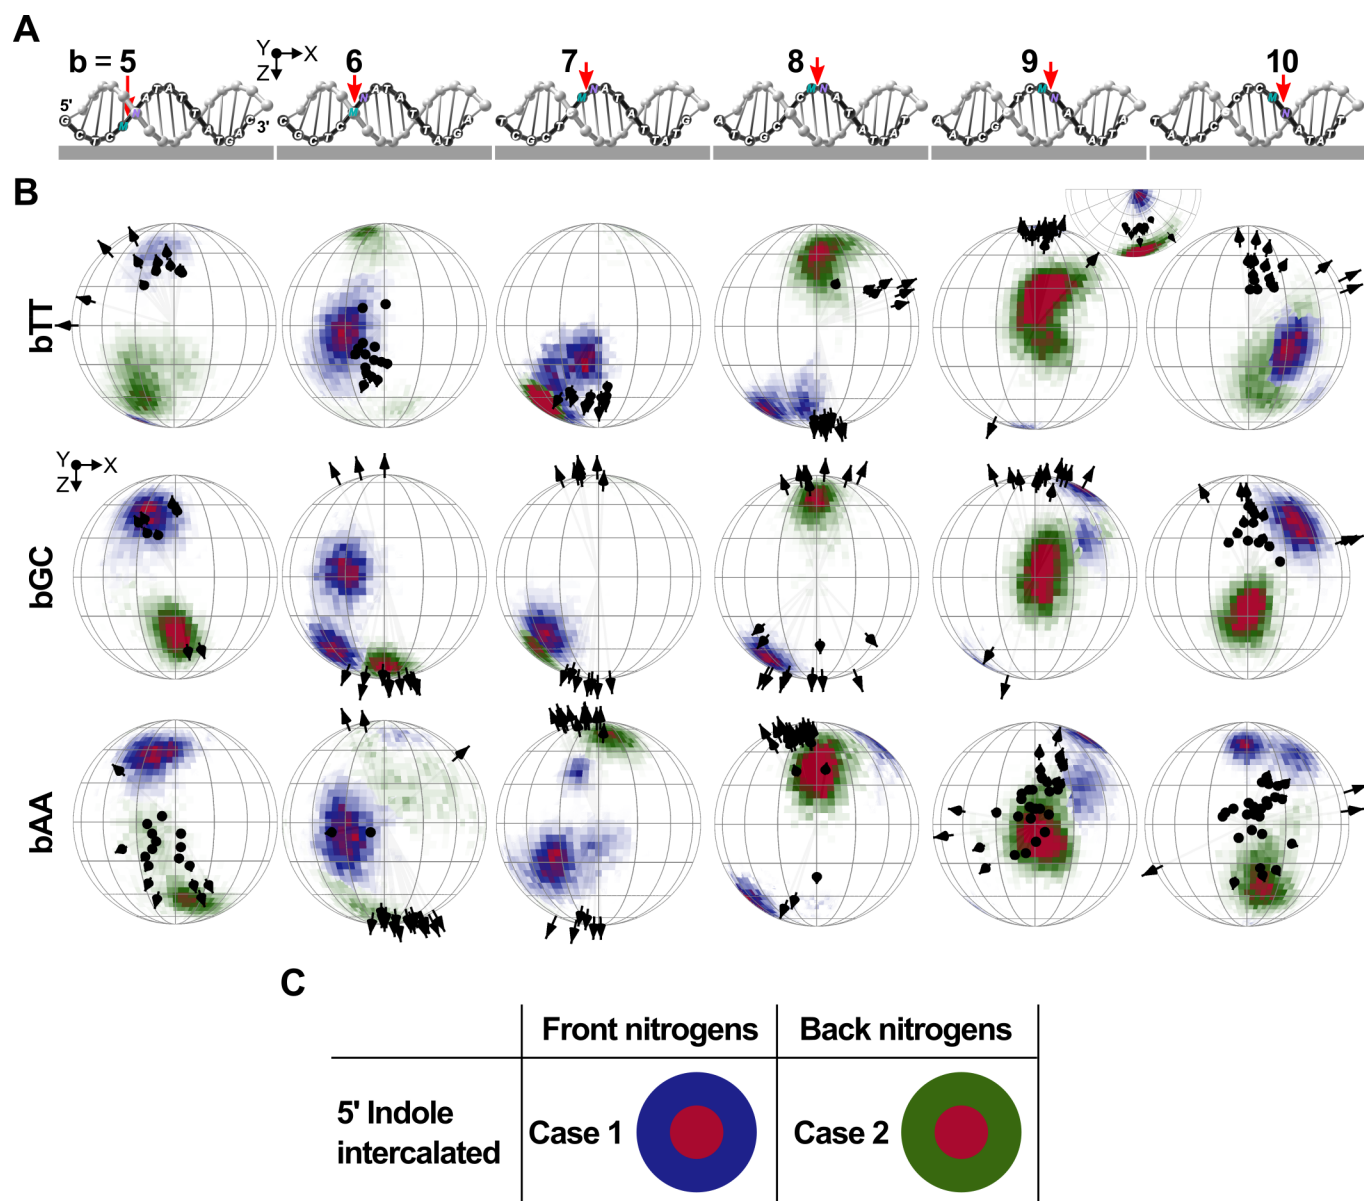

Figure S7: Simulation results when the 5' end of the Cy5 indole was intercalated.

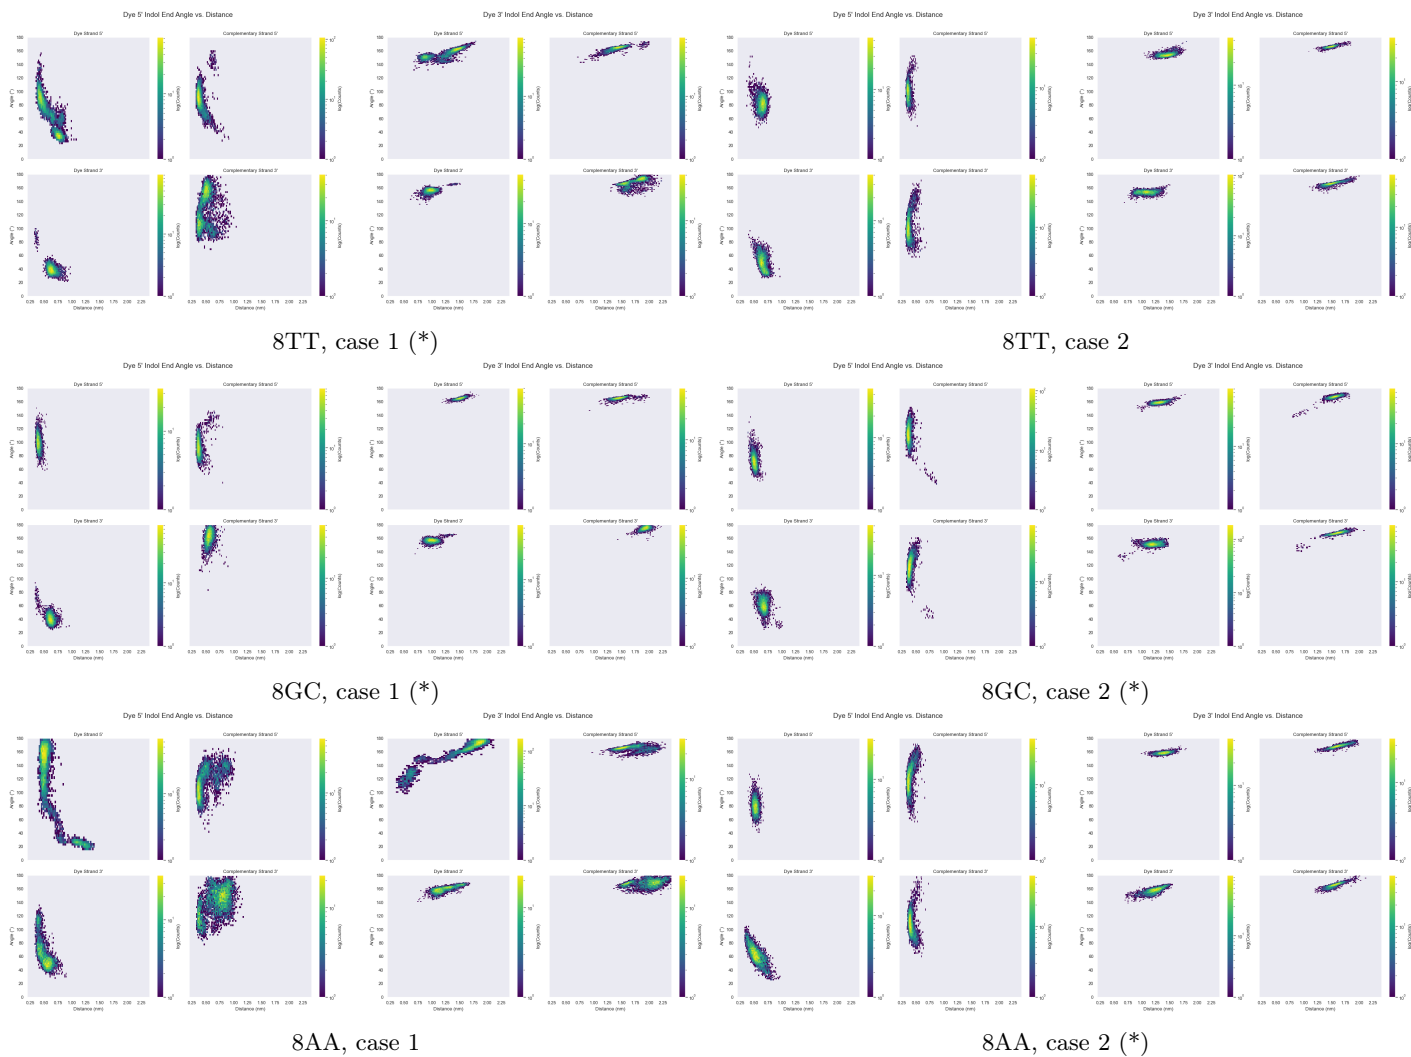

Figure S8: Interaction of the neighboring bases with the 5' and 3' end indoles of Cy5. The nomenclature conversion between these plots and the schematics in Figure S6 is as follows. Dye Strand 5' is 5' base, Dye Strand 3' is 3' base, Complementary Strand 5' is comp 5', and Complementary Strand 3' is comp 3'. The measurements in these plots are given as in the schematics in Figure S5 as follows. Angle is the stack angle, and distance is the indole center to base center distance. (\*) indicates the cases that agree with the experimental data.

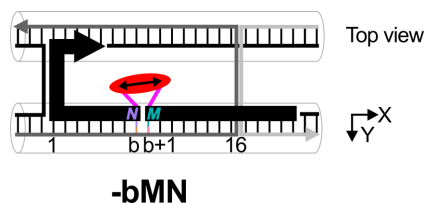

Figure S9: The design of the template for investigating the effect of the surface.

Table S4: DNA strands used for making the different DNA origami samples. As stated in the Main Text, the DNA origami was designed based on [5]. The staple strands for the DNA origami are divided in edges, body and docking sites. Staples for the DNA origami edges have polythymine sequences for passivation. The sequence of the M13mp18 scaffold can be obtained from [www.bayoubiolabs.com/productsheets/M13mp18\\_DNA\\_Sequence\\_BayouBiolabs.pdf](http://www.bayoubiolabs.com/productsheets/M13mp18_DNA_Sequence_BayouBiolabs.pdf).

| Name                | Sequence                                  | Role              |
|---------------------|-------------------------------------------|-------------------|
| Ptt-1LR2-1LR1-Ptt   | TTTTTCACGTTGAAAATCTCGCGAATAATAATTTTTTTTT  | DNA origami edges |
| Ptt-1LR4-1LR3-Ptt   | TTTAGGAAGTTTCCATTAATAAAGACTTTTTTCATGTTT   | DNA origami edges |
| Ptt-1LR6-1LR5-Ptt   | TTTCAGGCGCATAGGCTGGTGAACGGGTGTACAGACTTT   | DNA origami edges |
| Ptt-1LR8-1LR7-Ptt   | TTTGGTAGAAAAGATTCATCGAACAACATTATTACATTT   | DNA origami edges |
| Ptt-1LR10-1LR9-Ptt  | TTTTTGACCATAAATCAAAAAGTTCAGAAAAACGAGAATTT | DNA origami edges |
| Ptt-1LR12-1LR11-Ptt | TTTGTGTCTGGAAGTTTCAATGCAACTAAAGTACGTTT    | DNA origami edges |
| Ptt-1LR14-1LR13-Ptt | TTTTTTTTGCGGGAGAAGCCTATGACCCTGTAATACTTT   | DNA origami edges |
| Ptt-1LR16-1LR15-Ptt | TTTGTCAATCATATGTACCATCGTAAAACTAGCATTTT    | DNA origami edges |
| Ptt-1LR18-1LR17-Ptt | TTTGTGTAGATGGGCGCATGGGATAGGTCACGTTGTTT    | DNA origami edges |
| Ptt-1LR20-1LR19-Ptt | TTTAGTGCCAAGCTTGCATTTGTAAAACGACGGCCTTT    | DNA origami edges |
| Ptt-1LR22-1LR21-Ptt | TTTTATTGGGCGCCAGGGTGGAGAGGCGGTTTGCGTTT    | DNA origami edges |
| Ptt-1LR24-1LR23-Ptt | TTTTGGCCCACTACGTGAACCGTCTATCAGGGCGATTT    | DNA origami edges |
| Ptt-RR1-RR2-Ptt     | TTTCAGAACCGCCACCCCTCTCAGAACCGCCACCCTTTT   | DNA origami edges |
| Ptt-RR3-RR4-Ptt     | TTTATACAGGAGTGTACTGTACATGGCTTTTGATGTTT    | DNA origami edges |
| Ptt-RR5-RR6-Ptt     | TTTCGTTTGCCATCTTTTCATAGCCCCCTTATTAGTTT    | DNA origami edges |
| Ptt-RR7-RR8-Ptt     | TTTCAAAGACAAAAGGGCGTATGGTTTACCAGCGCTTT    | DNA origami edges |
| Ptt-RR9-RR10-Ptt    | TTTAGAGCAAGAAACAATGGTTAAGCCCAATAATATTT    | DNA origami edges |
| Ptt-RR11-RR12-Ptt   | TTTCAATTTTATCCTGAATATTTTGCACCCAGCTATTT    | DNA origami edges |
| Ptt-RR13-RR14-Ptt   | TTTTATCCCATCCTAATTTTGAACAAGAAAAATAATTT    | DNA origami edges |
| Ptt-RR15-RR16-Ptt   | TTTCATAATTACTAGAAAAGAATAAACACCGGAATTTT    | DNA origami edges |
| Ptt-RR17-RR18-Ptt   | TTTAATCCTTGAAAACATAATTAATTTTCCCTTAGTTT    | DNA origami edges |
| Ptt-RR19-RR20-Ptt   | TTTAGATGAATATACAGTATTTTCAGGTTTAACGTCTTT   | DNA origami edges |
| Ptt-RR21-RR22-Ptt   | TTTAGACTTTACAAACAATAGGATTTAGAAGTATTTTT    | DNA origami edges |
| Ptt-RR23-RR24-Ptt   | TTTAAAAATACCGAACGAACATAAAACATCGCCATTTTT   | DNA origami edges |
| A2-A4               | AGGCTCCAGAGGCTTTGAGGACACGGGTAA            | DNA origami body  |
| A4-A6               | AATACGTTTGAAAGAGGACAGACTGACCTT            | DNA origami body  |
| A6-A8               | CATCAAGTAAAACGAACATAACGAGTTGAGA           | DNA origami body  |
| A8-A10              | TTTAGGACAAATGCTTTTAAACAATCAGTGTC          | DNA origami body  |
| A10-A12             | TTTACCCCAACATGTTTTTAAATTTCCATAT           | DNA origami body  |
| A12-A14             | AACAGTTTTGTACCAAAAACATTTTATTTTC           | DNA origami body  |
| A14-A16             | AACGCAAAATCGATGAACGGTACCGGTTGA            | DNA origami body  |
| A16-A18             | TAATCAGCGGATTGACCGTAATCGTAACCG            | DNA origami body  |
| A18-A20             | TGCATCTTTCCCAGTCACGACGGCCTGCAG            | DNA origami body  |
| A20-A22             | GTCGACTTCGGCCAACGCGCGGGGTTTTTC            | DNA origami body  |
| A22-A24             | TTTTCACTCAAAGGGCGAAAAACCATCACC            | DNA origami body  |
| A24-B23             | CAAATCAAGTTTTTTTGGGGTCGAAACGTGGA          | DNA origami body  |
| B1-A2               | AGAAAGGAACAACATAAAGGAATTCAAAAAAA          | DNA origami body  |
| B3-B1               | ACGGCTACAAAAGGAGCCTTTAATGTGAGAAAT         | DNA origami body  |
| B5-B3               | GACCAACTAATGCCACTACGAAGGGGGTAGCA          | DNA origami body  |
| B7-B5               | TACGTTAAAGTAATCTTGACAAGAACCGAACT          | DNA origami body  |
| B9-B7               | ATCCCCCTATACCACATTCAACTAGAAAAATC          | DNA origami body  |
| B11-B9              | CTGTAGCTTGACTATTATAGTCAGTTCATTGA          | DNA origami body  |
| B13-B11             | TAAATCGGGATTCCCAATTCTGCGATATAATG          | DNA origami body  |
| B15-B13             | AACAAGAGGGATAAAAAATTTTTAGCATAAAGC         | DNA origami body  |
| B17-B15             | ACAAACGGAAAAGCCCCAAAAACACTGGAGCA          | DNA origami body  |
| B19-B17             | CCAGGGTTGCCAGTTTGAGGGGACCCGTGGGA          | DNA origami body  |
| B21-B19             | TTAATGAACTAGAGGATCCCCGGGGGGTAACG          | DNA origami body  |
| B23-B21             | CTCCAACGCAGTGAGACGGGCAACCAGCTGCA          | DNA origami body  |
| C2-C4               | TTTATCAGGACAGCATCGGAACGACACCAACC          | DNA origami body  |
| C6-C8               | TTCATTACGTCAGGACGTTGGGAAATGCAGAT          | DNA origami body  |
| C8-C10              | ACATAACGGGAATCGTCATAAATAAAGCAAAG          | DNA origami body  |
| C10-C12             | CGGATTGCAGAGCTTAATTGCTGAAACGAGTA          | DNA origami body  |
| C12-C14             | GATTTAGTCAATAAAGCCTCAGAGAACCCTCA          | DNA origami body  |
| C14-C16             | TATATTTTGTCAATTGCCTGAGAGTGGAAGATT         | DNA origami body  |
| C16-C18             | GTATAAGCCAACCCGTCGATTCTGACGACAG           | DNA origami body  |
| C18-C20             | TATCGGCCGCAAGGCGATTAAGTTTACCGAGC          | DNA origami body  |
| C20-C22             | TCGAATTTCGGGAAACCTGTTCGTGCAGCTGATT        | DNA origami body  |
| C22-C24             | GCCCTTCAGAGTCCACTATTAAAGGGTGCCGT          | DNA origami body  |

Continued on next page

Table S4 – Continued from previous page

| Name    | Sequence                           | Role             |
|---------|------------------------------------|------------------|
| C24-D23 | AAAGCACTAAATCGGAACCCCTAATCCAGTT    | DNA origami body |
| D1-C2   | ACAACCTTTCAACAGTTTCAGCGGATGTATCGG  | DNA origami body |
| D3-D1   | CAGCGAAACTTGCTTTCGAGGTGTTGCTAA     | DNA origami body |
| D5-D3   | GCGCAGACAAGAGGCCAAAAGAATCCCTCAG    | DNA origami body |
| D7-D5   | TTATACCACCAAATCAACGTAACGAACGAG     | DNA origami body |
| D9-D7   | AATACTGCCCAAAAGGAATTACGTGGCTCA     | DNA origami body |
| D11-D9  | GATGGCTTATCAAAAAGATTAAGAGCGTCC     | DNA origami body |
| D13-D11 | AAATTAAGTTGACCATTAGATACTTTTGCG     | DNA origami body |
| D15-D13 | GCTATCAGAAATGCAATGCCTGAATTAGCA     | DNA origami body |
| D17-D15 | GCGAGTAAAAATATTTAAATTGTTACAAAG     | DNA origami body |
| D19-D17 | GATGTGCTTCAGGAAGATCGCACAAATGTGA    | DNA origami body |
| D21-D19 | TTCCAGTCGTAATCATGGTCATAAAAGGGG     | DNA origami body |
| D23-D21 | TGGAACAACCGCCTGGCCCTGAGGCCCGCT     | DNA origami body |
| E2-E4   | AAACAGCTTTTTTGCGGGATCGTCAACACTAAA  | DNA origami body |
| E4-E6   | ACACTCATCCATGTTACTTAGCCGAAAGCTGC   | DNA origami body |
| E6-E8   | TCATTACAGATGCGATTTTAAGAACAGGCATAG  | DNA origami body |
| E8-E10  | TAAGAGCAAATGTTTAGACTGGATAGGAAGCC   | DNA origami body |
| E10-E12 | CGAAAGACTTTTGATAAGAGGTCATATTTTCGCA | DNA origami body |
| E12-E14 | AATGGTCAACAGGCCAAGGCAAAAGAGTAATGTG | DNA origami body |
| E14-E16 | TAGGTAAACTATTTTTGAGAGATCAAACGTTA   | DNA origami body |
| E16-E18 | ATATTTTGGCTTTCATCAACATTATCCAGCCA   | DNA origami body |
| E18-E20 | GCTTTCCGATTACGCCAGCTGGCGGCTGTTTC   | DNA origami body |
| E20-E22 | CTGTGTGATTGCGTTGCGCTCACTAGAGTTGC   | DNA origami body |
| E22-E24 | AGCAAGCGTAGGGTTGAGTGTTGTAGGGAGCC   | DNA origami body |
| F1-E2   | TAAATGAATTTTCTGTATGGGATTAATTTCTT   | DNA origami body |
| F3-F1   | AAGGCCGCTGATACCGATAGTTGCGACGTTAG   | DNA origami body |
| F5-F3   | GACCTGCTCTTTGACCCCCAGCGAGGGAGTTA   | DNA origami body |
| F7-F5   | ATTACCTTTGAATAAGGCTTGCCCAATCCGC    | DNA origami body |
| F9-F7   | ATAGTAAACACTATCATAACCTCATTTGTGA    | DNA origami body |
| F11-F9  | TTGCTCCTTTCAAATATCGCGTTTGAGGGGGT   | DNA origami body |
| F13-F11 | TAAATCATATAACCTGTTTAGCTAACCTTTAA   | DNA origami body |
| F15-F13 | GAGGGTAGGATTCAAAAGGGTGAGACATCCAA   | DNA origami body |
| F17-F15 | TGTAGCCATTAAAATTTCGCATTAAATGCCGGA  | DNA origami body |
| F19-F17 | TCTTCGCTGCACCGCTTCTGGTGCGGCCTTCC   | DNA origami body |
| F21-F19 | CACATTAAAATTGTTATCCGCTCATGCGGGCC   | DNA origami body |
| F23-F21 | GCCCCGAGAGTCCACGCTGGTTTGCAGCTAACT  | DNA origami body |
| E24-F23 | CCCGATTTAGAGCTTGACGGGGAAAAAGAATA   | DNA origami body |
| G2-G4   | TGACAACCTCGCTGAGGCTTGCAATTATACCA   | DNA origami body |
| G4-G6   | AGCGCGATGATAAATTGTGTCTGTGACGAGA    | DNA origami body |
| G6-G8   | AACACCAAATTTCAACTTTTAATCGTTTACC    | DNA origami body |
| G8-G10  | AGACGACAAAGAAGTTTGGCATAAATTCGA     | DNA origami body |
| G10-G12 | GCTTCAATCAGGATTAGAGAGTTATTTTCA     | DNA origami body |
| G12-G14 | TTTGGGGATAGTAGTAGCATTAAAAGGCCG     | DNA origami body |
| G14-G16 | GAGACAGCTAGCTGATAAATTAATTTTGT      | DNA origami body |
| G16-G18 | TAAATCAAAAATAATTCGCGTCTCGGAAACC    | DNA origami body |
| G18-G20 | AGGCAAAGGGAAGGGCGATCGGCAATTCCA     | DNA origami body |
| G20-G22 | CACAACAGGTGCCTAATGAGTGCCCAGCAG     | DNA origami body |
| G22-G24 | GCGAAAAATCCCTTATAAATCAAGCCGGCG     | DNA origami body |
| G24-I24 | AACGTGGCGAGAAAGGAAGGGAACAGTAA      | DNA origami body |
| H1-G2   | TCTAAAGTTTTGTCTCTTTCCAGCCGACAA     | DNA origami body |
| H3-I2   | ATATTCGGAACCATCGCCACGCAGAGAAGGA    | DNA origami body |
| H5-I4   | TCATCGCCAACAAAGTACAAACGACGCCAGCA   | DNA origami body |
| H7-I6   | GATGGTTTGAACGAGTAGTAAATTTACCATT    | DNA origami body |
| H9-I8   | CTTTTGCAGATAAAAAACCAAAATAAAGACTCC  | DNA origami body |
| H11-I10 | CCAACAGGAGCGAACCAGACCGGAGCCTTTAC   | DNA origami body |
| H13-I12 | TTCTACTACGCGAGCTGAAAAGGTTACCGCGC   | DNA origami body |
| H15-I14 | CAACCGTTTCAAATCACCATCAATTTCGAGCCA  | DNA origami body |
| H17-I16 | GCCATCAAGCTCATTTTTTAACCACAAATCCA   | DNA origami body |
| H19-I18 | CAACTGTTGCGCCATTTCGCCATTCAAACATCA  | DNA origami body |
| H21-I20 | AAGCCTGGTACGAGCCGGAAGCATAGATGATG   | DNA origami body |
| H23-I22 | TCGGCAAATCCTGTTTGATGGTGGACCTCAA    | DNA origami body |
| I2-H3   | TTAGGATTGGCTGAGACTCCTCAATAACCGAT   | DNA origami body |
| I4-H5   | TTGACAGGCCACCACCAGAGCCGCGATTTGTA   | DNA origami body |

Continued on next page

Table S4 – Continued from previous page

| Name    | Sequence                           | Role             |
|---------|------------------------------------|------------------|
| I6-H7   | GCAAGGCCTCACCAGTAGCACCATGGGCTTGA   | DNA origami body |
| I8-H9   | TTATTACGAAGAAGCTGGCATGATTGCGAGAGG  | DNA origami body |
| I10-H11 | AGAGAGAAAAAATGAAAATAGCAAGCAAACCT   | DNA origami body |
| I12-H13 | CCAATAGCTCATCGTAGGAATCATGGCATCAA   | DNA origami body |
| I14-H15 | GTAATAAGTTAGGCAGAGGCATTTATGATATT   | DNA origami body |
| I16-H17 | ATCGCAAGTATGTAAATGCTGATGATAGGAAC   | DNA origami body |
| I18-H19 | AGAAAACAAAGAAGATGATGAAACAGGCTGCG   | DNA origami body |
| I20-H21 | GCAATTCACATATTCCTGATTATCAAAGTGTA   | DNA origami body |
| I22-H23 | TCAATATCGAACCTCAAATATCAATTCGAAA    | DNA origami body |
| I24-J23 | TAAAAGGGACATTCTGGCCAACAAAGCATC     | DNA origami body |
| J1-H1   | TCCACAGACAGCCCTCATAGTTAGCGTAACGA   | DNA origami body |
| J3-J1   | TATTAAGAAGCGGGGTTTTGCTCGTAGCAT     | DNA origami body |
| J5-J3   | CACCAGAAAGGTTGAGGCAGGTCATGAAAG     | DNA origami body |
| J7-J5   | CAGCAAAAGGAAACGTCACCAATGAGCCGC     | DNA origami body |
| J9-J7   | ATACCCAACAGTATGTTAGCAAATTAGAGC     | DNA origami body |
| J11-J9  | TTAACGTCTAACATAAAAAACAGGTAACGGA    | DNA origami body |
| J13-J11 | TTTTATTTAAGCAAATCAGATATTTTTTGT     | DNA origami body |
| J15-J13 | CATGTAATAGAATATAAAGTACCAAGCCGT     | DNA origami body |
| J17-J15 | TATAACTAACAAAGAACGCGAGAACGCCAA     | DNA origami body |
| J19-J17 | CTGAGCAAAAATTAATTACATTTTGGGTTA     | DNA origami body |
| J21-J19 | ATTATCATTCAATATAATCCTGACAATTAC     | DNA origami body |
| J23-J21 | ACCTTGCTTGGTCAGTTGGCAAAGAGCGGA     | DNA origami body |
| K2-K4   | GCGGATAACCTATTATTCTGAAACAGACGATT   | DNA origami body |
| K4-K6   | GGCCTTGAAGAGCCACCACCCTCAGAAACCAT   | DNA origami body |
| K6-K8   | CGATAGCATTGAGCCATTTGGGAACGTAGAAA   | DNA origami body |
| K8-K10  | ATACATACCGAGGAAACGCAATAAGAAGCGCA   | DNA origami body |
| K10-K12 | TTAGACGGCCAAATAAGAAACGATAGAAGGCT   | DNA origami body |
| K12-K14 | TATCCGGTCTCATCGAGAACAAGCGACAAAAG   | DNA origami body |
| K14-K16 | GTAAGAATAATCGCCATATTTAACAAAACCTTT  | DNA origami body |
| K16-K18 | TCAAATATAACCTCCGGCTTAGGTAACAAATTT  | DNA origami body |
| K18-K20 | CATTTGAAGGCGAATTATTCATTTTTTGTGTTGG | DNA origami body |
| K20-K22 | ATTATACTAAGAAACCACCAGAAGTCAACAGT   | DNA origami body |
| K22-K24 | TGAAAGGAGCAAATGAAAAATCTAGAGATAGA   | DNA origami body |
| K24-L23 | ACCCTTCTGACCTGAAAGCGTAAGACGCTGAG   | DNA origami body |
| L1-K2   | TCACCAGTACAACTACAACGCCTAGTACCAG    | DNA origami body |
| L3-L1   | TTTCGGAAAGTGCCGTCGAGAGGGTGAGTTTCG  | DNA origami body |
| L5-L3   | CCACCCTCTATTCACAAACAAATACCTGCCTA   | DNA origami body |
| L7-L5   | TCACCGACGCACCGTAATCAGTAGCAGAACCG   | DNA origami body |
| L9-L7   | AAGGAAACATAAAGGTGGCAACATTATCACCG   | DNA origami body |
| L11-L9  | ATCCCAATGAGAATTAACCTGAACAGTTACCAG  | DNA origami body |
| L13-L11 | GTACCGCAATTCTAAGAACGCGAGTATTATTT   | DNA origami body |
| L15-L13 | AATTGAGAATTCTGTCCAGACGACTAAACCAA   | DNA origami body |
| L17-L15 | ACCTTTTTATTTTAGTTAATTTTCATAGGGCTT  | DNA origami body |
| L19-L17 | CGCGCAGATTACCTTTTTTAATGGGAGAGACT   | DNA origami body |
| L21-L19 | GCGGAACATCTGAATAATGGAAGGTACAAAAT   | DNA origami body |
| L23-L21 | AGCCAGCAATTGAGGAAGGTTATCATCATTTT   | DNA origami body |
| M2-M4   | GTATAGCAAACAGTTAATGCCCAATCCTCA     | DNA origami body |
| M4-M6   | TTAAAGCCAGAGCCGCCACCCTCGACAGAA     | DNA origami body |
| M6-M8   | TCAAGTTTCATTAAAGGTGAATATAAAAAGA    | DNA origami body |
| M8-M10  | AACGCAAGATAGCCGAACAAACCCCTGAAC     | DNA origami body |
| M10-M12 | AAAGTCACAAAATAAACAGCCAGCGTTTTTA    | DNA origami body |
| M12-M14 | CGGAACCTCCAAGAACGGGTATGACAATAA     | DNA origami body |
| M14-M16 | ACAACATGCCAACGCTCAACAGTCTTCTGA     | DNA origami body |
| M16-M18 | CCTAAATCAAAATCATAGGTCTAAACAGTA     | DNA origami body |
| M18-M20 | CATAAATCTTTGAATACCAAGTGTTAGAAC     | DNA origami body |
| M20-M22 | CTACCATAGTTTGAGTAACATTTAAATAT      | DNA origami body |
| M22-M24 | CTTTAGGGCCTGCAACAGTGCCAATACGTG     | DNA origami body |
| N1-M2   | AGGAACCCATGTACCGTAACACTTGATATAA    | DNA origami body |
| N3-N1   | GCCCGTATCCGGAATAGGTGTATCAGCCCAAT   | DNA origami body |
| N5-N3   | GCCTCCCTCAGAATGGAAAGCGCAGTAACAGT   | DNA origami body |
| N7-N5   | GAAATTATTGCCTTTAGCGTCAGACCGGAACC   | DNA origami body |
| N9-N7   | AAGTAAGCAGACACCACGGAATAATATTGACG   | DNA origami body |
| N11-N9  | GCCAGTTAGAGGGTAATTGAGCGCTTTAAGAA   | DNA origami body |

Continued on next page

Table S4 – Continued from previous page

| Name         | Sequence                                                             | Role                         |
|--------------|----------------------------------------------------------------------|------------------------------|
| N13-N11      | CTTATCATTCCCGACTTGCGGGAGCCTAATTT                                     | DNA origami body             |
| N15-N13      | AGTATAAAGTTCAGCTAATGCAGATGTCCTTC                                     | DNA origami body             |
| N17-N15      | GAATTTATTTAATGGTTTGAAATATTCTTACC                                     | DNA origami body             |
| N19-N17      | CCTGATTGCAATATATGTGAGTGATCAATAGT                                     | DNA origami body             |
| N21-N19      | ATTTTAAAATCAAAATTATTTGCACGGATTTCG                                    | DNA origami body             |
| N23-N21      | TTAACACCAGCACTAACAATAATCGTTATTA                                      | DNA origami body             |
| M24-N23      | GCACAGACAATATTTTTGAATGGGGTCAGTA                                      | DNA origami body             |
| O2-O4        | CAGGAGGTGGGGTCAGTGCCTTGAGTCTCTGA                                     | DNA origami body             |
| O4-O6        | ATTTACCGGGAACCAGAGCCACCACTGTAGCG                                     | DNA origami body             |
| O6-O8        | CGTTTTCAAGGGAGGGGAAGGTAAAGTTTATTT                                    | DNA origami body             |
| O8-O10       | TGTCACAATCTTACCGAAGCCCTTTAATATCA                                     | DNA origami body             |
| O10-O12      | GAGAGATAGAGCGTCTTTCCAGAGGTTTTGAA                                     | DNA origami body             |
| O12-O14      | GCCTTAAACCAATCAATAATCGGCACGCGCCT                                     | DNA origami body             |
| O14-O16      | GTTTATCAATATGCGTTATACAAACCGACCGT                                     | DNA origami body             |
| O16-O18      | GTGATAAAAAGACGCTGAGAAGAGATAACCTT                                     | DNA origami body             |
| O18-O20      | GCTTCTGTTCGGGAGAAACAATAACGTAAAC                                      | DNA origami body             |
| O20-O22      | AGAAATAAAAATCCTTTGCCCCGAAAGATTAGA                                    | DNA origami body             |
| O22-O24      | GCCGTCAAAAACAGAGGTGAGGCCTATTAGT                                      | DNA origami body             |
| O24-P23      | CTTTAATGCGCGAACTGATAGCCCCACCAG                                       | DNA origami body             |
| P1-O2        | CCACCCTCATTTTCAGGGATAGCAACCGTACT                                     | DNA origami body             |
| P3-P1        | GTTTTAACTTAGTACCGCCACCCAGAGCCA                                       | DNA origami body             |
| P5-P3        | AAATCACCTTCCAGTAAGCGTCAGTAATAA                                       | DNA origami body             |
| P7-P5        | ACCGATTGTCGGCATTTCGGGTCATAATCA                                       | DNA origami body             |
| P9-P7        | AATAGCTATCAATAGAAAATTCAACATTCA                                       | DNA origami body             |
| P11-P9       | ACGCTAACACCCACAAGAATTGAAAATAGC                                       | DNA origami body             |
| P13-P11      | TGTAGAAATCAAGATTAGTTGCTCTTACCA                                       | DNA origami body             |
| P15-P13      | TTAGTATCACAAATAGATAAGTCCACGAGCA                                      | DNA origami body             |
| P17-P15      | CTTAGATTTAAGGCGTTAAATAAAGCCTGT                                       | DNA origami body             |
| P19-P17      | CTTTTACAAAATCGTCGCTATTAGCAGTAG                                       | DNA origami body             |
| P21-P19      | CTCGTATTAGAAAATTGCGTAGATACAGTAC                                      | DNA origami body             |
| P23-P21      | CAGAAGATTAGATAATACATTTGTGCGACAA                                      | DNA origami body             |
| A2-A4-zPS3   | AGGCTCCAGAGGCTTTGAGGACACGGGTAATTGGGAGGA                              | DNA origami docking sites    |
| A10-A12-zPS3 | TTTACCCCAACATGTTTTAAATTTCCATATTTGGGAGGA                              | DNA origami docking sites    |
| A18-A20-zPS3 | TGCATCTTTCCCAGTCACGACGGCCTGCAGTTGGGAGGA                              | DNA origami docking sites    |
| G2-G4-zPS3   | TGACAACCTCGCTGAGGCTTGCAATTATACCATTGGGAGGA                            | DNA origami docking sites    |
| K2-K4-zPS3   | GCGGATAACCTATTATTCTGAAACAGACGATTTTGGGAGGA                            | DNA origami docking sites    |
| M6-M8-zPS3   | TCAAGTTTCATTAAAGGTGAATATAAAAGATTGGGAGGA                              | DNA origami docking sites    |
| M14-M16-zPS3 | ACAACATGCCAACGCTCAACAGTCTTCTGATTGGGAGGA                              | DNA origami docking sites    |
| O2-O4-zPS3   | CAGGAGGTGGGGTCAGTGCCTTGAGTCTCTGATTGGGAGGA                            | DNA origami docking sites    |
| O10-O12-zPS3 | GAGAGATAGAGCGTCTTTCCAGAGGTTTTGAATTGGGAGGA                            | DNA origami docking sites    |
| O18-O20-zPS3 | GCTTCTGTTCGGGAGAAACAATAACGTAAACTTGGGAGGA                             | DNA origami docking sites    |
| PS3          | TCCTCCC/Cy3b/                                                        | DNA-PAINT imager strand      |
| bAA-Cy5      | ATATAATCGCTCA/Cy5/AATATTATGACTG                                      | Cy5-tethered strand          |
| bGC-Cy5      | ATATAATCGCTCG/Cy5/CATATTATGACTG                                      | Cy5-tethered strand          |
| bTT-Cy5      | ATATAATCGCTCT/Cy5/TATATTATGACTG                                      | Cy5-tethered strand          |
| 5AA-seam     | CCATCAATGATTATATGTAATAAGGTCATAATATTTGAGCATG<br>ATATTCAACCGTTTCAAATCA | Replaces H13-I12 and I12-H13 |
| 5AA-staple   | TATAACTAACAAAGAACGCGAGAACGCCAACATGTACAAGAAT<br>ATAAAGTACCAAGCCGT     | Replaces J15-J13 and J13-J11 |
| 6AA-seam     | CCATCAATATTATATAGTAATAAGTCATAATATTTGAGCGATG<br>ATATTCAACCGTTTCAAATCA | Replaces H13-I12 and I12-H13 |
| 6AA-staple   | TATAACTAACAAAGAACGCGAGAACGCCAACATGTCAGAGAAT<br>ATAAAGTACCAAGCCGT     | Replaces J15-J13 and J13-J11 |
| 7AA-seam     | CCATCAATTTATATCAGTAATAAGCATAATATTTGAGCGAATG<br>ATATTCAACCGTTTCAAATCA | Replaces H13-I12 and I12-H13 |
| 7AA-staple   | TATAACTAACAAAGAACGCGAGAACGCCAACATGCAGTAGAAT<br>ATAAAGTACCAAGCCGT     | Replaces J15-J13 and J13-J11 |
| 8AA-seam     | CCATCAATTATATCCAGTAATAAGATAATATTTGAGCGATATG<br>ATATTCAACCGTTTCAAATCA | Replaces H13-I12 and I12-H13 |
| 8AA-staple   | TATAACTAACAAAGAACGCGAGAACGCCAACATCAGTCAGAAT<br>ATAAAGTACCAAGCCGT     | Replaces J15-J13 and J13-J11 |
| 9AA-seam     | CCATCAATATATGCCAGTAATAAGTAATATTTGAGCGATTATG<br>ATATTCAACCGTTTCAAATCA | Replaces H13-I12 and I12-H13 |

Continued on next page

Table S4 – Continued from previous page

| Name        | Sequence                                                             | Role                         |
|-------------|----------------------------------------------------------------------|------------------------------|
| 9AA-staple  | TATAACTAACAAAGAACGCGAGAACGCCAACACAGTCAAGAAT<br>ATAAAGTACCAAGCCGT     | Replaces J15-J13 and J13-J11 |
| 10AA-seam   | CCATCAATTATAGCCAGTAATAAGAATATTTGAGCGATTAATG<br>ATATTCAACCGTTTCAAATCA | Replaces H13-I12 and I12-H13 |
| 10AA-staple | TATAACTAACAAAGAACGCGAGAACGCCAACACAGTCATAGAAT<br>ATAAAGTACCAAGCCGT    | Replaces J15-J13 and J13-J11 |
| 5GC-seam    | CCATCAATGATTATATGTAATAAGGTCATAATATGCGAGCATG<br>ATATTCAACCGTTTCAAATCA | Replaces H13-I12 and I12-H13 |
| 5GC-staple  | TATAACTAACAAAGAACGCGAGAACGCCAACATGTACAAGAAT<br>ATAAAGTACCAAGCCGT     | Replaces J15-J13 and J13-J11 |
| 6GC-seam    | CCATCAATATTATATAGTAATAAGTCATAATATGCGAGCGATG<br>ATATTCAACCGTTTCAAATCA | Replaces H13-I12 and I12-H13 |
| 6GC-staple  | TATAACTAACAAAGAACGCGAGAACGCCAACATGTCAGAGAAT<br>ATAAAGTACCAAGCCGT     | Replaces J15-J13 and J13-J11 |
| 7GC-seam    | CCATCAATTTATATCAGTAATAAGCATAATATGCGAGCGAATG<br>ATATTCAACCGTTTCAAATCA | Replaces H13-I12 and I12-H13 |
| 7GC-staple  | TATAACTAACAAAGAACGCGAGAACGCCAACATGCAGTAGAAT<br>ATAAAGTACCAAGCCGT     | Replaces J15-J13 and J13-J11 |
| 8GC-seam    | CCATCAATTATATCCAGTAATAAGATAATATGCGAGCGATATG<br>ATATTCAACCGTTTCAAATCA | Replaces H13-I12 and I12-H13 |
| 8GC-staple  | TATAACTAACAAAGAACGCGAGAACGCCAACATCAGTCAGAAT<br>ATAAAGTACCAAGCCGT     | Replaces J15-J13 and J13-J11 |
| 9GC-seam    | CCATCAATATATGCCAGTAATAAGTAATATGCGAGCGATTATG<br>ATATTCAACCGTTTCAAATCA | Replaces H13-I12 and I12-H13 |
| 9GC-staple  | TATAACTAACAAAGAACGCGAGAACGCCAACACAGTCAAGAAT<br>ATAAAGTACCAAGCCGT     | Replaces J15-J13 and J13-J11 |
| 10GC-seam   | CCATCAATTATAGCCAGTAATAAGAATATGCGAGCGATTAATG<br>ATATTCAACCGTTTCAAATCA | Replaces H13-I12 and I12-H13 |
| 10GC-staple | TATAACTAACAAAGAACGCGAGAACGCCAACACAGTCATAGAAT<br>ATAAAGTACCAAGCCGT    | Replaces J15-J13 and J13-J11 |
| 5TT-seam    | CCATCAATGATTATATGTAATAAGGTCATAATATAAGAGCATG<br>ATATTCAACCGTTTCAAATCA | Replaces H13-I12 and I12-H13 |
| 5TT-staple  | TATAACTAACAAAGAACGCGAGAACGCCAACATGTACAAGAAT<br>ATAAAGTACCAAGCCGT     | Replaces J15-J13 and J13-J11 |
| 6TT-seam    | CCATCAATATTATATAGTAATAAGTCATAATATAAGAGCGATG<br>ATATTCAACCGTTTCAAATCA | Replaces H13-I12 and I12-H13 |
| 6TT-staple  | TATAACTAACAAAGAACGCGAGAACGCCAACATGTCAGAGAAT<br>ATAAAGTACCAAGCCGT     | Replaces J15-J13 and J13-J11 |
| 7TT-seam    | CCATCAATTTATATCAGTAATAAGCATAATATAAGAGCGAATG<br>ATATTCAACCGTTTCAAATCA | Replaces H13-I12 and I12-H13 |
| 7TT-staple  | TATAACTAACAAAGAACGCGAGAACGCCAACATGCAGTAGAAT<br>ATAAAGTACCAAGCCGT     | Replaces J15-J13 and J13-J11 |
| 8TT-seam    | CCATCAATTATATCCAGTAATAAGATAATATAAGAGCGATATG<br>ATATTCAACCGTTTCAAATCA | Replaces H13-I12 and I12-H13 |
| 8TT-staple  | TATAACTAACAAAGAACGCGAGAACGCCAACATCAGTCAGAAT<br>ATAAAGTACCAAGCCGT     | Replaces J15-J13 and J13-J11 |
| 9TT-seam    | CCATCAATATATGCCAGTAATAAGTAATATAAGAGCGATTATG<br>ATATTCAACCGTTTCAAATCA | Replaces H13-I12 and I12-H13 |
| 9TT-staple  | TATAACTAACAAAGAACGCGAGAACGCCAACACAGTCAAGAAT<br>ATAAAGTACCAAGCCGT     | Replaces J15-J13 and J13-J11 |
| 10TT-seam   | CCATCAATTATAGCCAGTAATAAGAATATAAGAGCGATTAATG<br>ATATTCAACCGTTTCAAATCA | Replaces H13-I12 and I12-H13 |
| 10TT-staple | TATAACTAACAAAGAACGCGAGAACGCCAACACAGTCATAGAAT<br>ATAAAGTACCAAGCCGT    | Replaces J15-J13 and J13-J11 |
| -5GC-seam   | CCATCAATATATGCGAGCGATTATTTAGGCAGCAGTCATAATG<br>ATATTCAACCGTTTCAAATCA | Replaces H13-I12 and I12-H13 |
| -5GC-staple | TATAACTAACAAAGAACGCGAGAACGCCAACATGTAATATAAT<br>ATAAAGTACCAAGCCGT     | Replaces J15-J13 and J13-J11 |
| -6GC-seam   | CCATCAATAATATGCGAGCGATTATTAGGCAGACAGTCATATG<br>ATATTCAACCGTTTCAAATCA | Replaces H13-I12 and I12-H13 |
| -6GC-staple | TATAACTAACAAAGAACGCGAGAACGCCAACATGTAATTATAT<br>ATAAAGTACCAAGCCGT     | Replaces J15-J13 and J13-J11 |

Continued on next page



Table S4 – Continued from previous page

| Name          | Sequence                                                             | Role                         |
|---------------|----------------------------------------------------------------------|------------------------------|
| -7GC-seam     | CCATCAATTAATATGCGAGCGATTTTAGGCAGAGCAGTCAATG<br>ATATTCAACCGTTTCAAATCA | Replaces H13-I12 and I12-H13 |
| -7GC-staple   | TATAACTAACAAAGAACGCGAGAACGCCAACATGTAATATATT<br>ATAAAGTACCAAGCCGT     | Replaces J15-J13 and J13-J11 |
| -8GC-seam     | CCATCAATATAATATGCGAGCGATTTAGGCAGAGGCAGTCATG<br>ATATTCAACCGTTTCAAATCA | Replaces H13-I12 and I12-H13 |
| -8GC-staple   | TATAACTAACAAAGAACGCGAGAACGCCAACATGTAATTATAT<br>ATAAAGTACCAAGCCGT     | Replaces J15-J13 and J13-J11 |
| -8GC-seam     | CCATCAATATAATATGCGAGCGATTTAGGCAGAGGCAGTCATG<br>ATATTCAACCGTTTCAAATCA | Replaces H13-I12 and I12-H13 |
| -8GC-staple   | TATAACTAACAAAGAACGCGAGAACGCCAACATGTAATTATAT<br>ATAAAGTACCAAGCCGT     | Replaces J15-J13 and J13-J11 |
| -9GC-seam     | CCATCAATCATAATATGCGAGCGATTAGGCAGAGGCCAGTATG<br>ATATTCAACCGTTTCAAATCA | Replaces H13-I12 and I12-H13 |
| -9GC-staple   | TATAACTAACAAAGAACGCGAGAACGCCAACATGTAATTTATA<br>TTAAAGTACCAAGCCGT     | Replaces J15-J13 and J13-J11 |
| -10GC-seam    | CCATCAATTCATAATATGCGAGCGTTAGGCAGAGGCACAGATG<br>ATATTCAACCGTTTCAAATCA | Replaces H13-I12 and I12-H13 |
| -10GC-staple  | TATAACTAACAAAGAACGCGAGAACGCCAACATGTAATATTAT<br>ATAAAGTACCAAGCCGT     | Replaces J15-J13 and J13-J11 |
| -5TT-seam     | CCATCAATATATAAGAGCGATTATTTAGGCAGCAGTCATAATG<br>ATATTCAACCGTTTCAAATCA | Replaces H13-I12 and I12-H13 |
| -5TT-staple   | TATAACTAACAAAGAACGCGAGAACGCCAACATGTAATATAAT<br>ATAAAGTACCAAGCCGT     | Replaces J15-J13 and J13-J11 |
| -6TT-seam     | CCATCAATAATATAAGAGCGATTATTAGGCAGACAGTCATATG<br>ATATTCAACCGTTTCAAATCA | Replaces H13-I12 and I12-H13 |
| -6TT-staple   | TATAACTAACAAAGAACGCGAGAACGCCAACATGTAATTATAT<br>ATAAAGTACCAAGCCGT     | Replaces J15-J13 and J13-J11 |
| -7TT-seam     | CCATCAATTAATATAAGAGCGATTTTAGGCAGAGCAGTCAATG<br>ATATTCAACCGTTTCAAATCA | Replaces H13-I12 and I12-H13 |
| -7TT-staple   | TATAACTAACAAAGAACGCGAGAACGCCAACATGTAATATATT<br>ATAAAGTACCAAGCCGT     | Replaces J15-J13 and J13-J11 |
| -8TT-seam     | CCATCAATATAATATAAGAGCGATTTAGGCAGAGGCAGTCATG<br>ATATTCAACCGTTTCAAATCA | Replaces H13-I12 and I12-H13 |
| -8TT-staple   | TATAACTAACAAAGAACGCGAGAACGCCAACATGTAATTATAT<br>ATAAAGTACCAAGCCGT     | Replaces J15-J13 and J13-J11 |
| -9TT-seam     | CCATCAATCATAATATAAGAGCGATTAGGCAGAGGCCAGTATG<br>ATATTCAACCGTTTCAAATCA | Replaces H13-I12 and I12-H13 |
| -9TT-staple   | TATAACTAACAAAGAACGCGAGAACGCCAACATGTAATTTATA<br>TTAAAGTACCAAGCCGT     | Replaces J15-J13 and J13-J11 |
| -10TT-seam    | CCATCAATTCATAATATAAGAGCGTTAGGCAGAGGCACAGATG<br>ATATTCAACCGTTTCAAATCA | Replaces H13-I12 and I12-H13 |
| -10TT-staple  | TATAACTAACAAAGAACGCGAGAACGCCAACATGTAATATTAT<br>ATAAAGTACCAAGCCGT     | Replaces J15-J13 and J13-J11 |
| 6GC/1A-seam   | CCATCAATATTATATAGTAATAAGCATAATATGACGAGCGATG<br>ATATTCAACCGTTTCAAATCA | Replaces H13-I12 and I12-H13 |
| 6GC/1A-staple | TATAACTAACAAAGAACGCGAGAACGCCAACATGCAGTAGAAT<br>ATAAAGTACCAAGCCGT     | Replaces J15-J13 and J13-J11 |
| 6GC/2A-seam   | CCATCAATTTATATCAGTAATAAGATAATATGAACGAGCGATG<br>ATATTCAACCGTTTCAAATCA | Replaces H13-I12 and I12-H13 |
| 6GC/2A-staple | TATAACTAACAAAGAACGCGAGAACGCCAACATCAGTCAGAAT<br>ATAAAGTACCAAGCCGT     | Replaces J15-J13 and J13-J11 |
| 6GC/3A-seam   | CCATCAATATTATATAGTAATAAGTAATATGAAACGAGCGATG<br>ATATTCAACCGTTTCAAATCA | Replaces H13-I12 and I12-H13 |
| 6GC/3A-staple | TATAACTAACAAAGAACGCGAGAACGCCAACACAGTCAAGAAT<br>ATAAAGTACCAAGCCGT     | Replaces J15-J13 and J13-J11 |
| 6GC/4A-seam   | CCATCAATATTATATAGTAATAAGAATATGAAAACGAGCGATG<br>ATATTCAACCGTTTCAAATCA | Replaces H13-I12 and I12-H13 |
| 6GC/4A-staple | TATAACTAACAAAGAACGCGAGAACGCCAACACAGTCATAGAAT<br>ATAAAGTACCAAGCCGT    | Replaces J15-J13 and J13-J11 |
| 6GC/5A-seam   | CCATCAATATTATATAGTAATAAGATATGAAAAACGAGCGATG<br>ATATTCAACCGTTTCAAATCA | Replaces H13-I12 and I12-H13 |

Continued on next page

Table S4 – *Continued from previous page*

| Name          | Sequence                                                             | Role                         |
|---------------|----------------------------------------------------------------------|------------------------------|
| 6GC/5A-staple | TATAACTAACAAAGAACGCGAGAACGCCAACAGTCATAAGAAT<br>ATAAAGTACCAAGCCGT     | Replaces J15-J13 and J13-J11 |
| 6GC/6A-seam   | CCATCAATATTATATAGTAATAAGTATGAAAAAACGAGCGATG<br>ATATTCAACCGTTTCAAATCA | Replaces H13-I12 and I12-H13 |
| 6GC/6A-staple | TATAACTAACAAAGAACGCGAGAACGCCACAGTCATAAGAAT<br>ATAAAGTACCAAGCCGT      | Replaces J15-J13 and J13-J11 |
| 6GC/7A-seam   | CCATCAATATTATATAGTAATAAGATGAAAAAACGAGCGATG<br>ATATTCAACCGTTTCAAATCA  | Replaces H13-I12 and I12-H13 |
| 6GC/7A-staple | TATAACTAACAAAGAACGCGAGAACGCCCAGTCATAATAGAAT<br>ATAAAGTACCAAGCCGT     | Replaces J15-J13 and J13-J11 |
| 6GC/8A-seam   | CCATCAATATTATATAGTAATAAGTGAAAAAACGAGCGATG<br>ATATTCAACCGTTTCAAATCA   | Replaces H13-I12 and I12-H13 |
| 6GC/8A-staple | TATAACTAACAAAGAACGCGAGAACGCCAGTCATAATAAGAAT<br>ATAAAGTACCAAGCCGT     | Replaces J15-J13 and J13-J11 |

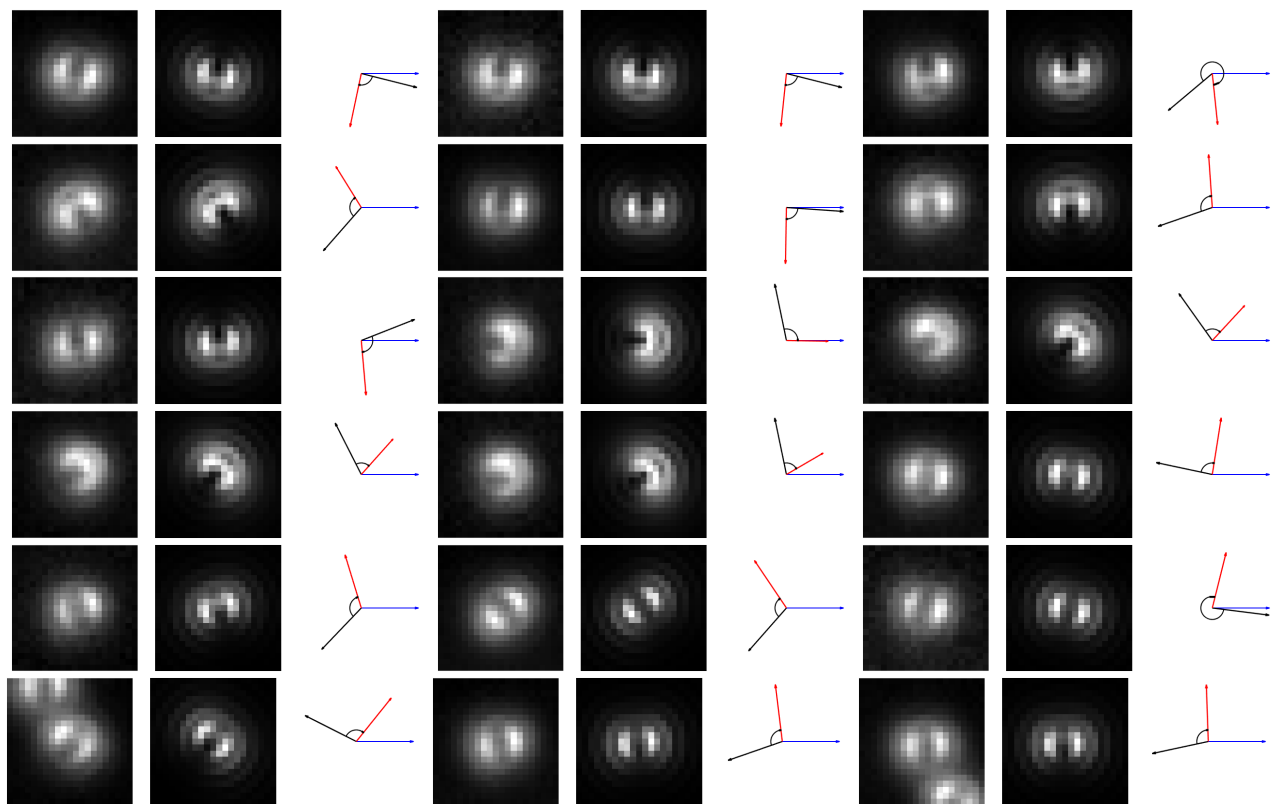

Figure S10: Each set of three sub-figures show the experimental dipole radiation pattern (left), simulated pattern (center) and in-plane orientations (right) in sample **5AA**. X axis, DNA origami, and in-plane dipole orientation are represented by the blue, black and red arrows, respectively. Z axis points towards the image. The in-plane dipole orientation is the projection of half of the double-headed arrow on the plane, and its length is  $\sin(\theta)$ . The black curved arrow represents the angle of the dipole relative to the origami ( $\phi$ ). The lengths of the black and blue arrows are 1. The lengths of the black and blue arrows are 1. The defocused distance in the simulations was 550 nm.

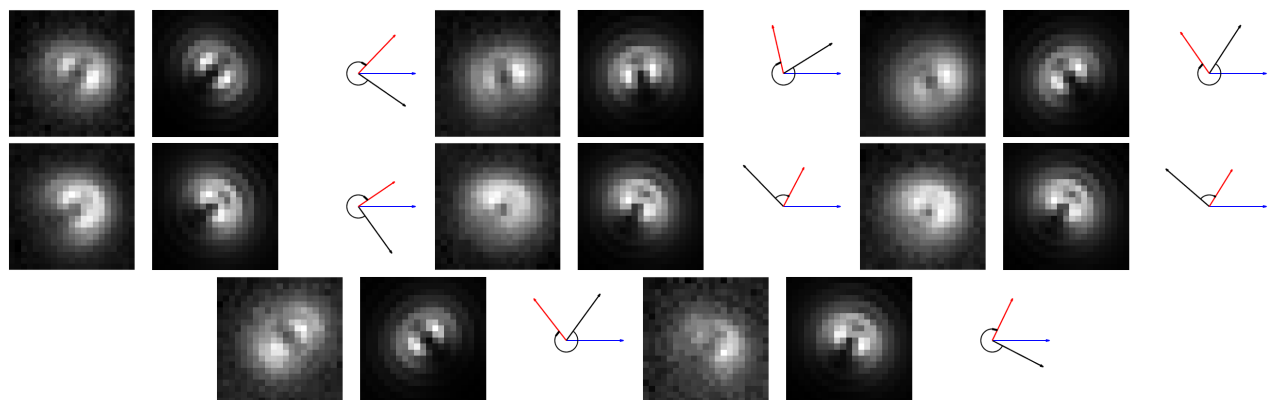

Figure S11: Each set of three sub-figures show the experimental dipole radiation pattern (left), simulated pattern (center) and in-plane orientations (right) in sample **5GC**. X axis, DNA origami, and in-plane dipole orientation are represented by the blue, black and red arrows, respectively. Z axis points towards the image. The in-plane dipole orientation is the projection of half of the double-headed arrow on the plane, and its length is  $\sin(\theta)$ . The black curved arrow represents the angle of the dipole relative to the origami ( $\phi$ ). The lengths of the black and blue arrows are 1. The lengths of the black and blue arrows are 1. The defocused distance in the simulations was 600 nm.

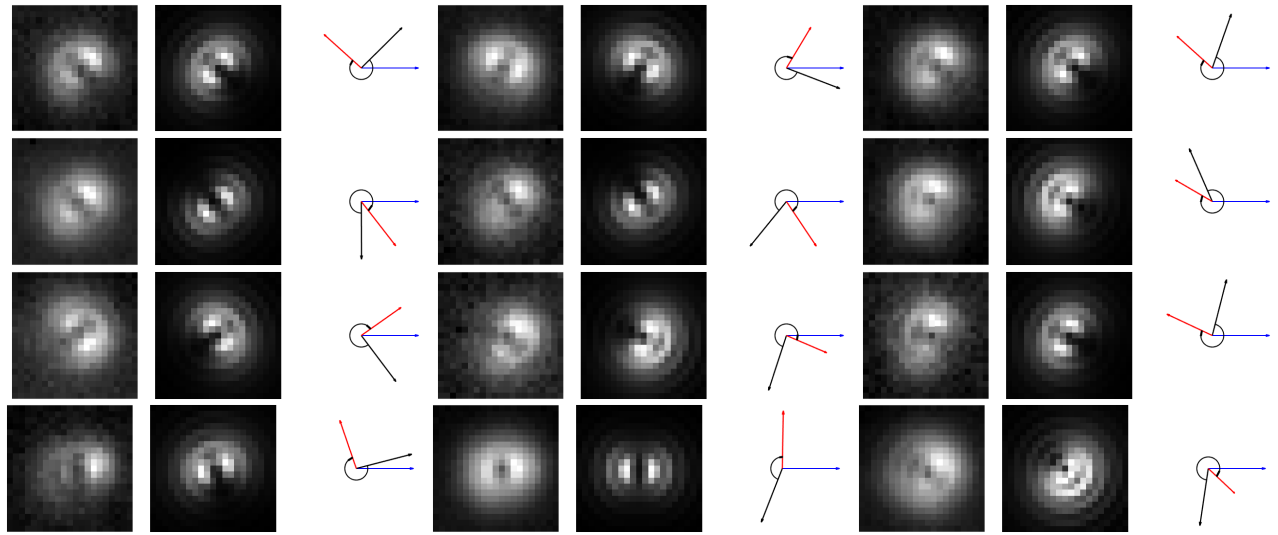

Figure S12: Each set of three sub-figures show the experimental dipole radiation pattern (left), simulated pattern (center) and in-plane orientations (right) in sample **5TT**. X axis, DNA origami, and in-plane dipole orientation are represented by the blue, black and red arrows, respectively. Z axis points towards the image. The in-plane dipole orientation is the projection of half of the double-headed arrow on the plane, and its length is  $\sin(\theta)$ . The black curved arrow represents the angle of the dipole relative to the origami ( $\phi$ ). The lengths of the black and blue arrows are 1. The lengths of the black and blue arrows are 1. The defocused distance in the simulations was 600 nm.

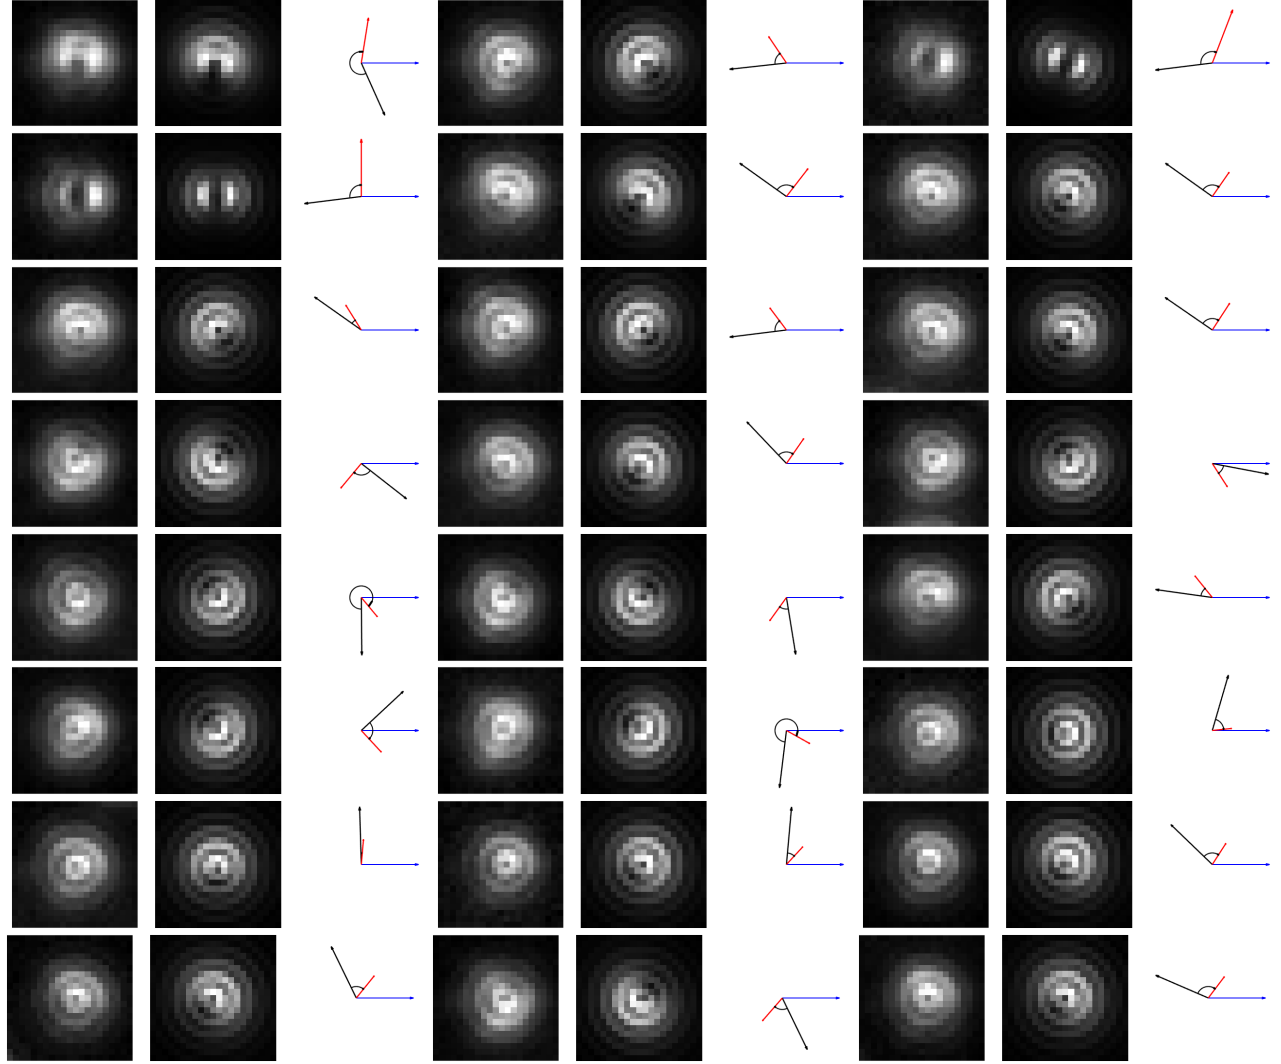

Figure S13: Each set of three sub-figures show the experimental dipole radiation pattern (left), simulated pattern (center) and in-plane orientations (right) in sample **6AA**. X axis, DNA origami, and in-plane dipole orientation are represented by the blue, black and red arrows, respectively. Z axis points towards the image. The in-plane dipole orientation is the projection of half of the double-headed arrow on the plane, and its length is  $\sin(\theta)$ . The black curved arrow represents the angle of the dipole relative to the origami ( $\phi$ ). The lengths of the black and blue arrows are 1. The defocused distance in the simulations was 575 nm.

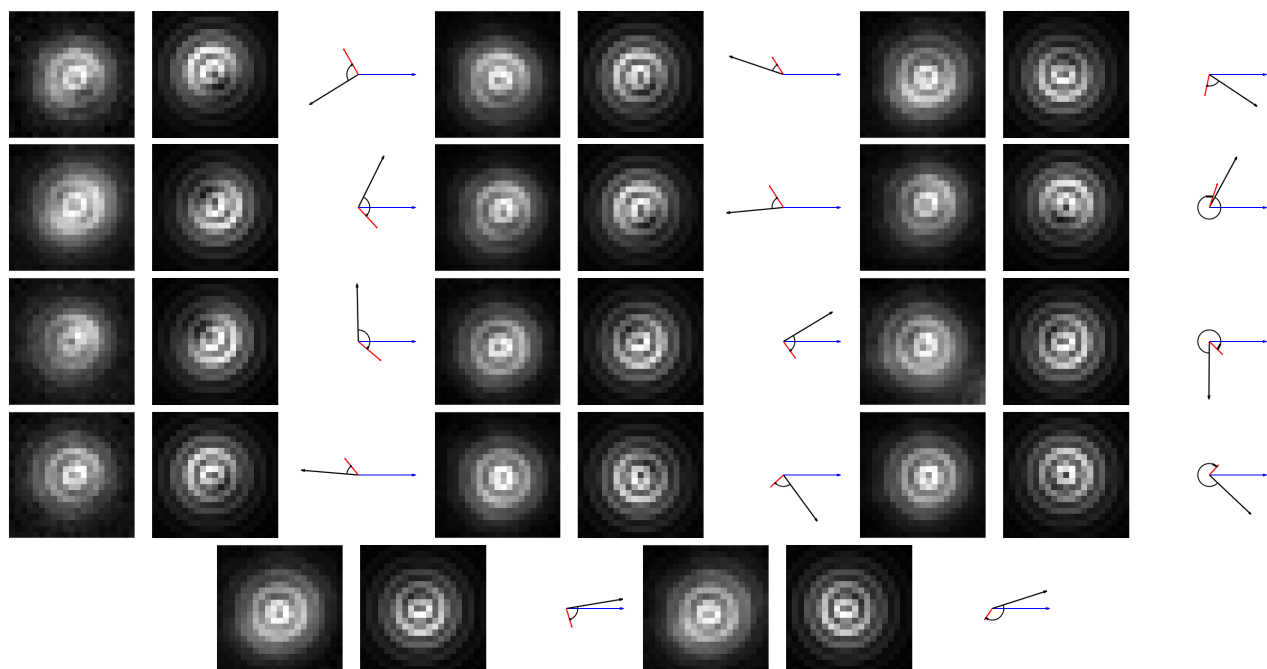

Figure S14: Each set of three sub-figures show the experimental dipole radiation pattern (left), simulated pattern (center) and in-plane orientations (right) in sample **6GC**. X axis, DNA origami, and in-plane dipole orientation are represented by the blue, black and red arrows, respectively. Z axis points towards the image. The in-plane dipole orientation is the projection of half of the double-headed arrow on the plane, and its length is  $\sin(\theta)$ . The black curved arrow represents the angle of the dipole relative to the origami ( $\phi$ ). The lengths of the black and blue arrows are 1. The defocused distance in the simulations was 600 nm.

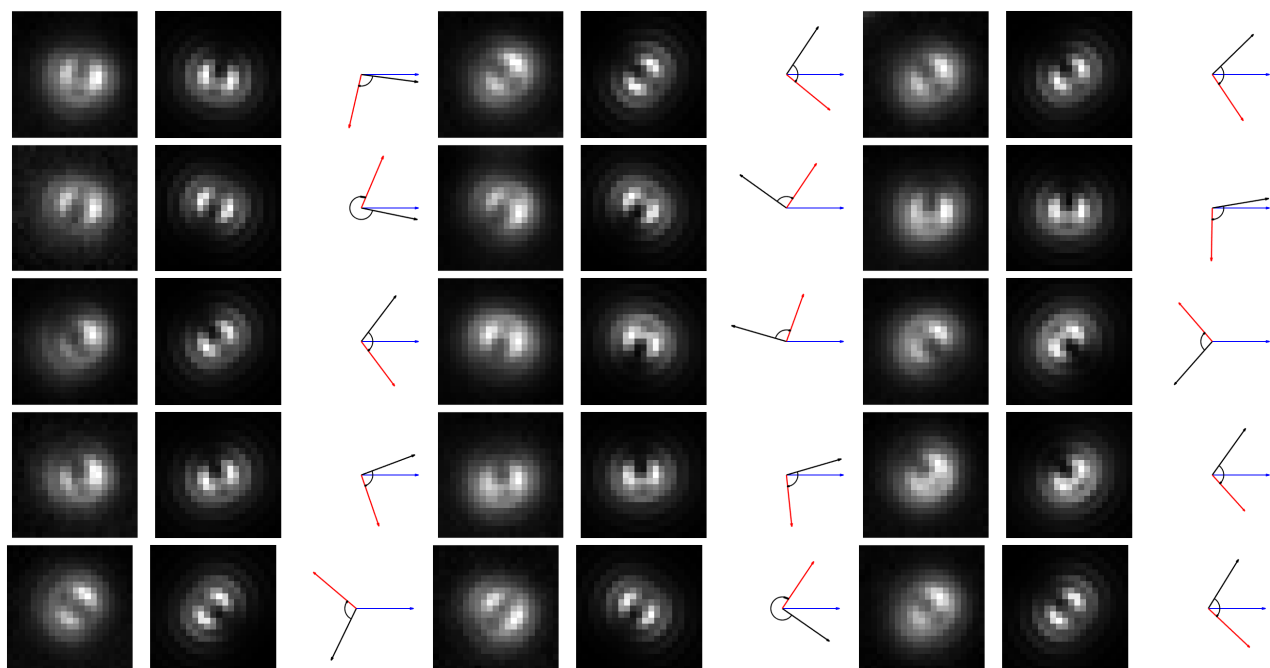

Figure S15: Each set of three sub-figures show the experimental dipole radiation pattern (left), simulated pattern (center) and in-plane orientations (right) in sample **6TT**. X axis, DNA origami, and in-plane dipole orientation are represented by the blue, black and red arrows, respectively. Z axis points towards the image. The in-plane dipole orientation is the projection of half of the double-headed arrow on the plane, and its length is  $\sin(\theta)$ . The black curved arrow represents the angle of the dipole relative to the origami ( $\phi$ ). The lengths of the black and blue arrows are 1. The defocused distance in the simulations was 550 nm.

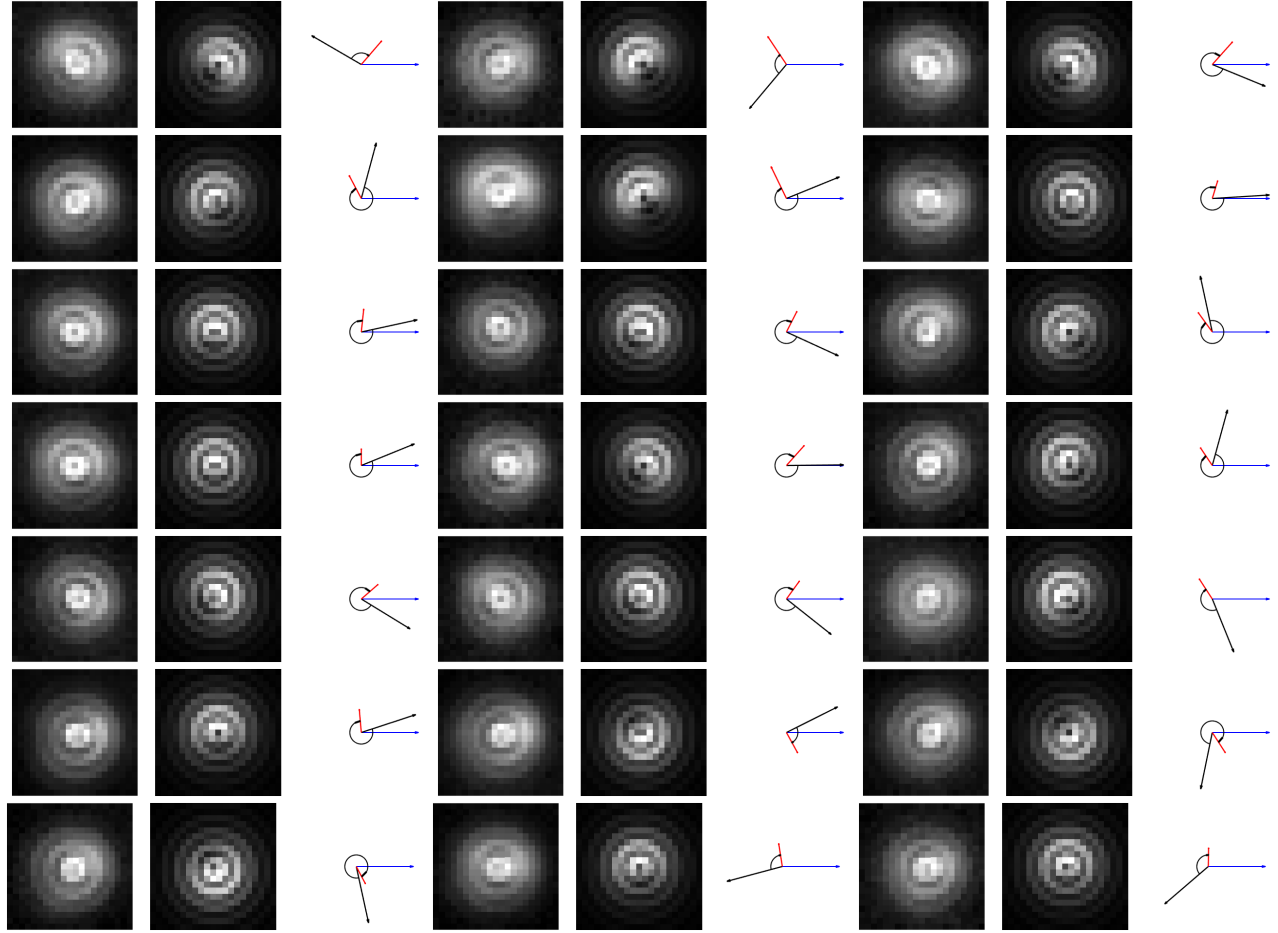

Figure S16: Each set of three sub-figures show the experimental dipole radiation pattern (left), simulated pattern (center) and in-plane orientations (right) in sample **7AA**. X axis, DNA origami, and in-plane dipole orientation are represented by the blue, black and red arrows, respectively. Z axis points towards the image. The in-plane dipole orientation is the projection of half of the double-headed arrow on the plane, and its length is  $\sin(\theta)$ . The black curved arrow represents the angle of the dipole relative to the origami ( $\phi$ ). The lengths of the black and blue arrows are 1. The defocused distance in the simulations was 575 nm.

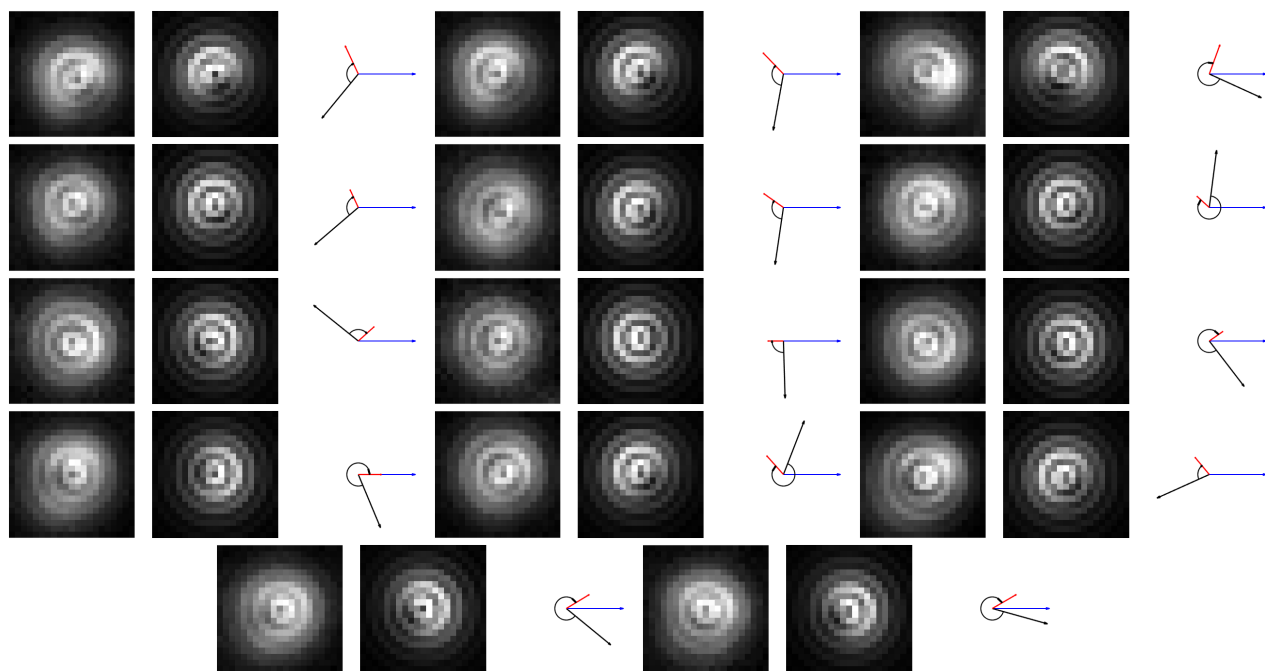

Figure S17: Each set of three sub-figures show the experimental dipole radiation pattern (left), simulated pattern (center) and in-plane orientations (right) in sample **7GC**. X axis, DNA origami, and in-plane dipole orientation are represented by the blue, black and red arrows, respectively. Z axis points towards the image. The in-plane dipole orientation is the projection of half of the double-headed arrow on the plane, and its length is  $\sin(\theta)$ . The black curved arrow represents the angle of the dipole relative to the origami ( $\phi$ ). The lengths of the black and blue arrows are 1. The defocused distance in the simulations was 600 nm.

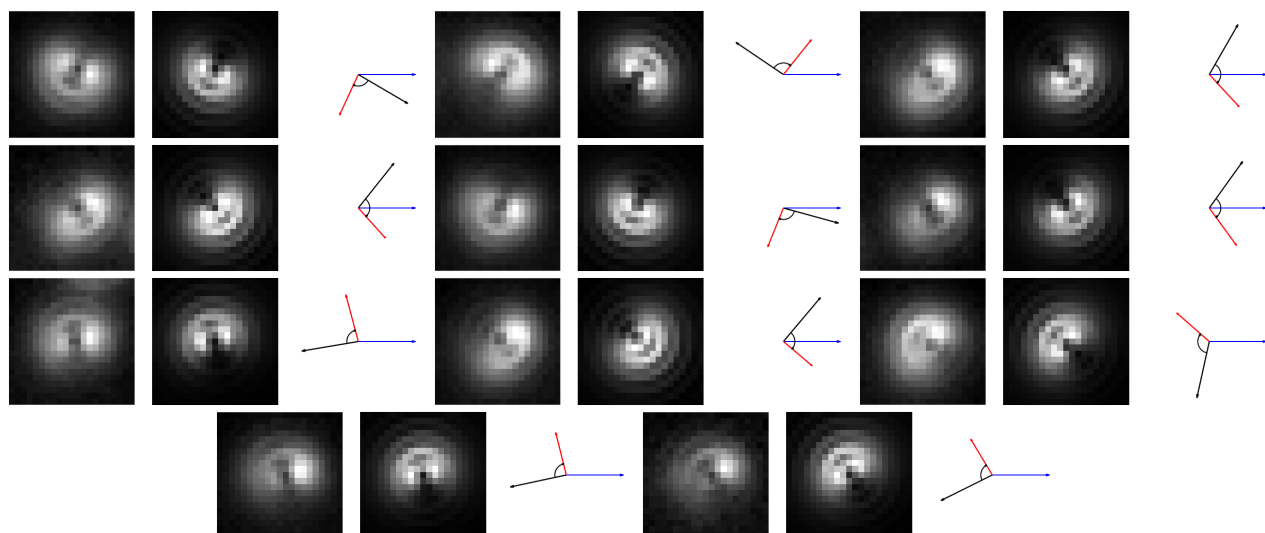

Figure S18: Each set of three sub-figures show the experimental dipole radiation pattern (left), simulated pattern (center) and in-plane orientations (right) in sample **7TT**. X axis, DNA origami, and in-plane dipole orientation are represented by the blue, black and red arrows, respectively. Z axis points towards the image. The in-plane dipole orientation is the projection of half of the double-headed arrow on the plane, and its length is  $\sin(\theta)$ . The black curved arrow represents the angle of the dipole relative to the origami ( $\phi$ ). The lengths of the black and blue arrows are 1. The defocused distance in the simulations was 600 nm.



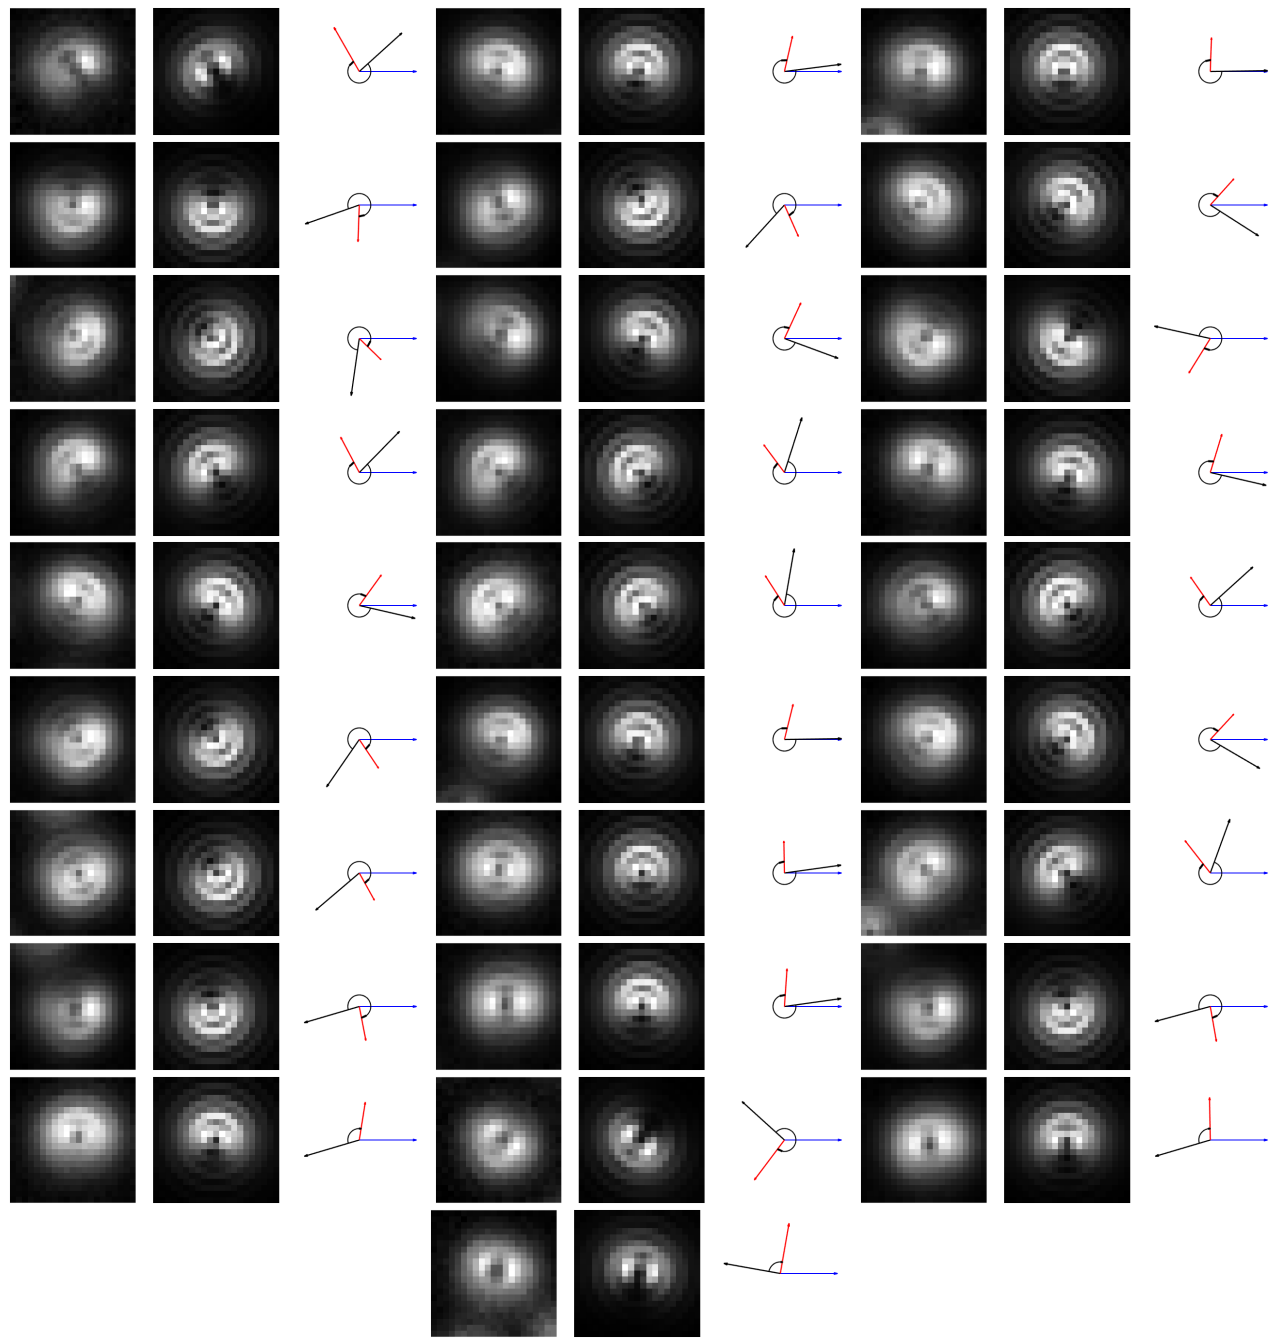

Figure S19: Each set of three sub-figures show the experimental dipole radiation pattern (left), simulated pattern (center) and in-plane orientations (right) in sample **8AA**. X axis, DNA origami, and in-plane dipole orientation are represented by the blue, black and red arrows, respectively. Z axis points towards the image. The in-plane dipole orientation is the projection of half of the double-headed arrow on the plane, and its length is  $\sin(\theta)$ . The black curved arrow represents the angle of the dipole relative to the origami ( $\phi$ ). The lengths of the black and blue arrows are 1. The defocused distance in the simulations was 600 nm.

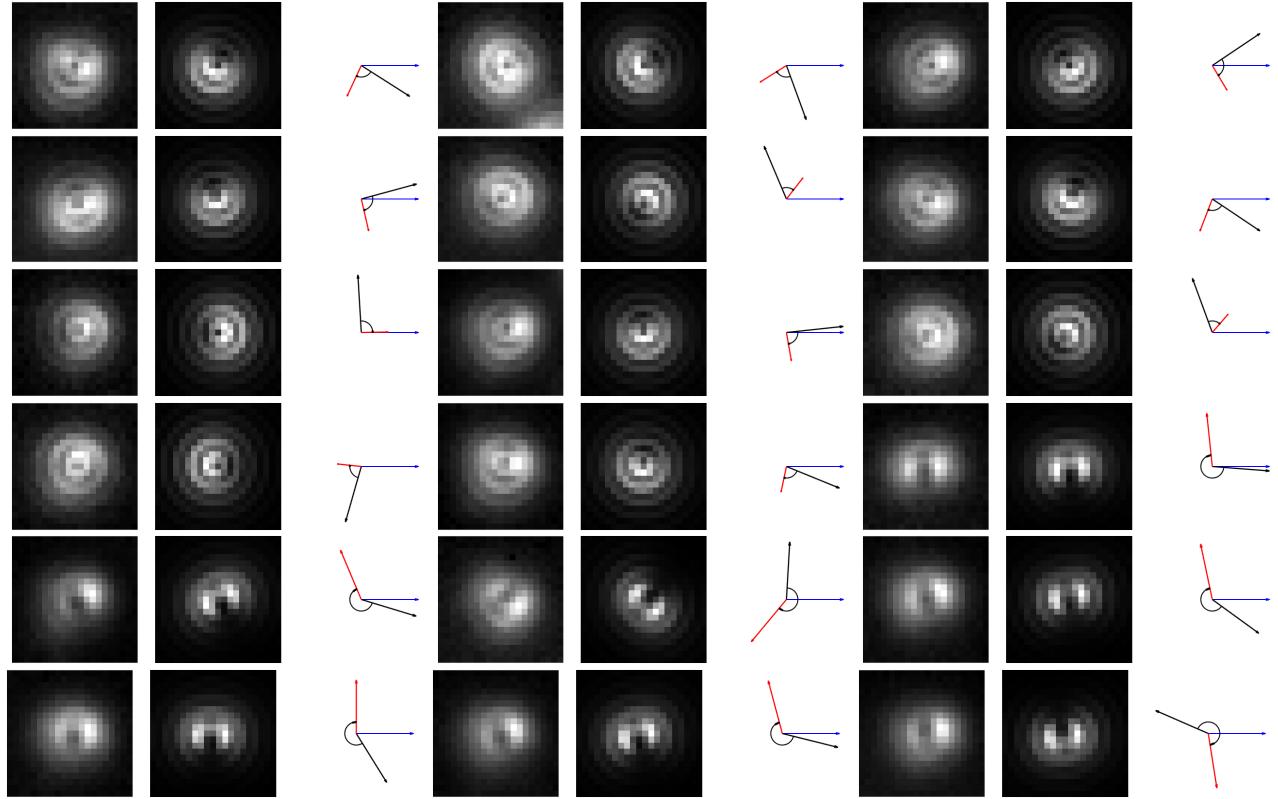

Figure S20: Each set of three sub-figures show the experimental dipole radiation pattern (left), simulated pattern (center) and in-plane orientations (right) in sample **8TT**. X axis, DNA origami, and in-plane dipole orientation are represented by the blue, black and red arrows, respectively. Z axis points towards the image. The in-plane dipole orientation is the projection of half of the double-headed arrow on the plane, and its length is  $\sin(\theta)$ . The black curved arrow represents the angle of the dipole relative to the origami ( $\phi$ ). The lengths of the black and blue arrows are 1. The defocused distance in the simulations was 550 nm.

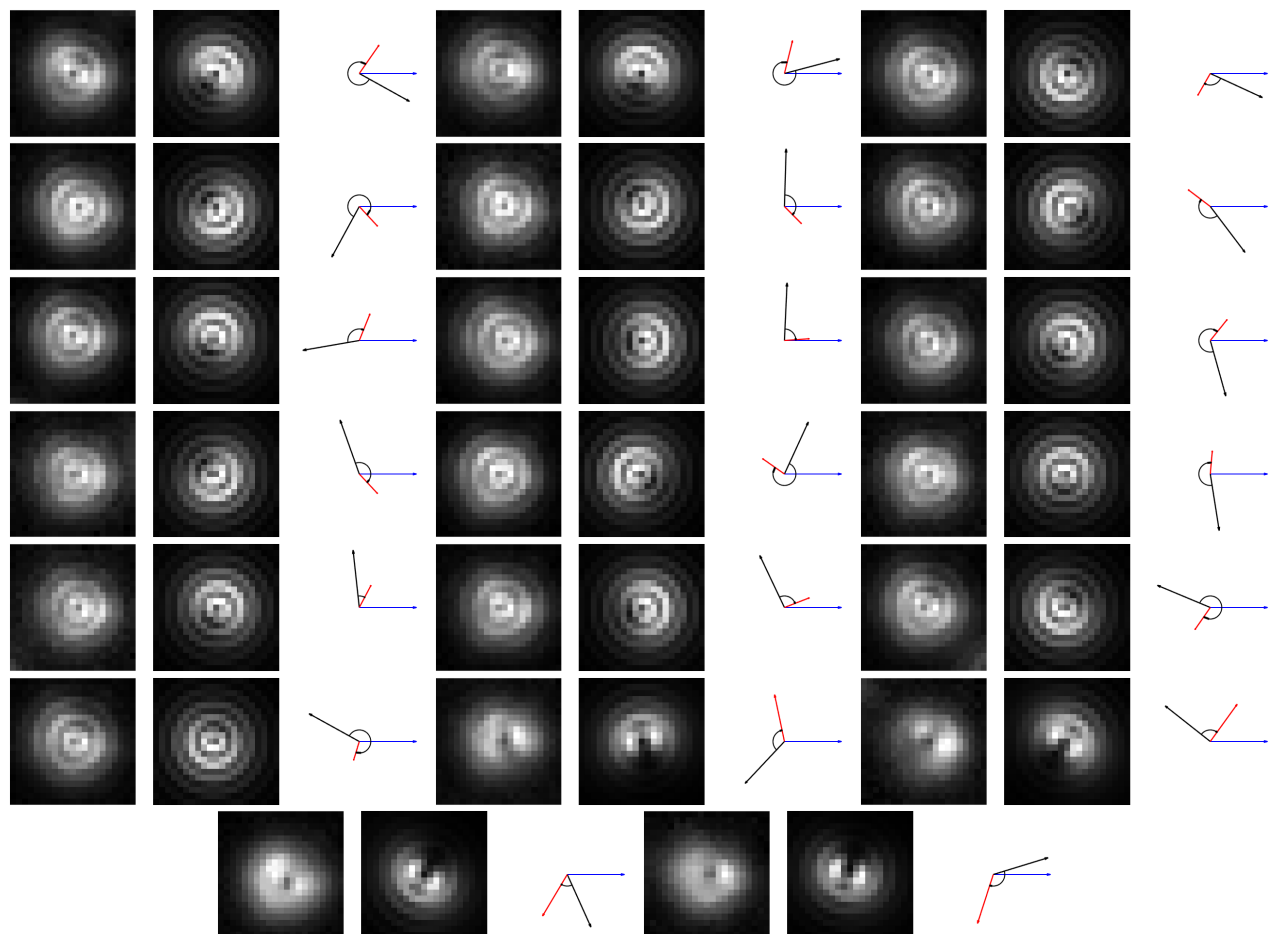

Figure S21: Each set of three sub-figures show the experimental dipole radiation pattern (left), simulated pattern (center) and in-plane orientations (right) in sample **8GC**. X axis, DNA origami, and in-plane dipole orientation are represented by the blue, black and red arrows, respectively. Z axis points towards the image. The in-plane dipole orientation is the projection of half of the double-headed arrow on the plane, and its length is  $\sin(\theta)$ . The black curved arrow represents the angle of the dipole relative to the origami ( $\phi$ ). The lengths of the black and blue arrows are 1. The defocused distance in the simulations was 600 nm.

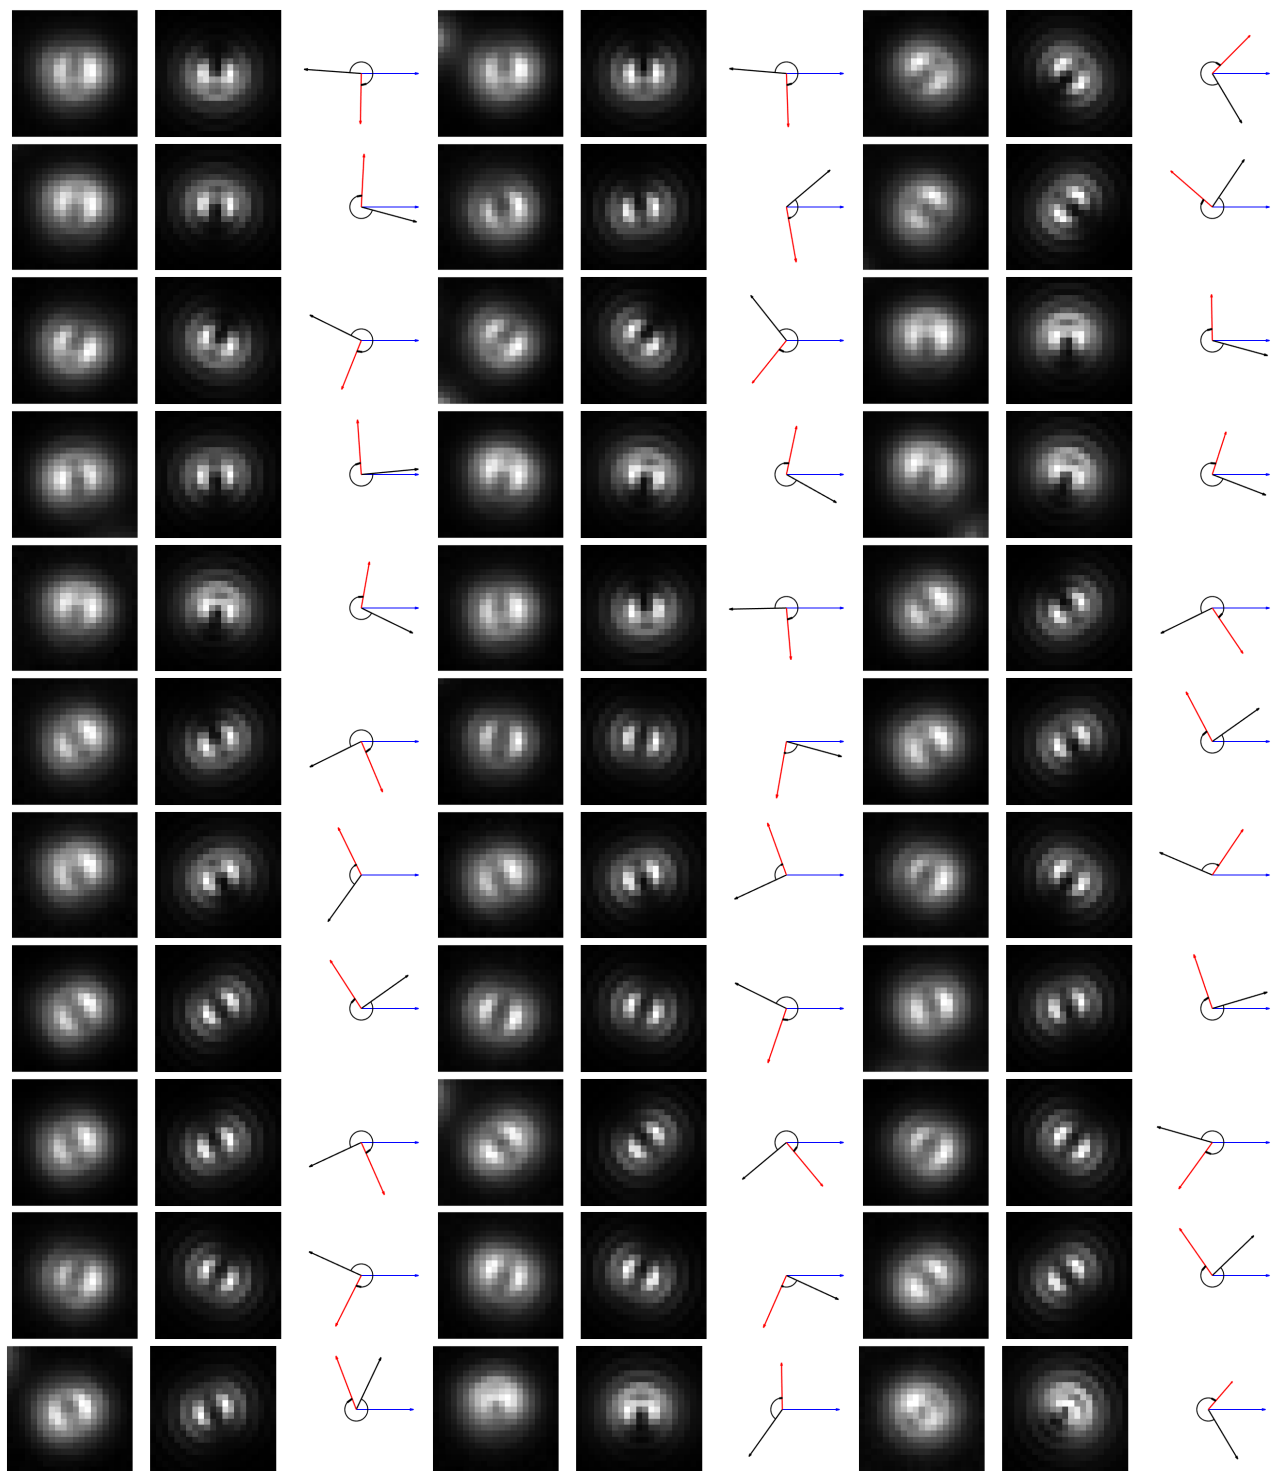

Figure S22: Each set of three sub-figures show the experimental dipole radiation pattern (left), simulated pattern (center) and in-plane orientations (right) in sample **9AA**. X axis, DNA origami, and in-plane dipole orientation are represented by the blue, black and red arrows, respectively. Z axis points towards the image. The in-plane dipole orientation is the projection of half of the double-headed arrow on the plane, and its length is  $\sin(\theta)$ . The black curved arrow represents the angle of the dipole relative to the origami ( $\phi$ ). The lengths of the black and blue arrows are 1. The defocused distance in the simulations was 575 nm.

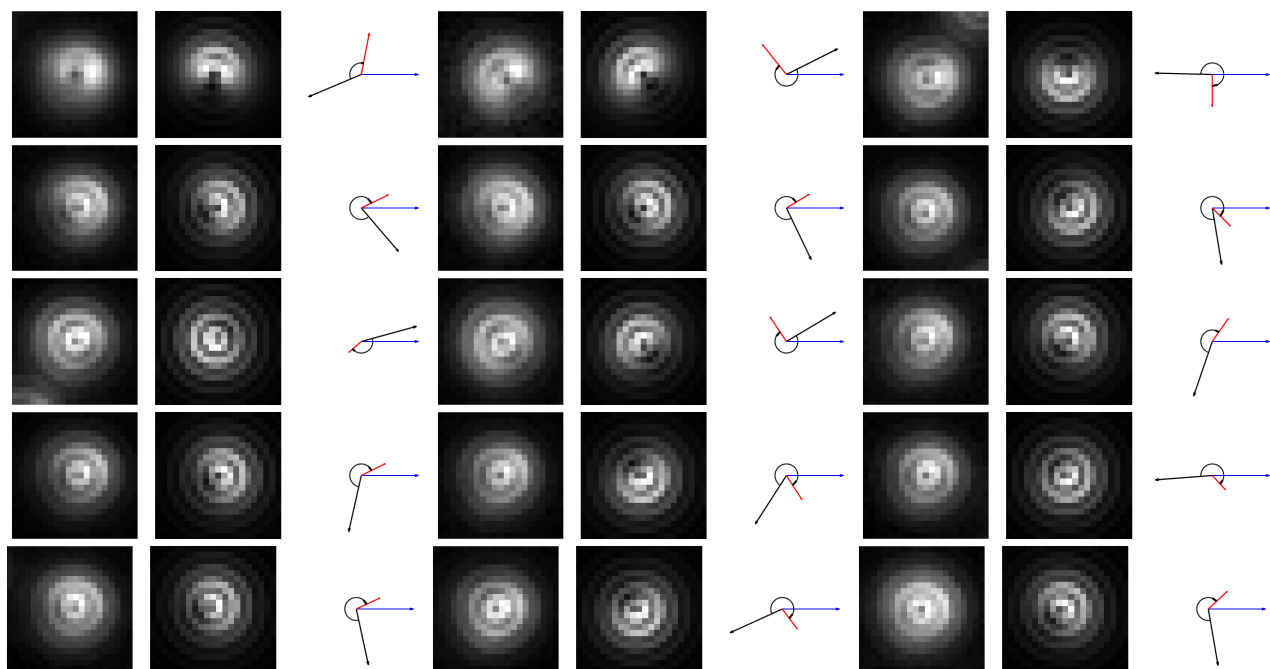

Figure S23: Each set of three sub-figures show the experimental dipole radiation pattern (left), simulated pattern (center) and in-plane orientations (right) in sample **9GC**. X axis, DNA origami, and in-plane dipole orientation are represented by the blue, black and red arrows, respectively. Z axis points towards the image. The in-plane dipole orientation is the projection of half of the double-headed arrow on the plane, and its length is  $\sin(\theta)$ . The black curved arrow represents the angle of the dipole relative to the origami ( $\phi$ ). The lengths of the black and blue arrows are 1. The defocused distance in the simulations was 575 nm.

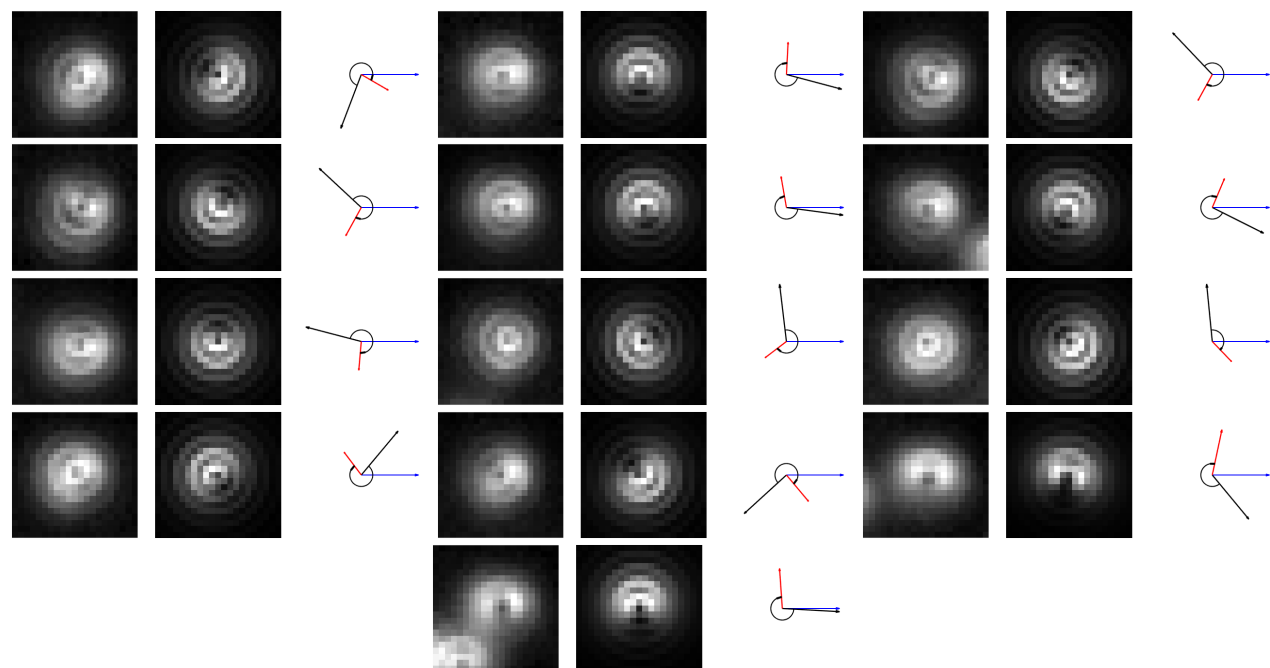

Figure S24: Each set of three sub-figures show the experimental dipole radiation pattern (left), simulated pattern (center) and in-plane orientations (right) in sample **9TT**. X axis, DNA origami, and in-plane dipole orientation are represented by the blue, black and red arrows, respectively. Z axis points towards the image. The in-plane dipole orientation is the projection of half of the double-headed arrow on the plane, and its length is  $\sin(\theta)$ . The black curved arrow represents the angle of the dipole relative to the origami ( $\phi$ ). The lengths of the black and blue arrows are 1. The defocused distance in the simulations was 575 nm.

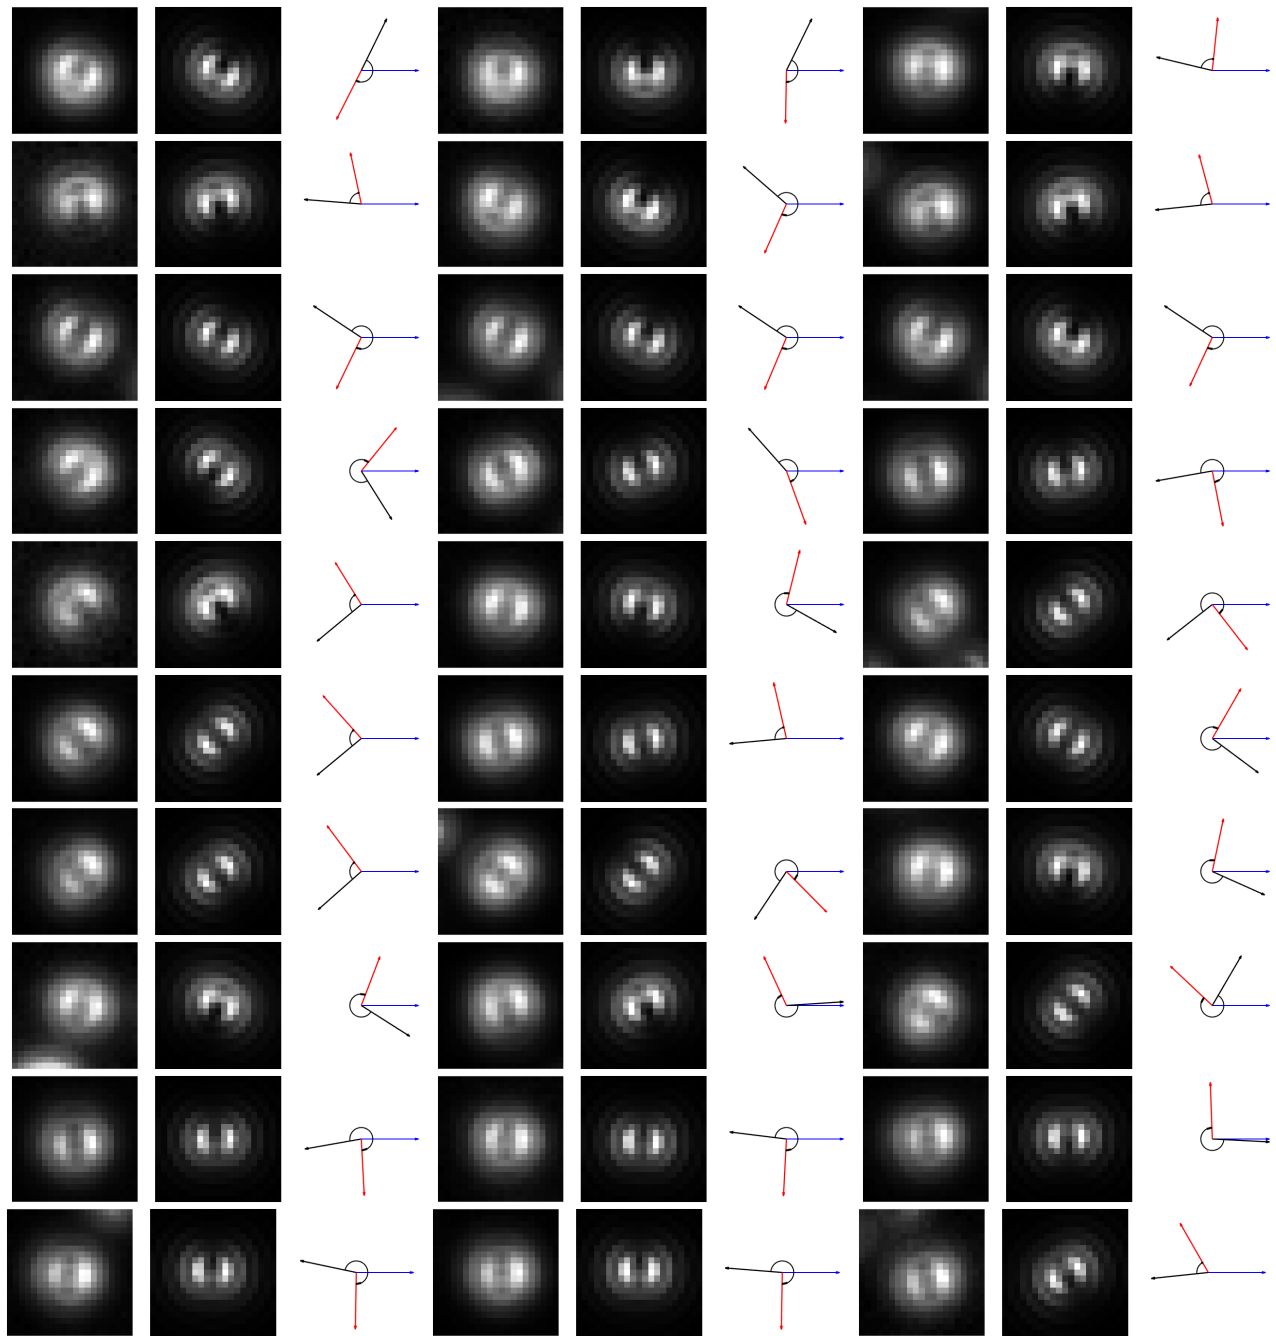

Figure S25: Each set of three sub-figures show the experimental dipole radiation pattern (left), simulated pattern (center) and in-plane orientations (right) in sample **10AA**. X axis, DNA origami, and in-plane dipole orientation are represented by the blue, black and red arrows, respectively. Z axis points towards the image. The in-plane dipole orientation is the projection of half of the double-headed arrow on the plane, and its length is  $\sin(\theta)$ . The black curved arrow represents the angle of the dipole relative to the origami ( $\phi$ ). The lengths of the black and blue arrows are 1. The defocused distance in the simulations was 550 nm.

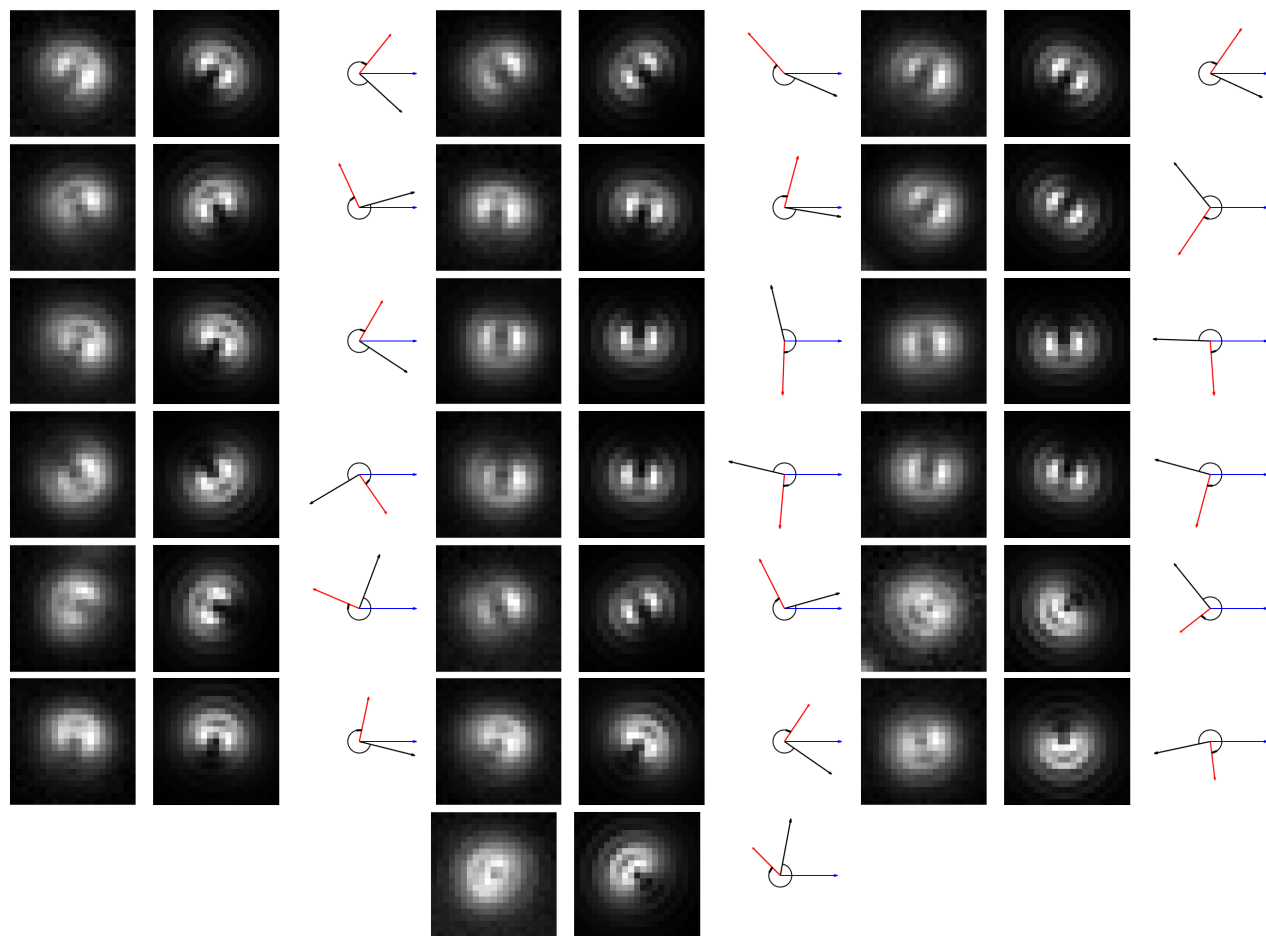

Figure S26: Each set of three sub-figures show the experimental dipole radiation pattern (left), simulated pattern (center) and in-plane orientations (right) in sample **10GC**. X axis, DNA origami, and in-plane dipole orientation are represented by the blue, black and red arrows, respectively. Z axis points towards the image. The in-plane dipole orientation is the projection of half of the double-headed arrow on the plane, and its length is  $\sin(\theta)$ . The black curved arrow represents the angle of the dipole relative to the origami ( $\phi$ ). The lengths of the black and blue arrows are 1. The defocused distance in the simulations was 575 nm.

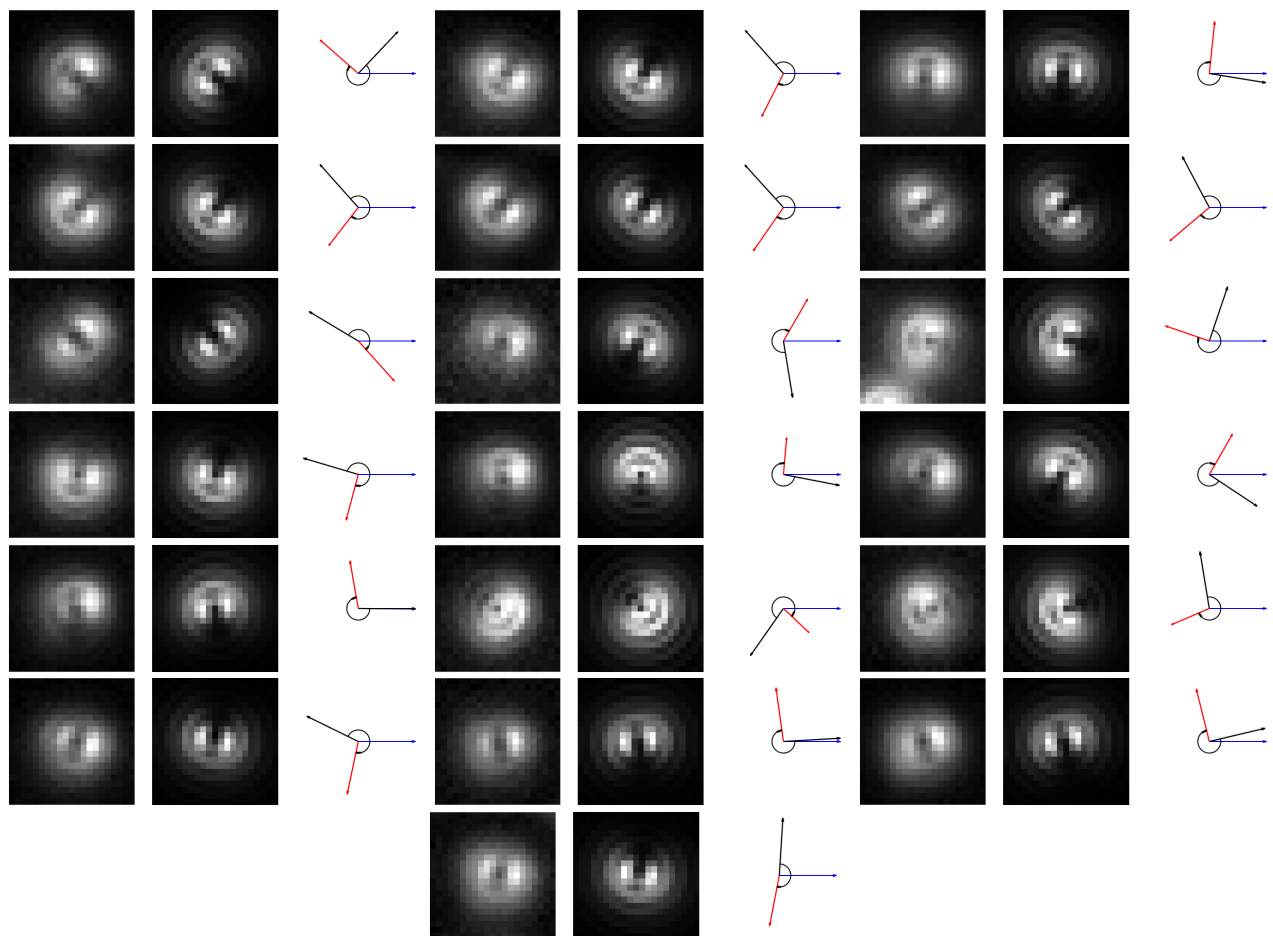

Figure S27: Each set of three sub-figures show the experimental dipole radiation pattern (left), simulated pattern (center) and in-plane orientations (right) in sample **10TT**. X axis, DNA origami, and in-plane dipole orientation are represented by the blue, black and red arrows, respectively. Z axis points towards the image. The in-plane dipole orientation is the projection of half of the double-headed arrow on the plane, and its length is  $\sin(\theta)$ . The black curved arrow represents the angle of the dipole relative to the origami ( $\phi$ ). The lengths of the black and blue arrows are 1. The defocused distance in the simulations was 600 nm.



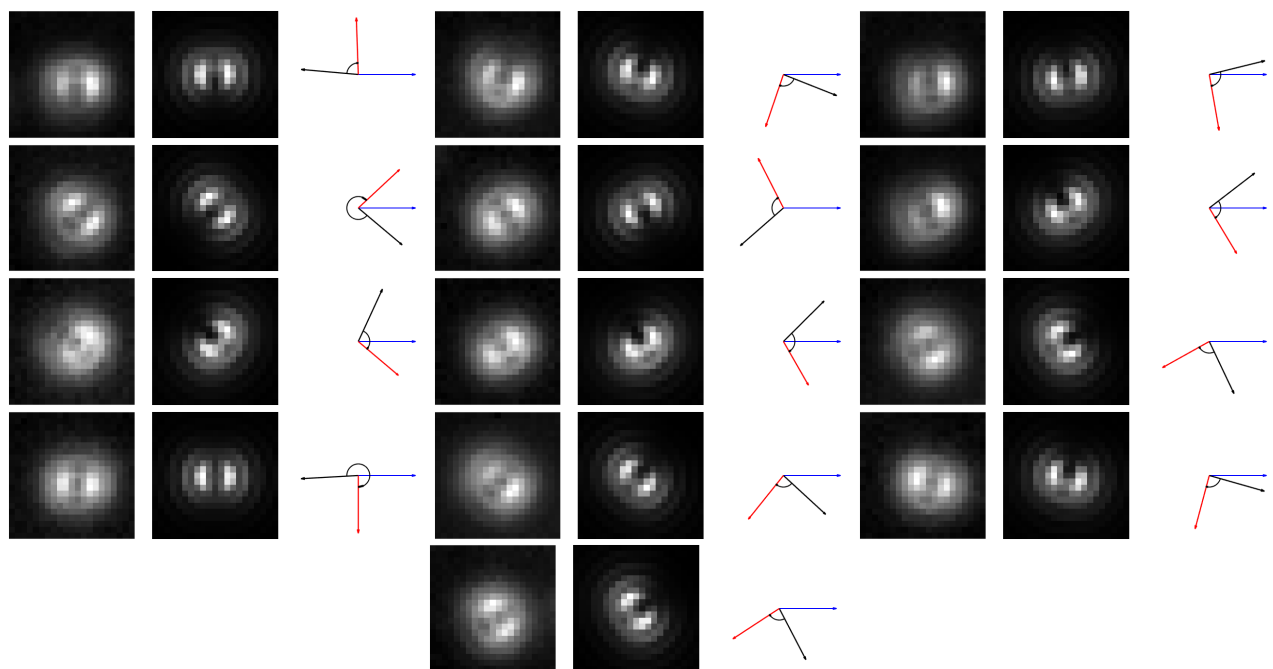

Figure S28: Each set of three sub-figures show the experimental dipole radiation pattern (left), simulated pattern (center) and in-plane orientations (right) in sample **6GC/1A**. X axis, DNA origami, and in-plane dipole orientation are represented by the blue, black and red arrows, respectively. Z axis points towards the image. The in-plane dipole orientation is the projection of half of the double-headed arrow on the plane, and its length is  $\sin(\theta)$ . The black curved arrow represents the angle of the dipole relative to the origami ( $\phi$ ). The lengths of the black and blue arrows are 1. The defocused distance in the simulations was 550 nm.

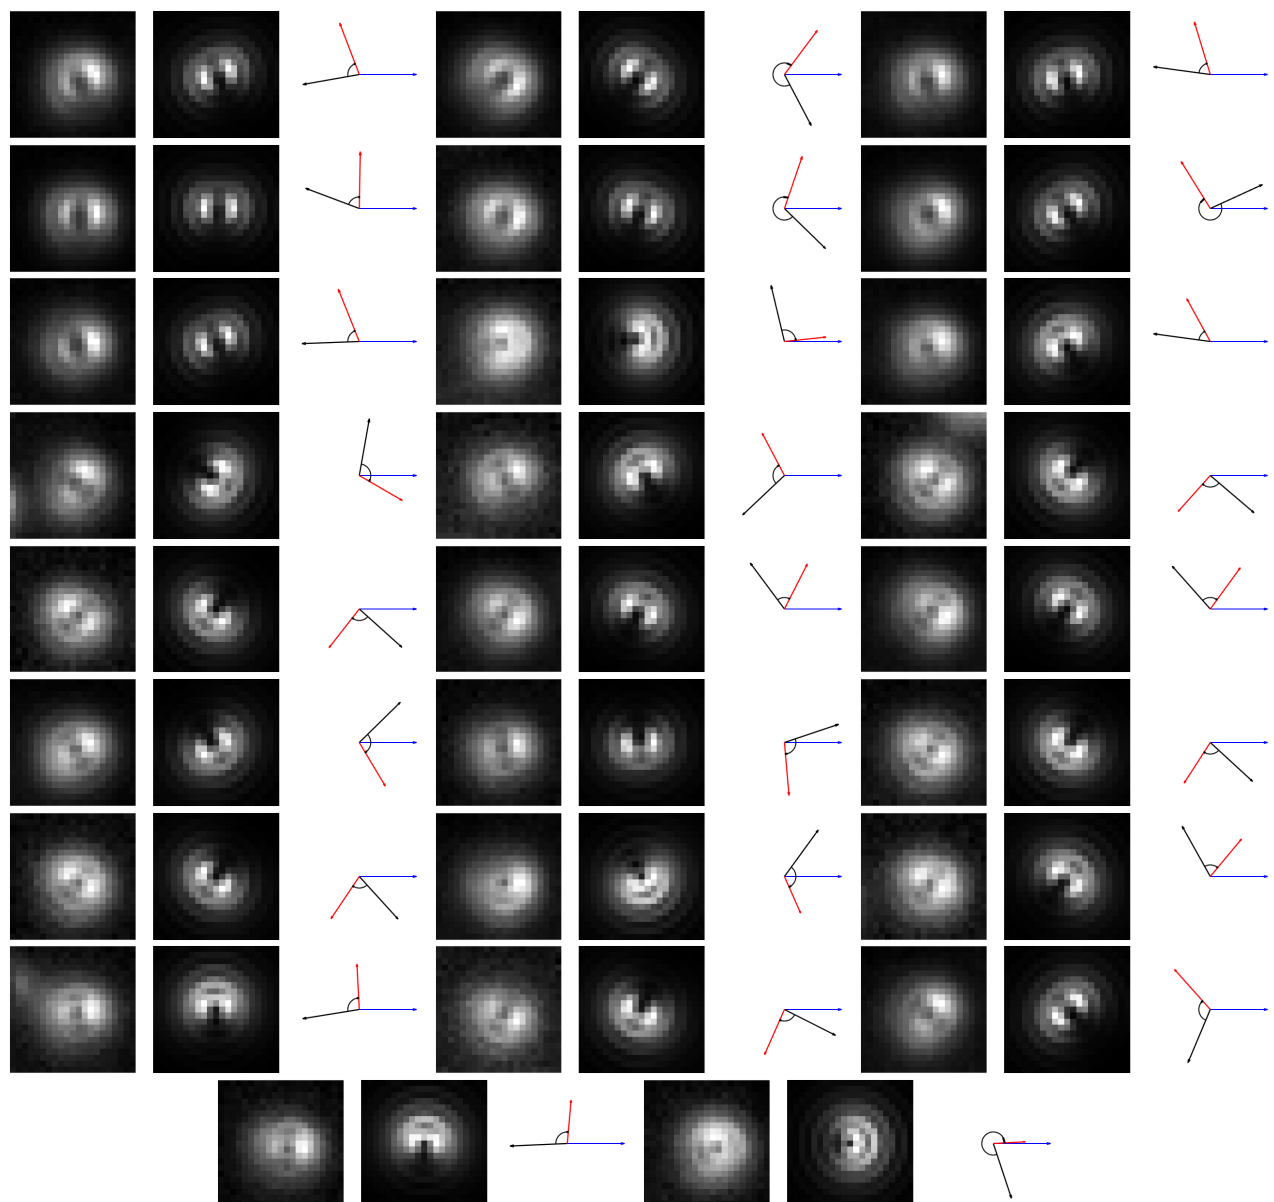

Figure S29: Each set of three sub-figures show the experimental dipole radiation pattern (left), simulated pattern (center) and in-plane orientations (right) in sample **6GC/2A**. X axis, DNA origami, and in-plane dipole orientation are represented by the blue, black and red arrows, respectively. Z axis points towards the image. The in-plane dipole orientation is the projection of half of the double-headed arrow on the plane, and its length is  $\sin(\theta)$ . The black curved arrow represents the angle of the dipole relative to the origami ( $\phi$ ). The lengths of the black and blue arrows are 1. The defocused distance in the simulations was 575 nm.

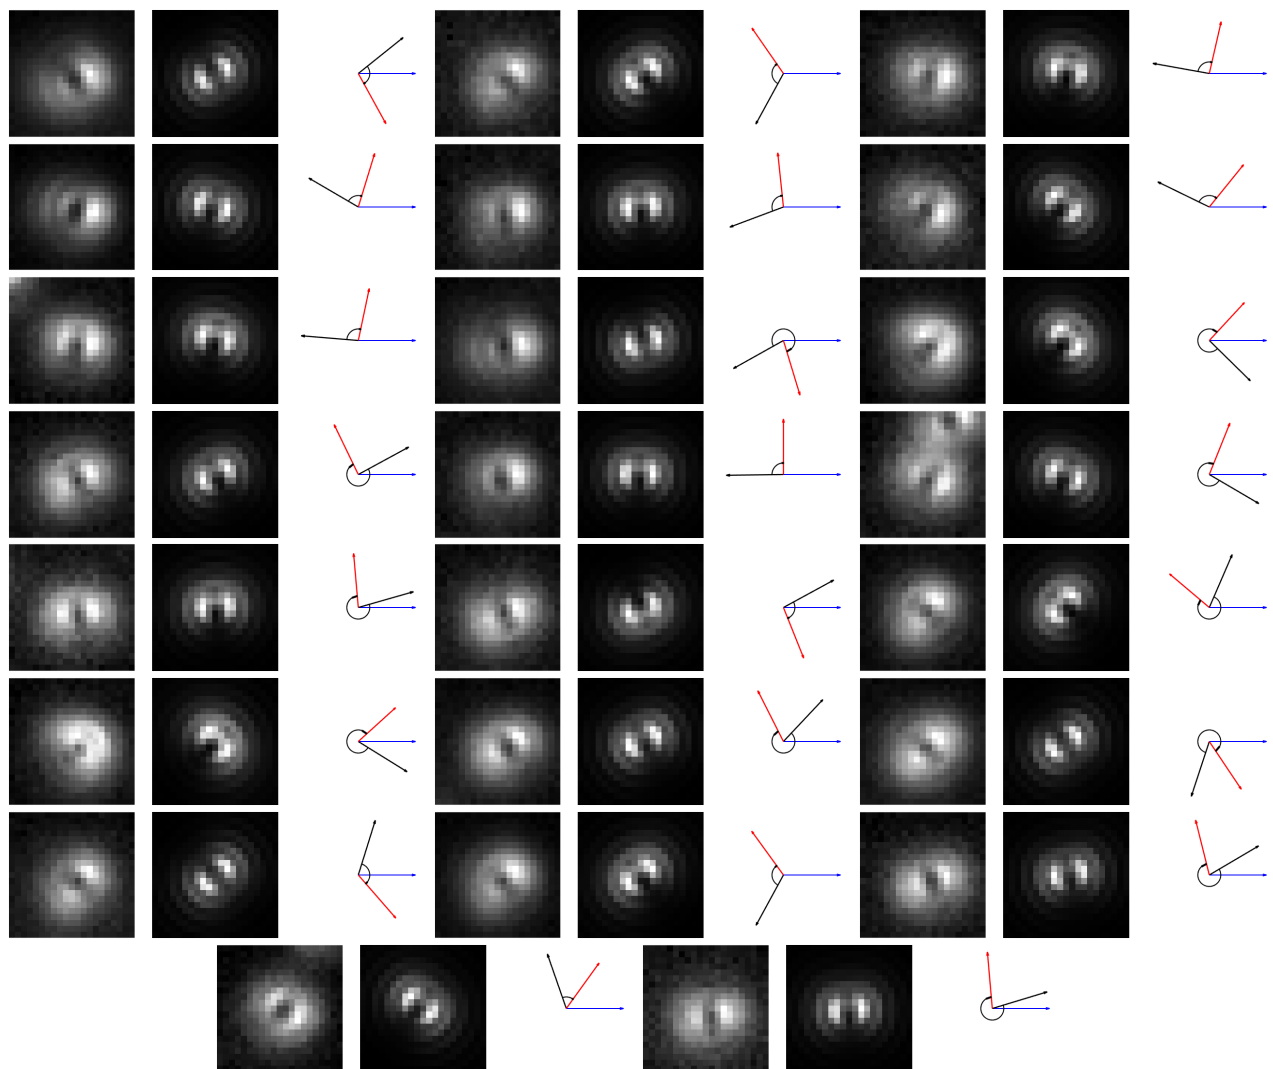

Figure S30: Each set of three sub-figures show the experimental dipole radiation pattern (left), simulated pattern (center) and in-plane orientations (right) in sample **6GC/3A**. X axis, DNA origami, and in-plane dipole orientation are represented by the blue, black and red arrows, respectively. Z axis points towards the image. The in-plane dipole orientation is the projection of half of the double-headed arrow on the plane, and its length is  $\sin(\theta)$ . The black curved arrow represents the angle of the dipole relative to the origami ( $\phi$ ). The lengths of the black and blue arrows are 1. The defocused distance in the simulations was 550 nm.

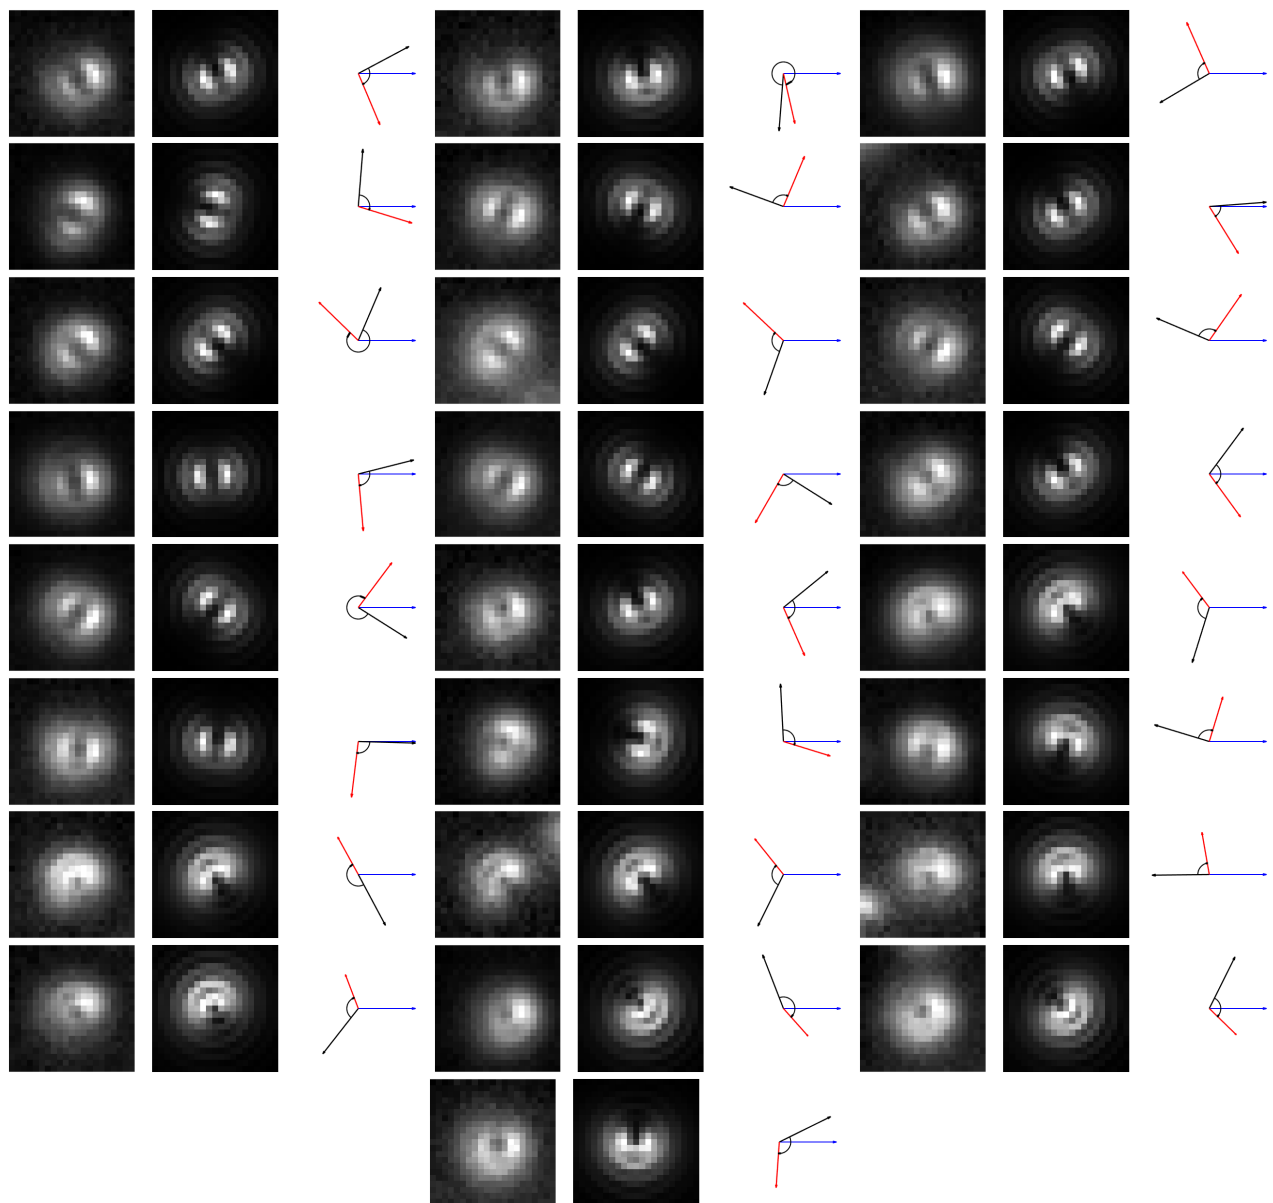

Figure S31: Each set of three sub-figures show the experimental dipole radiation pattern (left), simulated pattern (center) and in-plane orientations (right) in sample **6GC/4A**. X axis, DNA origami, and in-plane dipole orientation are represented by the blue, black and red arrows, respectively. Z axis points towards the image. The in-plane dipole orientation is the projection of half of the double-headed arrow on the plane, and its length is  $\sin(\theta)$ . The black curved arrow represents the angle of the dipole relative to the origami ( $\phi$ ). The lengths of the black and blue arrows are 1. The defocused distance in the simulations was 575 nm.

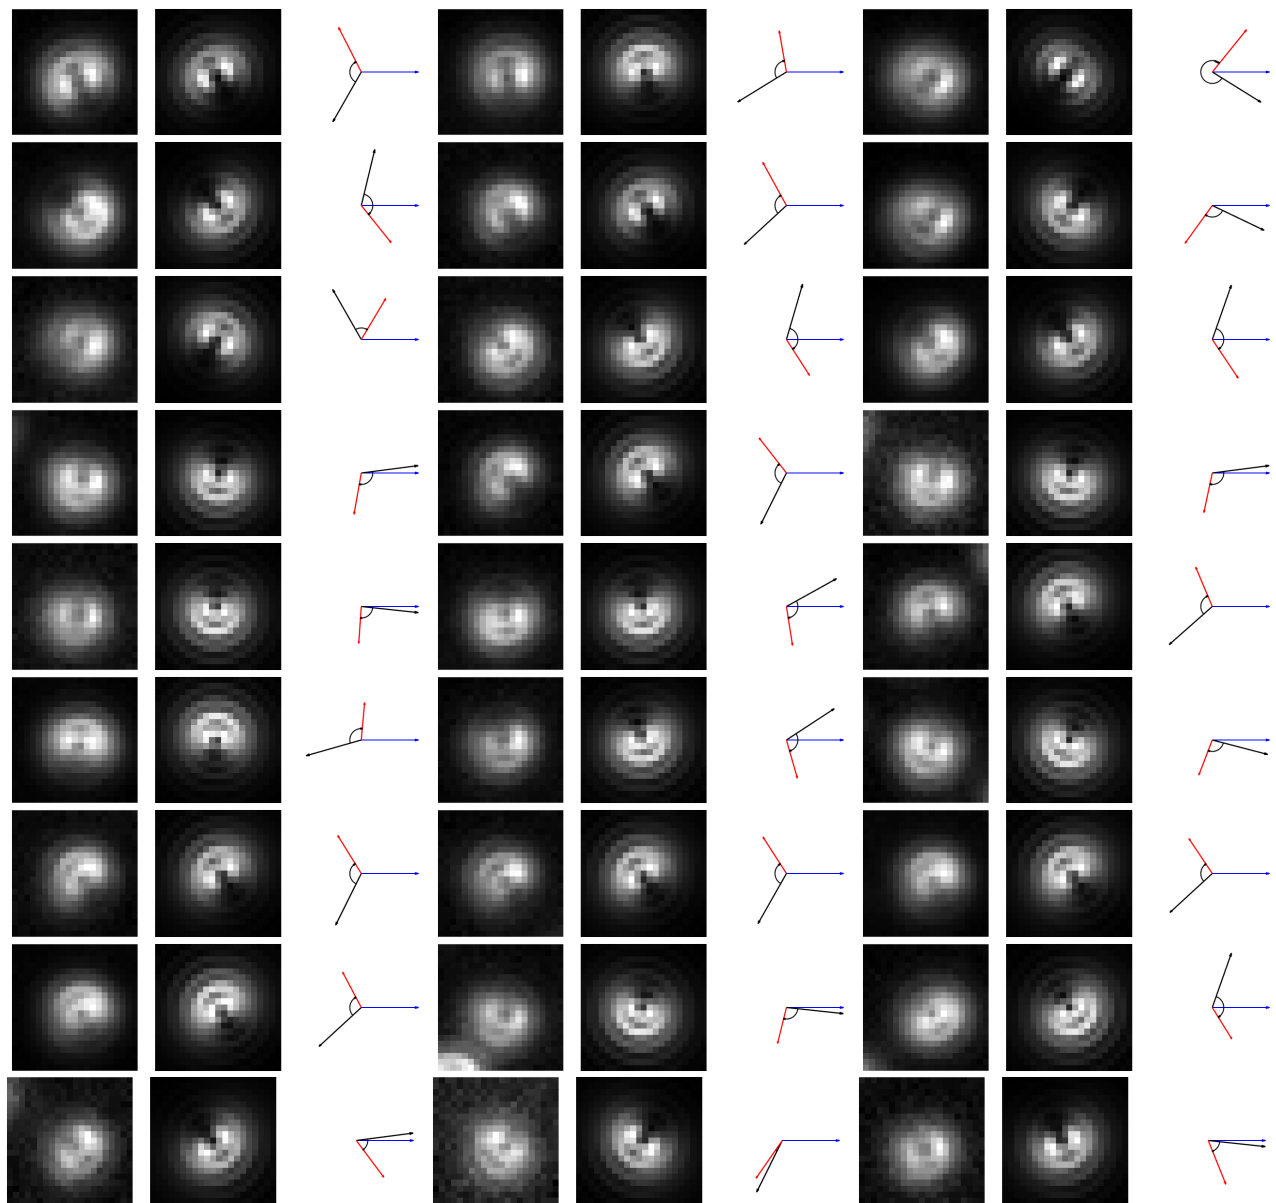

Figure S32: Each set of three sub-figures show the experimental dipole radiation pattern (left), simulated pattern (center) and in-plane orientations (right) in sample **6GC/5A**. X axis, DNA origami, and in-plane dipole orientation are represented by the blue, black and red arrows, respectively. Z axis points towards the image. The in-plane dipole orientation is the projection of half of the double-headed arrow on the plane, and its length is  $\sin(\theta)$ . The black curved arrow represents the angle of the dipole relative to the origami ( $\phi$ ). The lengths of the black and blue arrows are 1. The defocused distance in the simulations was 600 nm.

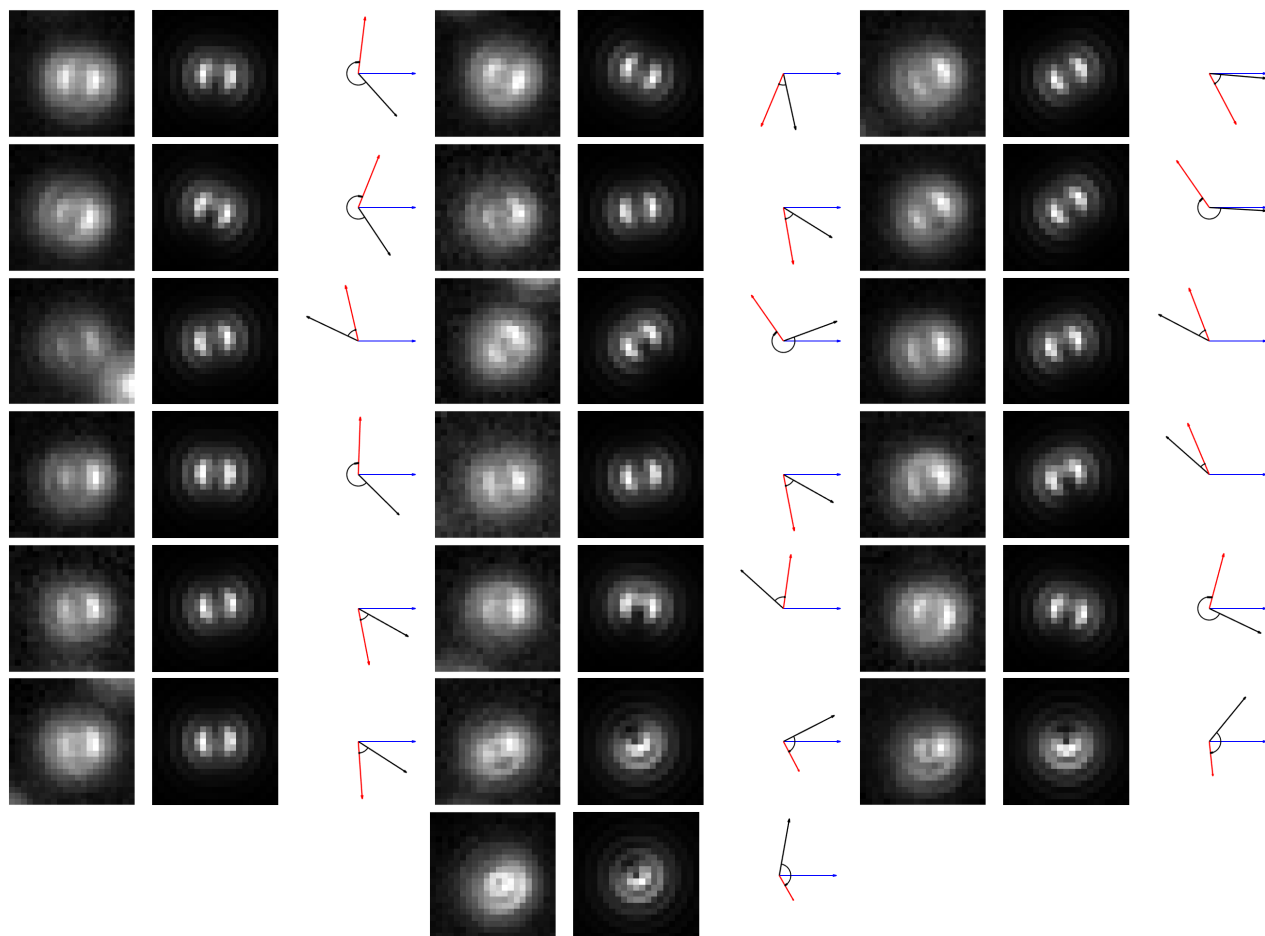

Figure S33: Each set of three sub-figures show the experimental dipole radiation pattern (left), simulated pattern (center) and in-plane orientations (right) in sample **6GC/6A**. X axis, DNA origami, and in-plane dipole orientation are represented by the blue, black and red arrows, respectively. Z axis points towards the image. The in-plane dipole orientation is the projection of half of the double-headed arrow on the plane, and its length is  $\sin(\theta)$ . The black curved arrow represents the angle of the dipole relative to the origami ( $\phi$ ). The lengths of the black and blue arrows are 1. The defocused distance in the simulations was 525 nm.

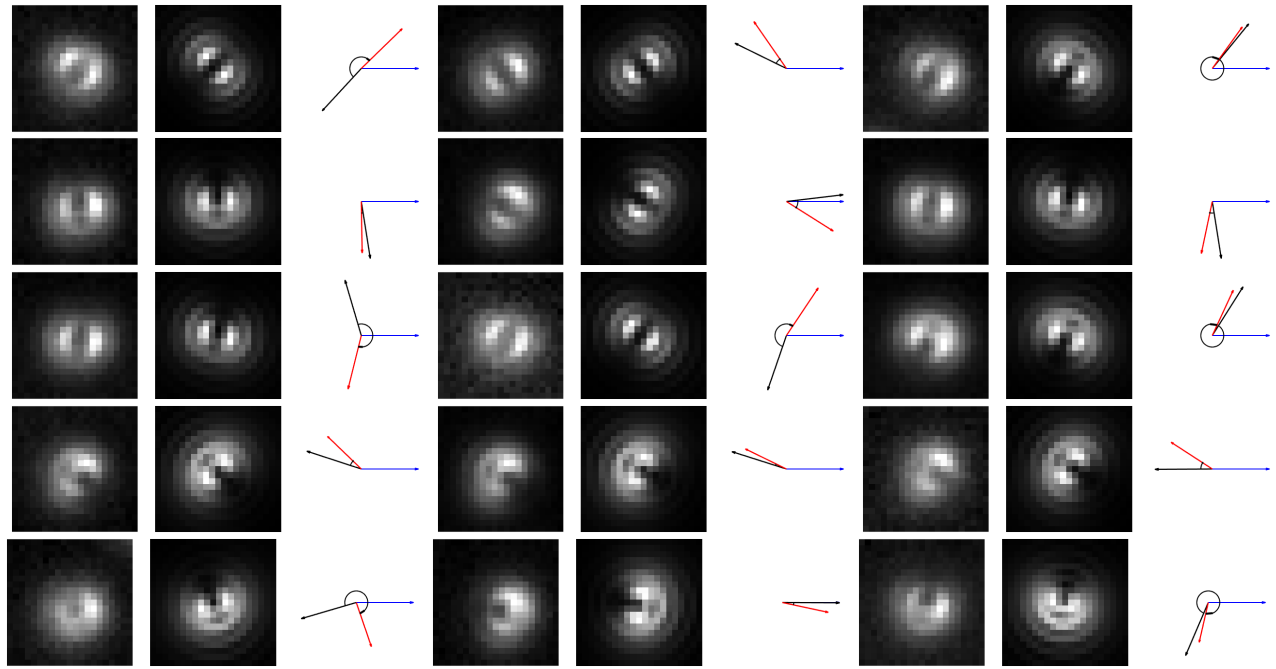

Figure S34: Each set of three sub-figures show the experimental dipole radiation pattern (left), simulated pattern (center) and in-plane orientations (right) in sample **6GC/7A**. X axis, DNA origami, and in-plane dipole orientation are represented by the blue, black and red arrows, respectively. Z axis points towards the image. The in-plane dipole orientation is the projection of half of the double-headed arrow on the plane, and its length is  $\sin(\theta)$ . The black curved arrow represents the angle of the dipole relative to the origami ( $\phi$ ). The lengths of the black and blue arrows are 1. The defocused distance in the simulations was 600 nm.

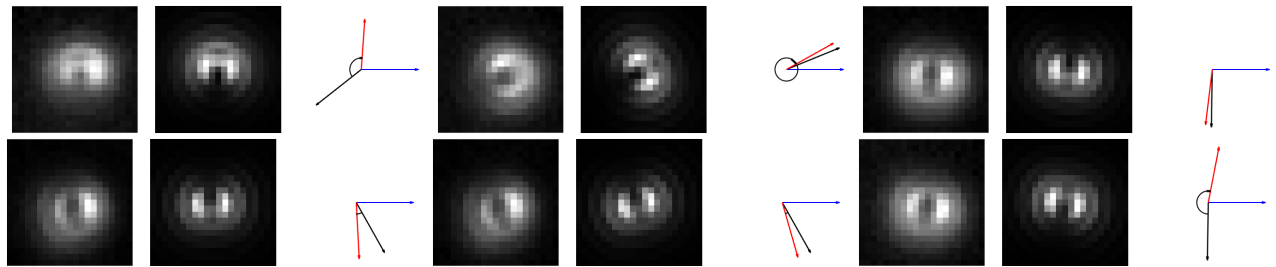

Figure S35: Each set of three sub-figures show the experimental dipole radiation pattern (left), simulated pattern (center) and in-plane orientations (right) in sample **6GC/8A**. X axis, DNA origami, and in-plane dipole orientation are represented by the blue, black and red arrows, respectively. Z axis points towards the image. The in-plane dipole orientation is the projection of half of the double-headed arrow on the plane, and its length is  $\sin(\theta)$ . The black curved arrow represents the angle of the dipole relative to the origami ( $\phi$ ). The lengths of the black and blue arrows are 1. The defocused distance in the simulations was 550 nm.

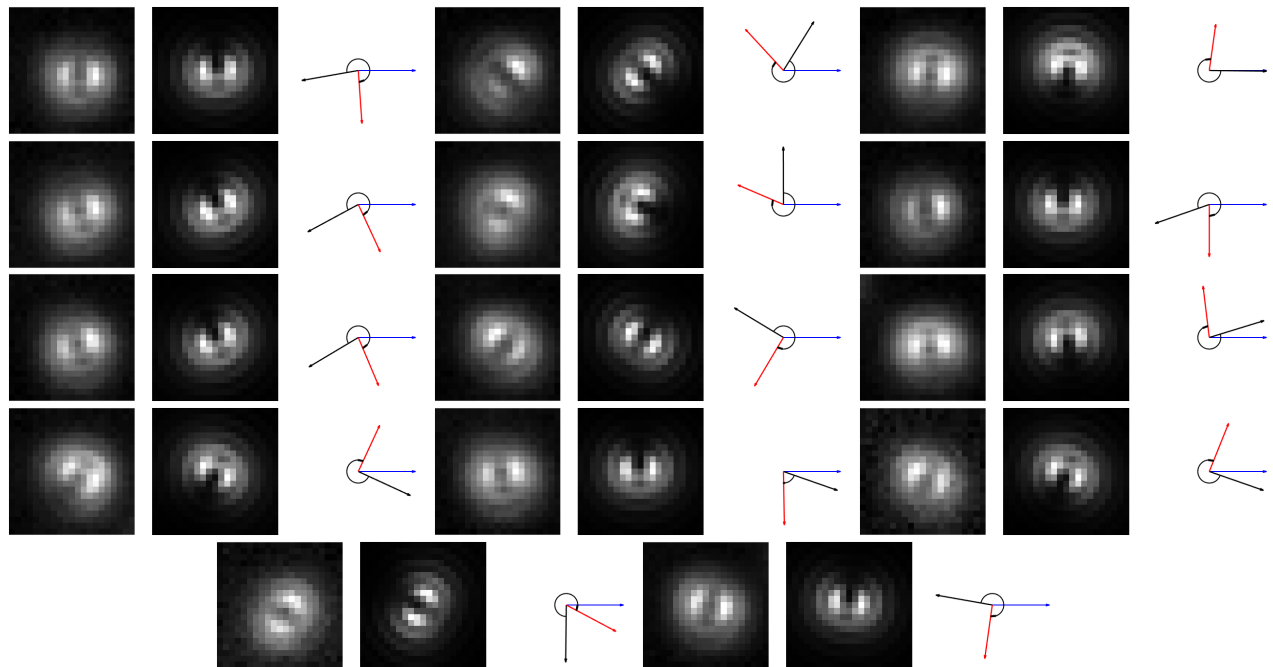

Figure S36: Each set of three sub-figures show the experimental dipole radiation pattern (left), simulated pattern (center) and in-plane orientations (right) in sample **-5GC**. X axis, DNA origami, and in-plane dipole orientation are represented by the blue, black and red arrows, respectively. Z axis points towards the image. The in-plane dipole orientation is the projection of half of the double-headed arrow on the plane, and its length is  $\sin(\theta)$ . The black curved arrow represents the angle of the dipole relative to the origami ( $\phi$ ). The lengths of the black and blue arrows are 1. The defocused distance in the simulations was 575 nm.

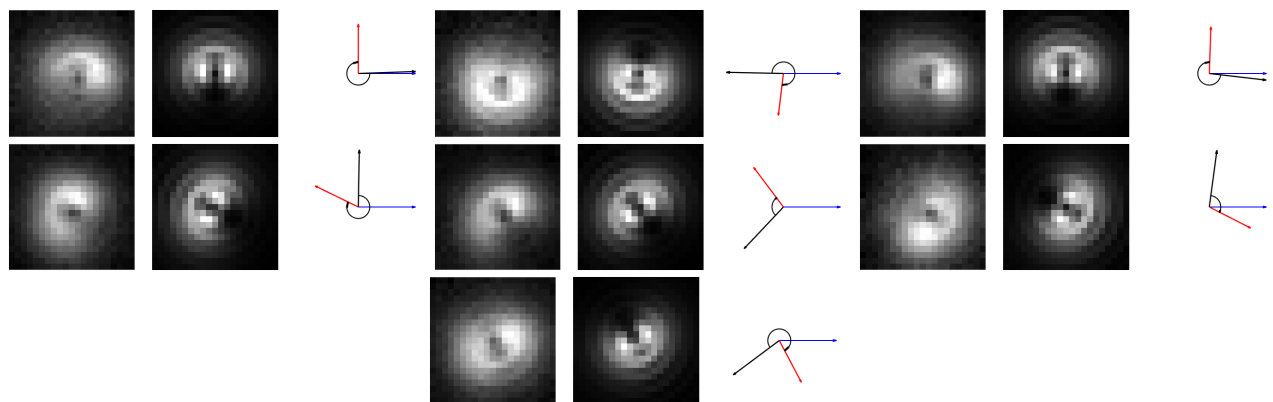

Figure S37: Each set of three sub-figures show the experimental dipole radiation pattern (left), simulated pattern (center) and in-plane orientations (right) in sample **-6GC**. X axis, DNA origami, and in-plane dipole orientation are represented by the blue, black and red arrows, respectively. Z axis points towards the image. The in-plane dipole orientation is the projection of half of the double-headed arrow on the plane, and its length is  $\sin(\theta)$ . The black curved arrow represents the angle of the dipole relative to the origami ( $\phi$ ). The lengths of the black and blue arrows are 1. The defocused distance in the simulations was 650 nm.



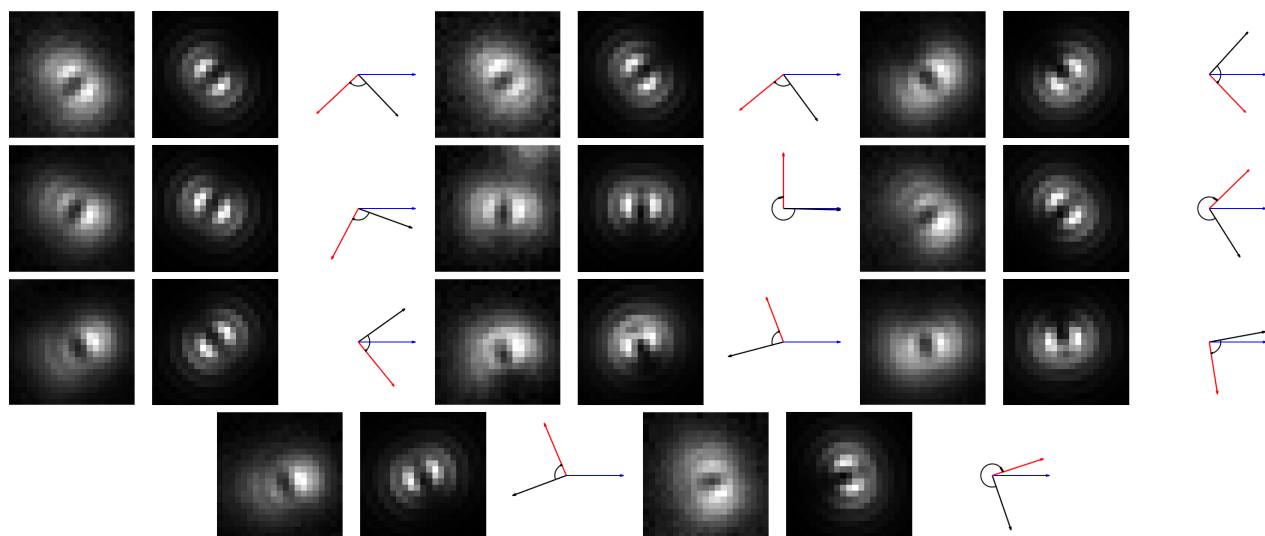

Figure S38: Each set of three sub-figures show the experimental dipole radiation pattern (left), simulated pattern (center) and in-plane orientations (right) in sample **-7GC**. X axis, DNA origami, and in-plane dipole orientation are represented by the blue, black and red arrows, respectively. Z axis points towards the image. The in-plane dipole orientation is the projection of half of the double-headed arrow on the plane, and its length is  $\sin(\theta)$ . The black curved arrow represents the angle of the dipole relative to the origami ( $\phi$ ). The lengths of the black and blue arrows are 1. The defocused distance in the simulations was 575 nm.

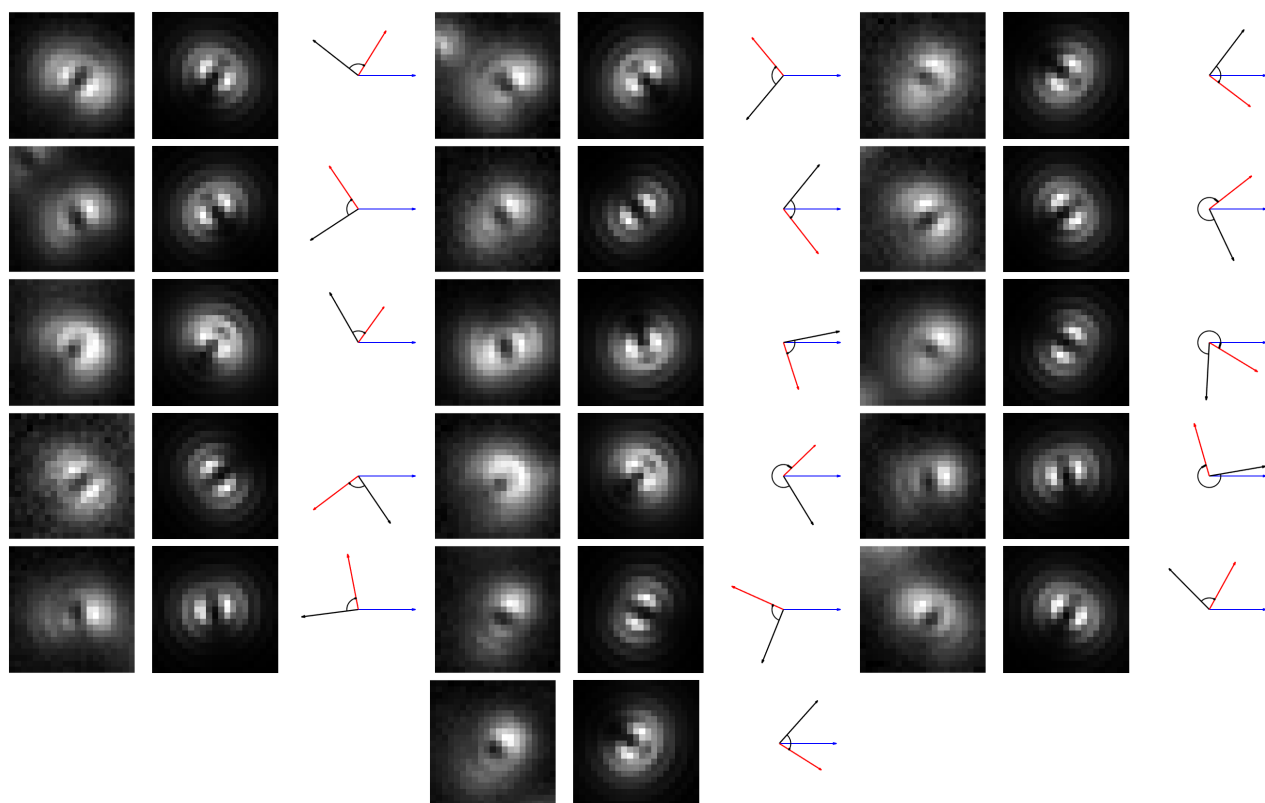

Figure S39: Each set of three sub-figures show the experimental dipole radiation pattern (left), simulated pattern (center) and in-plane orientations (right) in sample **-8GC**. X axis, DNA origami, and in-plane dipole orientation are represented by the blue, black and red arrows, respectively. Z axis points towards the image. The in-plane dipole orientation is the projection of half of the double-headed arrow on the plane, and its length is  $\sin(\theta)$ . The black curved arrow represents the angle of the dipole relative to the origami ( $\phi$ ). The lengths of the black and blue arrows are 1. The defocused distance in the simulations was 600 nm.

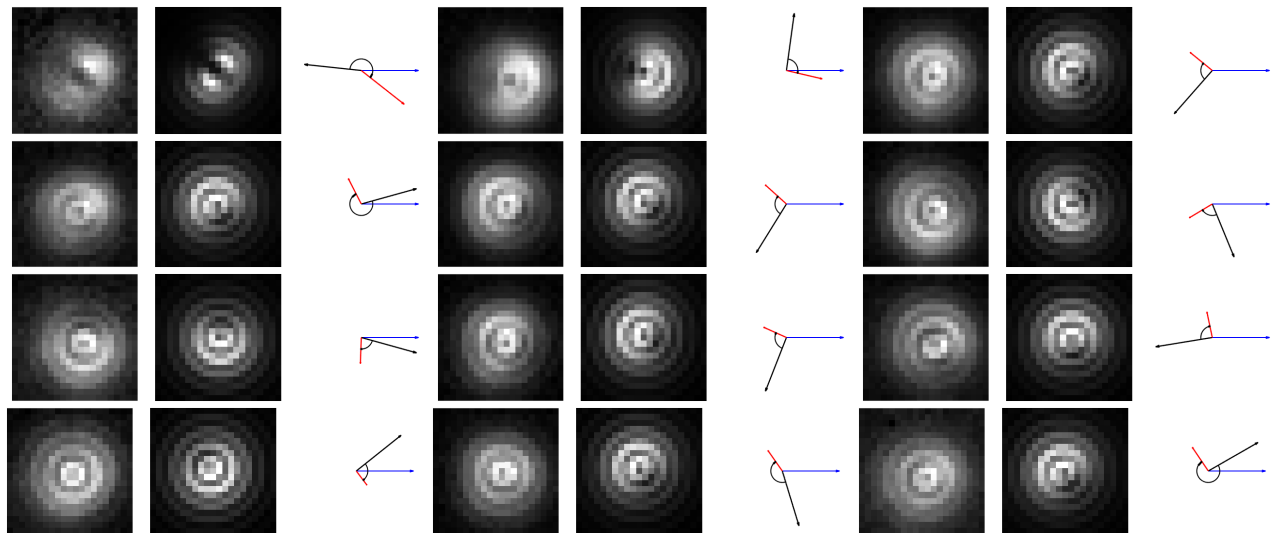

Figure S40: Each set of three sub-figures show the experimental dipole radiation pattern (left), simulated pattern (center) and in-plane orientations (right) in sample **-9GC**. X axis, DNA origami, and in-plane dipole orientation are represented by the blue, black and red arrows, respectively. Z axis points towards the image. The in-plane dipole orientation is the projection of half of the double-headed arrow on the plane, and its length is  $\sin(\theta)$ . The black curved arrow represents the angle of the dipole relative to the origami ( $\phi$ ). The lengths of the black and blue arrows are 1. The defocused distance in the simulations was 600 nm.

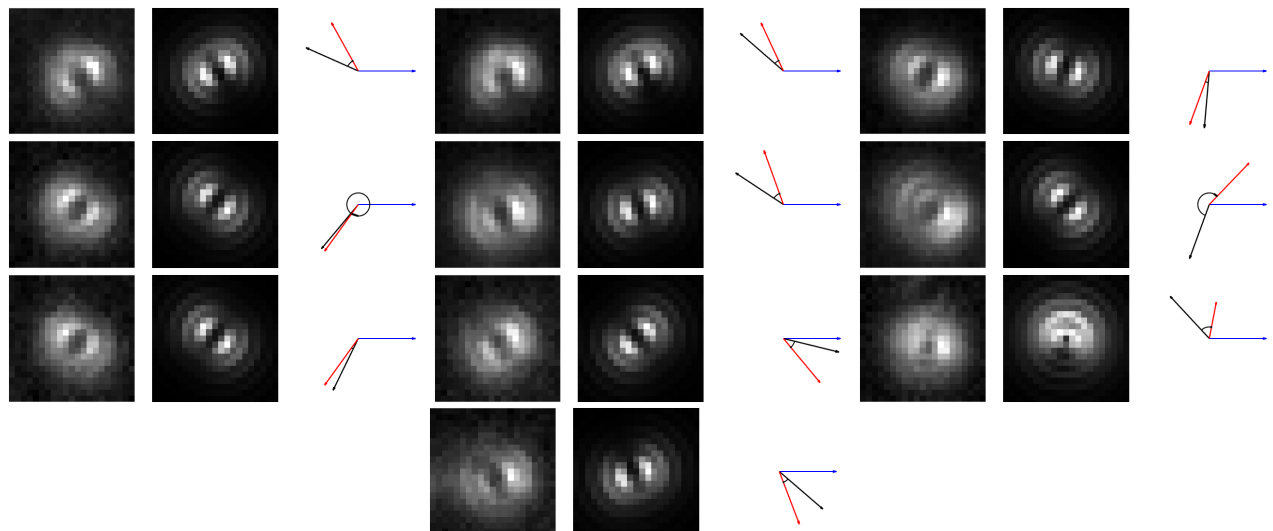

Figure S41: Each set of three sub-figures show the experimental dipole radiation pattern (left), simulated pattern (center) and in-plane orientations (right) in sample **-10GC**. X axis, DNA origami, and in-plane dipole orientation are represented by the blue, black and red arrows, respectively. Z axis points towards the image. The in-plane dipole orientation is the projection of half of the double-headed arrow on the plane, and its length is  $\sin(\theta)$ . The black curved arrow represents the angle of the dipole relative to the origami ( $\phi$ ). The lengths of the black and blue arrows are 1. The defocused distance in the simulations was 600 nm.

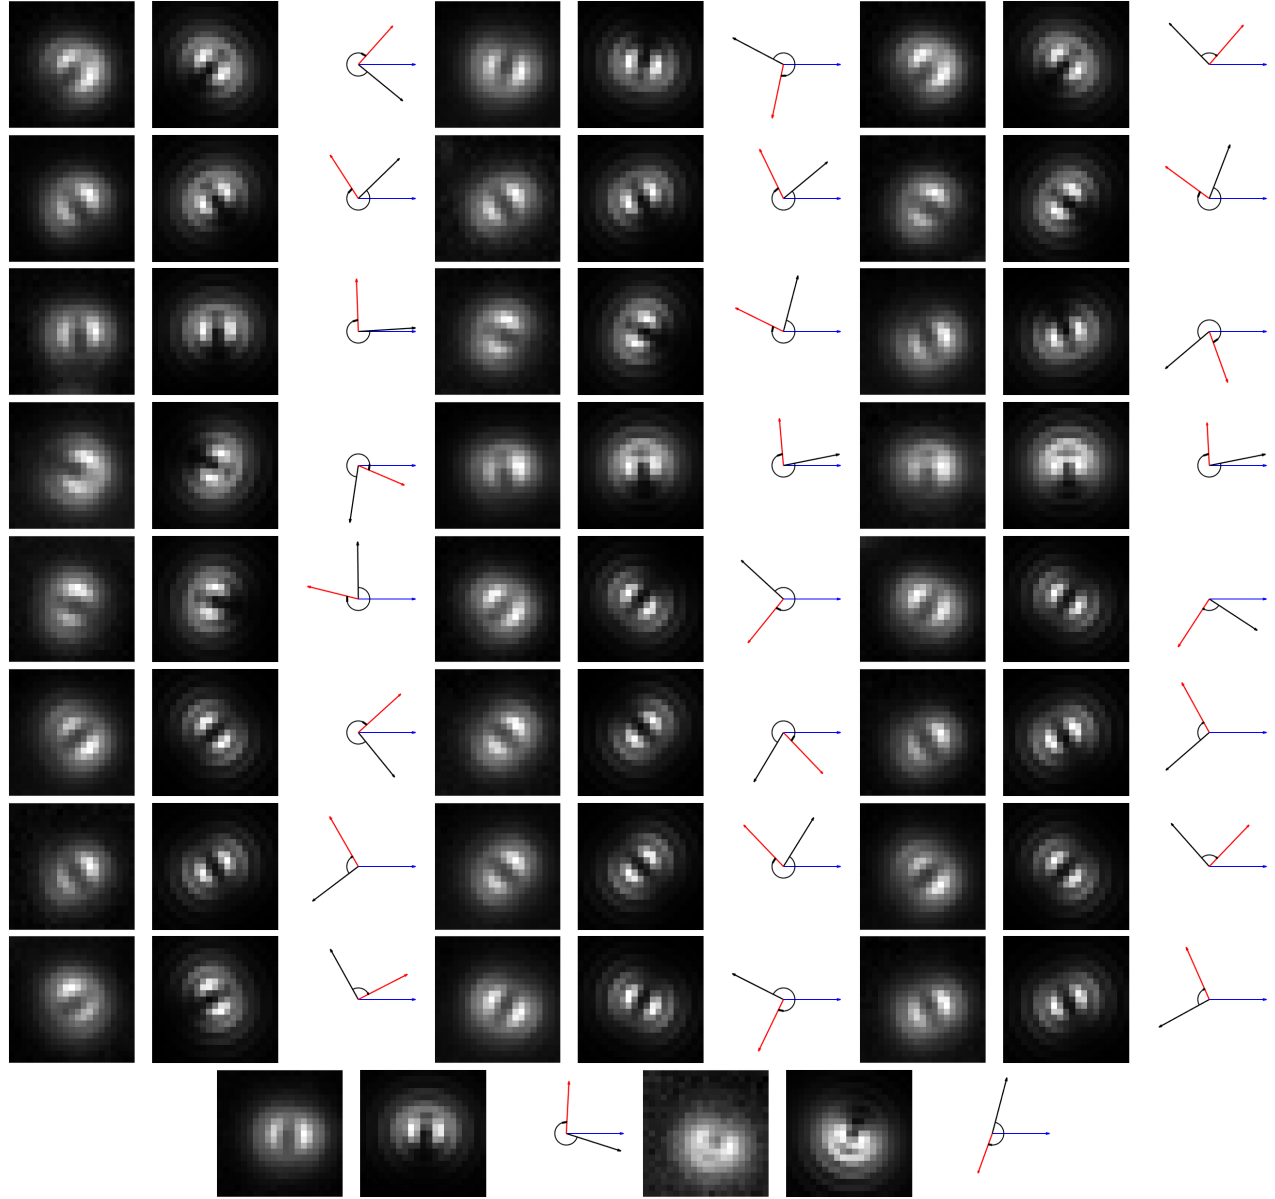

Figure S42: Each set of three sub-figures show the experimental dipole radiation pattern (left), simulated pattern (center) and in-plane orientations (right) in sample **-5TT**. X axis, DNA origami, and in-plane dipole orientation are represented by the blue, black and red arrows, respectively. Z axis points towards the image. The in-plane dipole orientation is the projection of half of the double-headed arrow on the plane, and its length is  $\sin(\theta)$ . The black curved arrow represents the angle of the dipole relative to the origami ( $\phi$ ). The lengths of the black and blue arrows are 1. The defocused distance in the simulations was 600 nm.

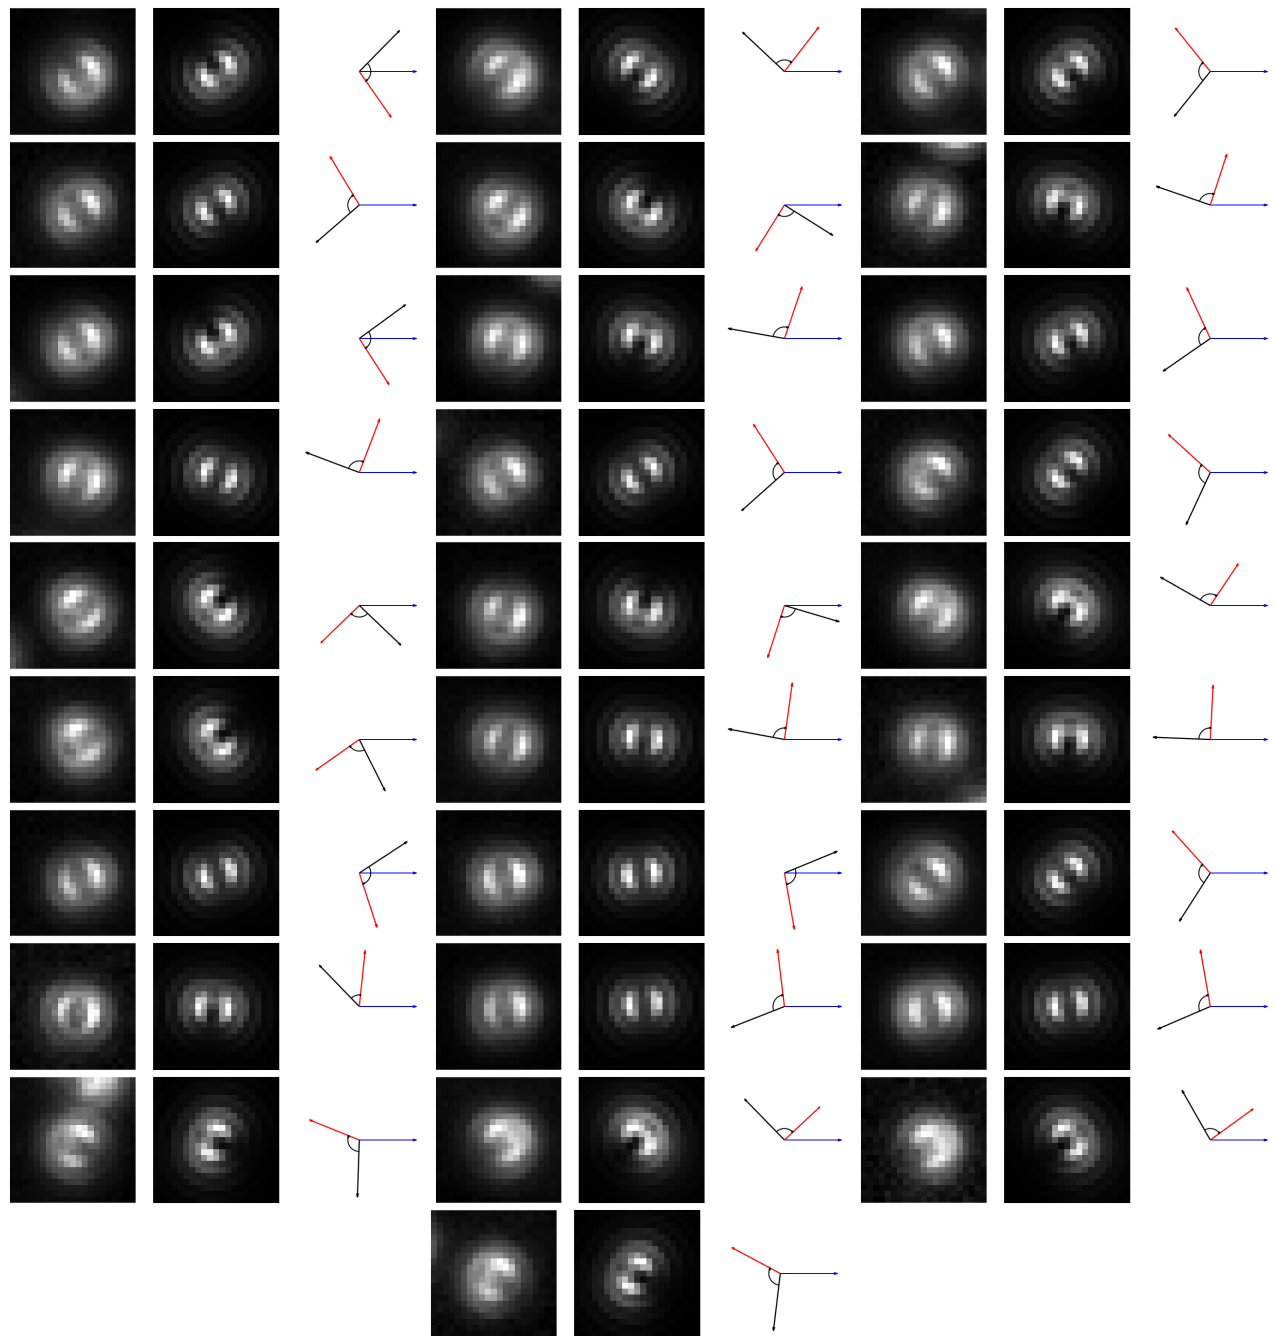

Figure S43: Each set of three sub-figures show the experimental dipole radiation pattern (left), simulated pattern (center) and in-plane orientations (right) in sample **-6TT**. X axis, DNA origami, and in-plane dipole orientation are represented by the blue, black and red arrows, respectively. Z axis points towards the image. The in-plane dipole orientation is the projection of half of the double-headed arrow on the plane, and its length is  $\sin(\theta)$ . The black curved arrow represents the angle of the dipole relative to the origami ( $\phi$ ). The lengths of the black and blue arrows are 1. The defocused distance in the simulations was 550 nm.

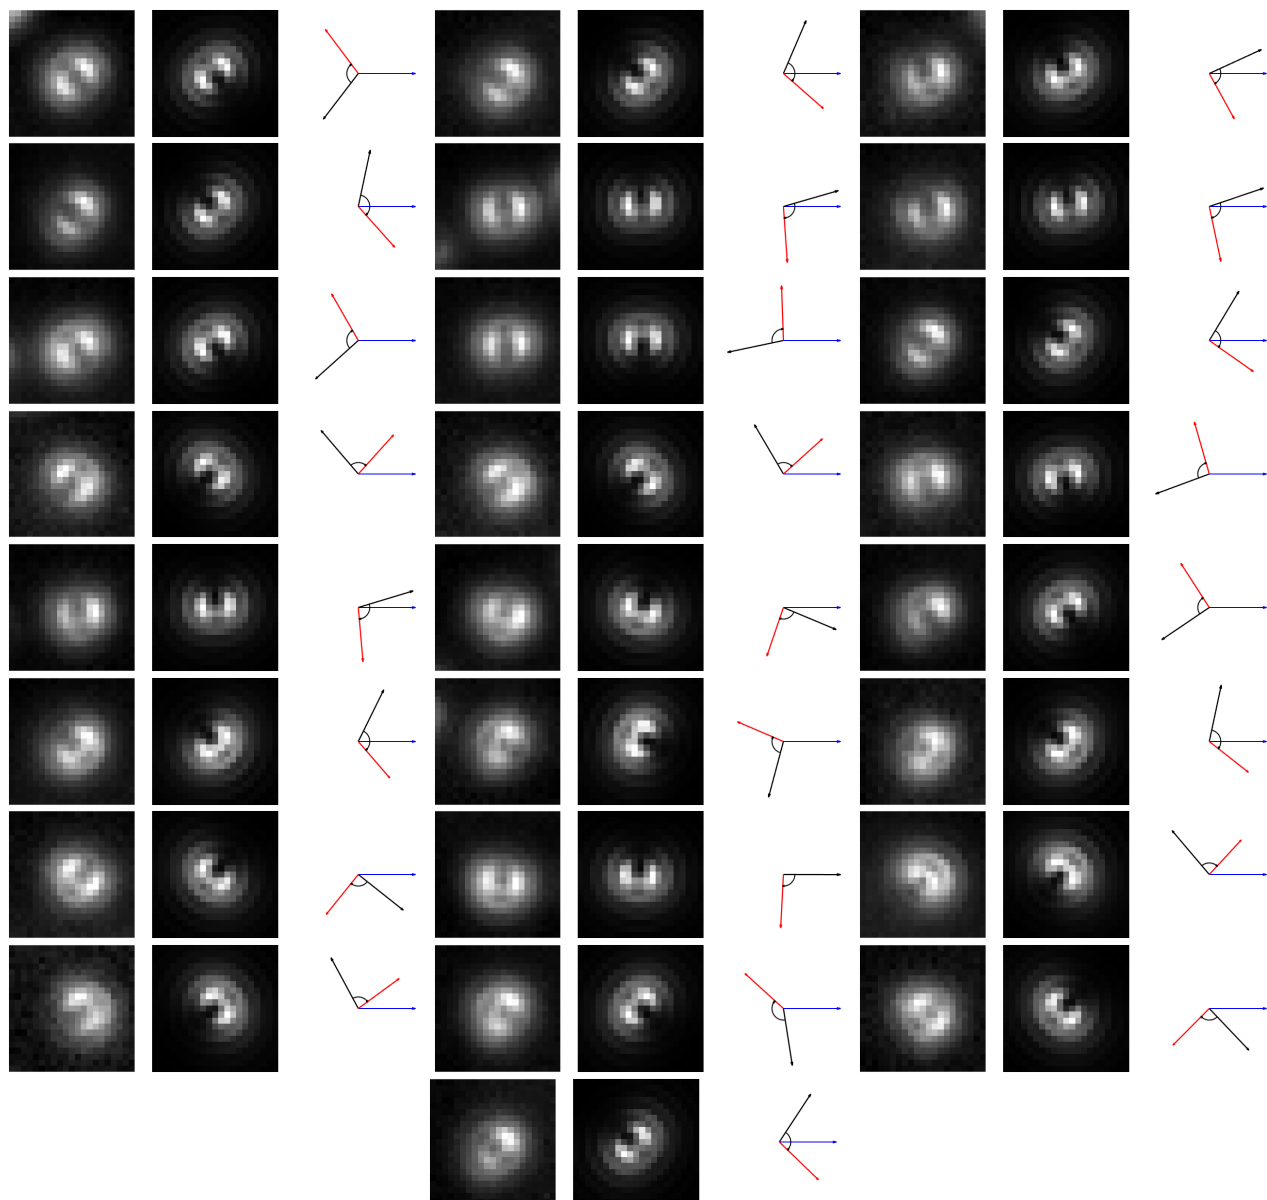

Figure S44: Each set of three sub-figures show the experimental dipole radiation pattern (left), simulated pattern (center) and in-plane orientations (right) in sample **-7TT**. X axis, DNA origami, and in-plane dipole orientation are represented by the blue, black and red arrows, respectively. Z axis points towards the image. The in-plane dipole orientation is the projection of half of the double-headed arrow on the plane, and its length is  $\sin(\theta)$ . The black curved arrow represents the angle of the dipole relative to the origami ( $\phi$ ). The lengths of the black and blue arrows are 1. The defocused distance in the simulations was 550 nm.

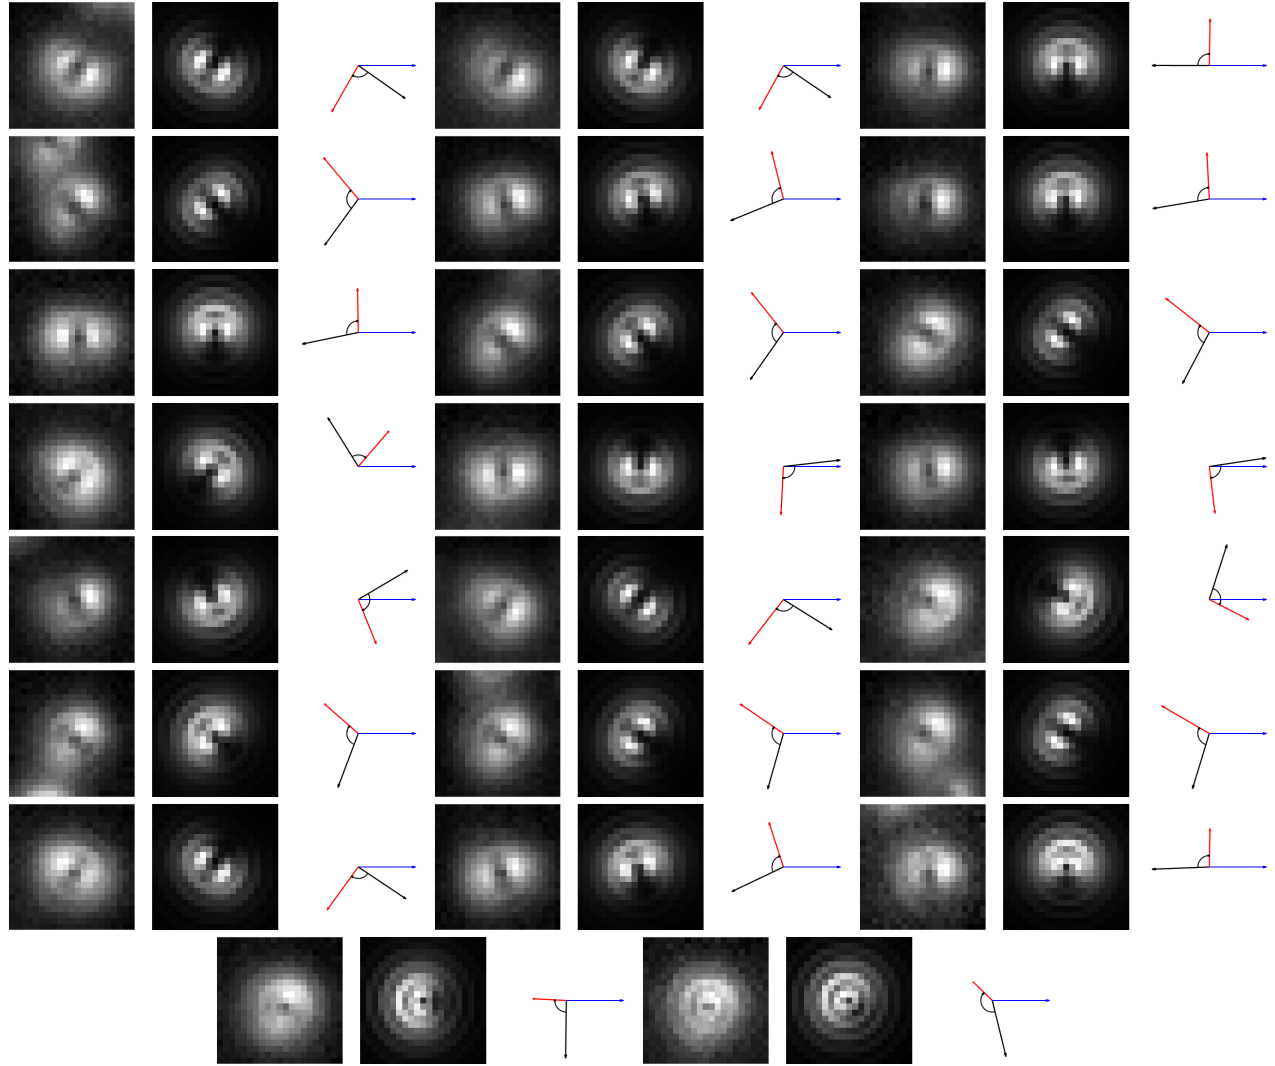

Figure S45: Each set of three sub-figures show the experimental dipole radiation pattern (left), simulated pattern (center) and in-plane orientations (right) in sample **-8TT**. X axis, DNA origami, and in-plane dipole orientation are represented by the blue, black and red arrows, respectively. Z axis points towards the image. The in-plane dipole orientation is the projection of half of the double-headed arrow on the plane, and its length is  $\sin(\theta)$ . The black curved arrow represents the angle of the dipole relative to the origami ( $\phi$ ). The lengths of the black and blue arrows are 1. The defocused distance in the simulations was 600 nm.

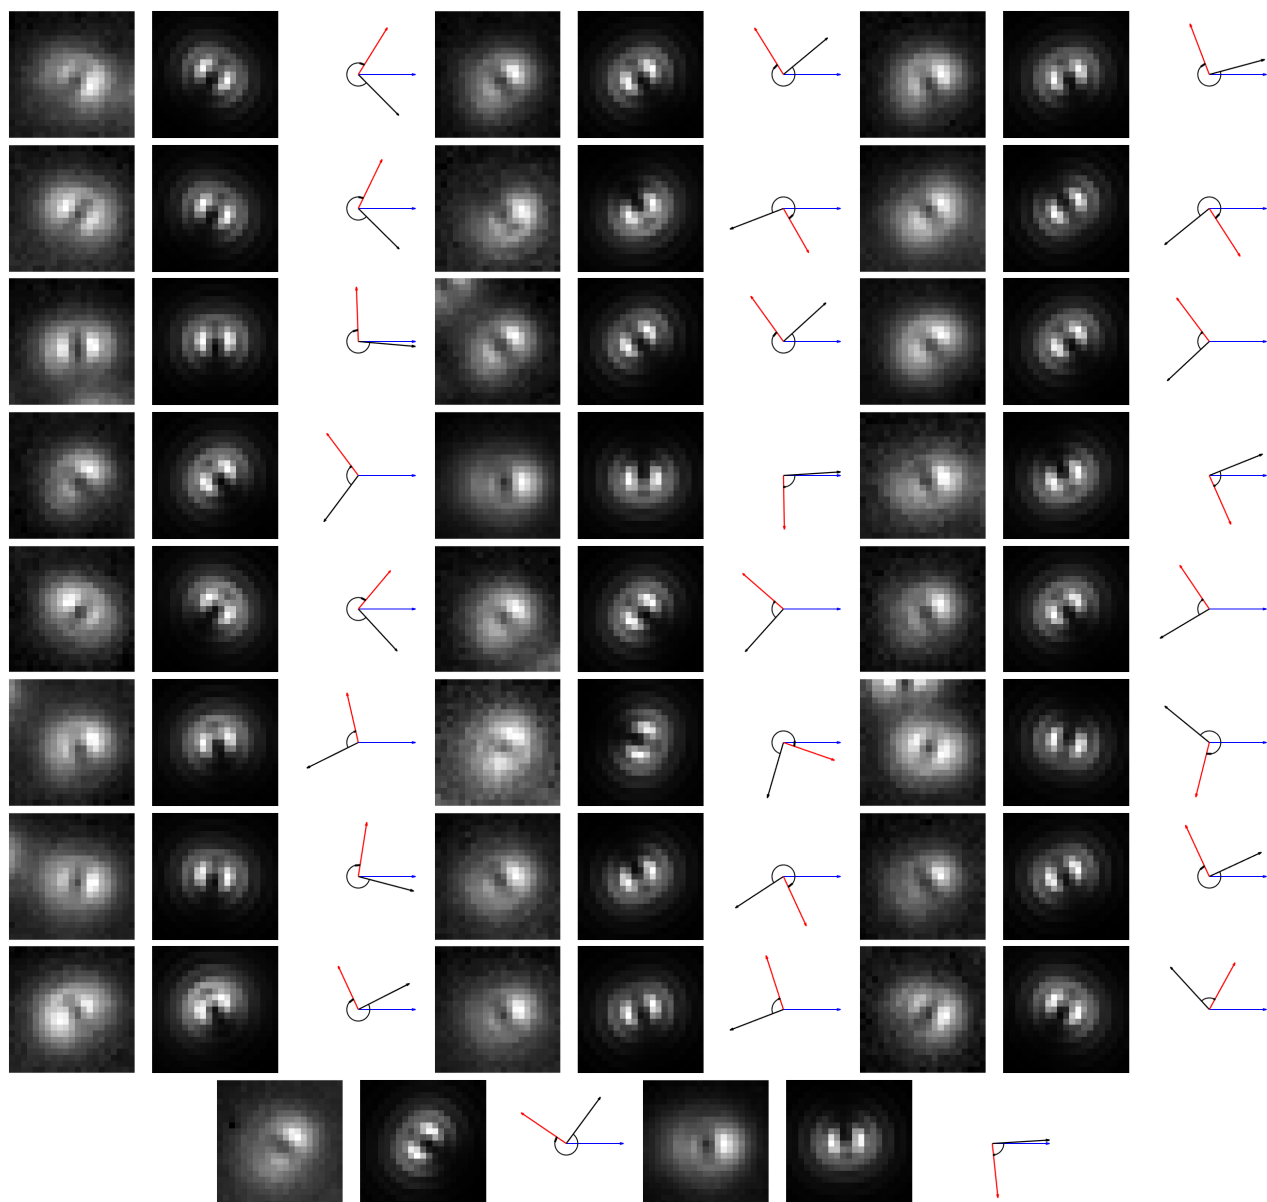

Figure S46: Each set of three sub-figures show the experimental dipole radiation pattern (left), simulated pattern (center) and in-plane orientations (right) in sample **-9TT**. X axis, DNA origami, and in-plane dipole orientation are represented by the blue, black and red arrows, respectively. Z axis points towards the image. The in-plane dipole orientation is the projection of half of the double-headed arrow on the plane, and its length is  $\sin(\theta)$ . The black curved arrow represents the angle of the dipole relative to the origami ( $\phi$ ). The lengths of the black and blue arrows are 1. The defocused distance in the simulations was 575 nm.

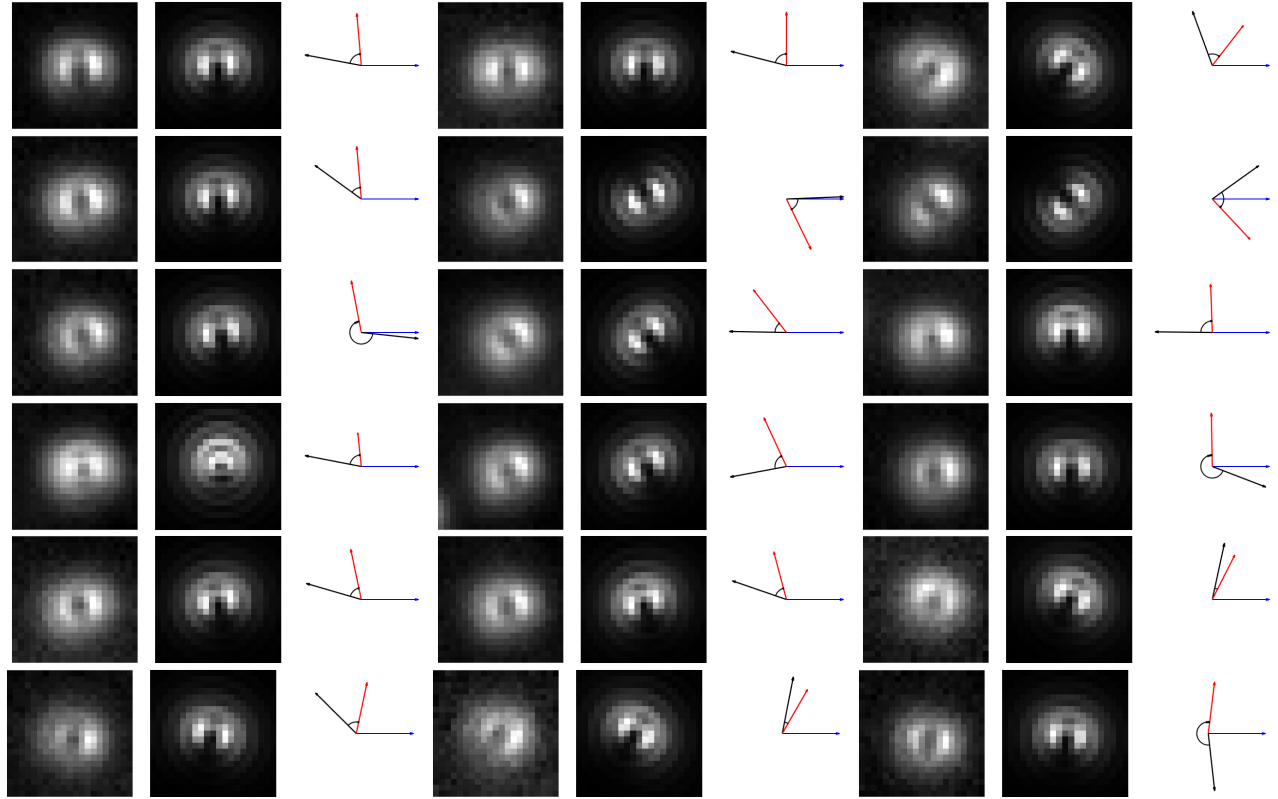

Figure S47: Each set of three sub-figures show the experimental dipole radiation pattern (left), simulated pattern (center) and in-plane orientations (right) in sample **-10TT**. X axis, DNA origami, and in-plane dipole orientation are represented by the blue, black and red arrows, respectively. Z axis points towards the image. The in-plane dipole orientation is the projection of half of the double-headed arrow on the plane, and its length is  $\sin(\theta)$ . The black curved arrow represents the angle of the dipole relative to the origami ( $\phi$ ). The lengths of the black and blue arrows are 1. The defocused distance in the simulations was 575 nm.



## References

- [1] W. K. Olson, A. A. Gorin, X. J. Lu, L. M. Hock, V. B. Zhurkin, *Proceedings of the National Academy of Sciences of the United States of America* **1998**, *95* 11163.
- [2] J. T. Kent, *Journal of the Royal Statistical Society: Series B (Methodological)* **1982**, *44* 71.
- [3] N. I. Fisher, T. Lewis, B. J. J. Embleton, *Statistical Analysis of Spherical Data*, Cambridge University Press, paperback edition (with errata), **1993**.
- [4] P. Leong, S. Carlile, *Journal of Neuroscience Methods* **1998**, *80* 191.
- [5] G. D. Dickinson, G. M. Mortuza, W. Clay, L. Piantanida, C. M. Green, C. Watson, E. J. Hayden, T. Andersen, W. Kuang, E. Graugnard, R. Zadegan, W. L. Hughes, *Nature Communications* **2021**, *12* 1.
